# Supplementary material for: A broad mutational target explains a fast rate of phenotypic evolution
Source: eLife journal article supplement (doi:10.7554/elife.54928), 2020-08-27
Supplement: supp [file elife_poa_e54928_Figure_3_figure_supplement_1.pdf › elife_poa_e54928_Figure_3_figure_supplement_1.pdf]

Cohort: 1x ancestor + n x MA line

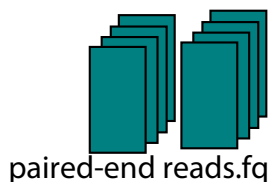

reference genome

genome.fa

repeats  
masked

non-  
masked

(based on GATK)

script 'GATK\_fq-to-gVCF.sh'

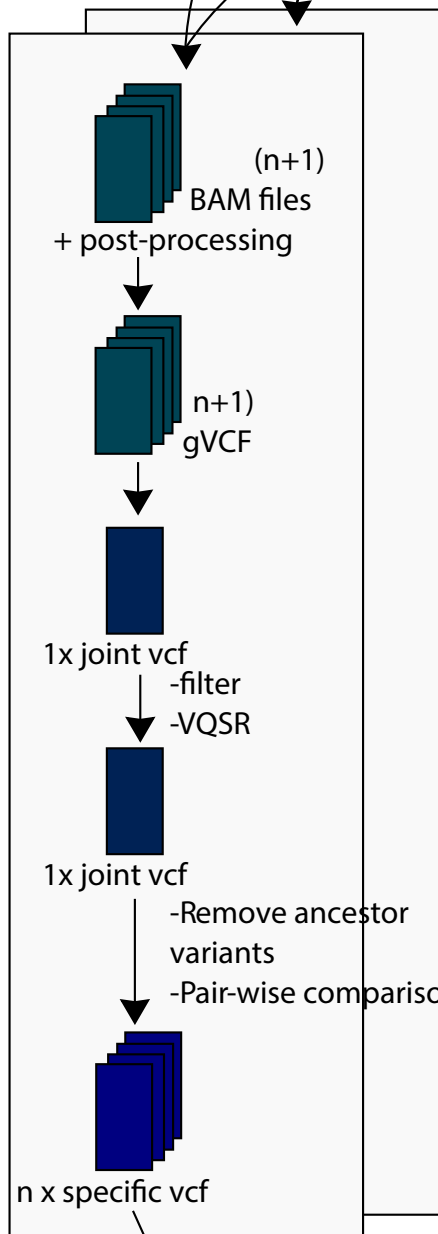

CALLING SHORT VARIANTS

Subtract  
masking  
artefacts

n x final vcf  
'small variants'

script 'fq-to-bam.sh'

(n+1) BAM files  
+ post-processing

filter unmapped  
read pairs

CALLING LONG VARIATIONS

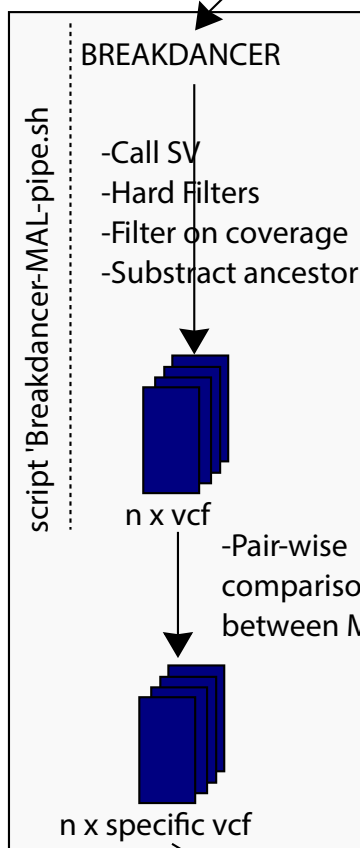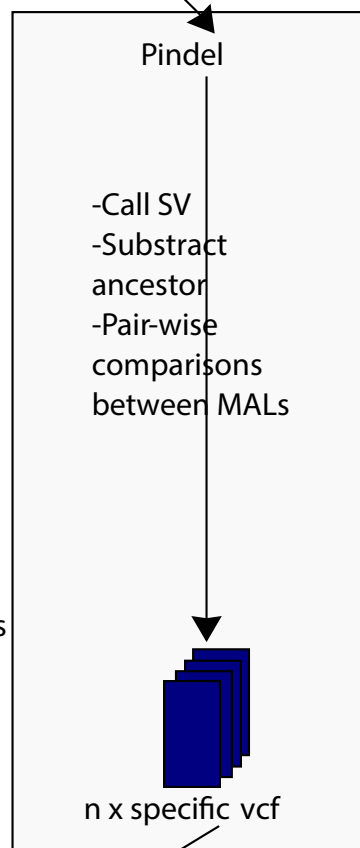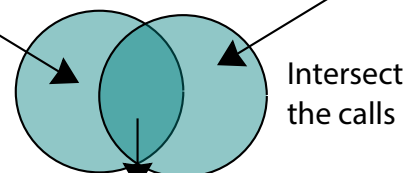

Intersect  
the calls

Validation by  
inspecting read  
alignments

n x final vcf  
'long variants'

Pool small and long variants

n x final vcf  
'total variants'
