# Supplementary material for: A broad mutational target explains a fast rate of phenotypic evolution
Source: eLife journal article supplement (doi:10.7554/elife.54928), 2020-08-27

a

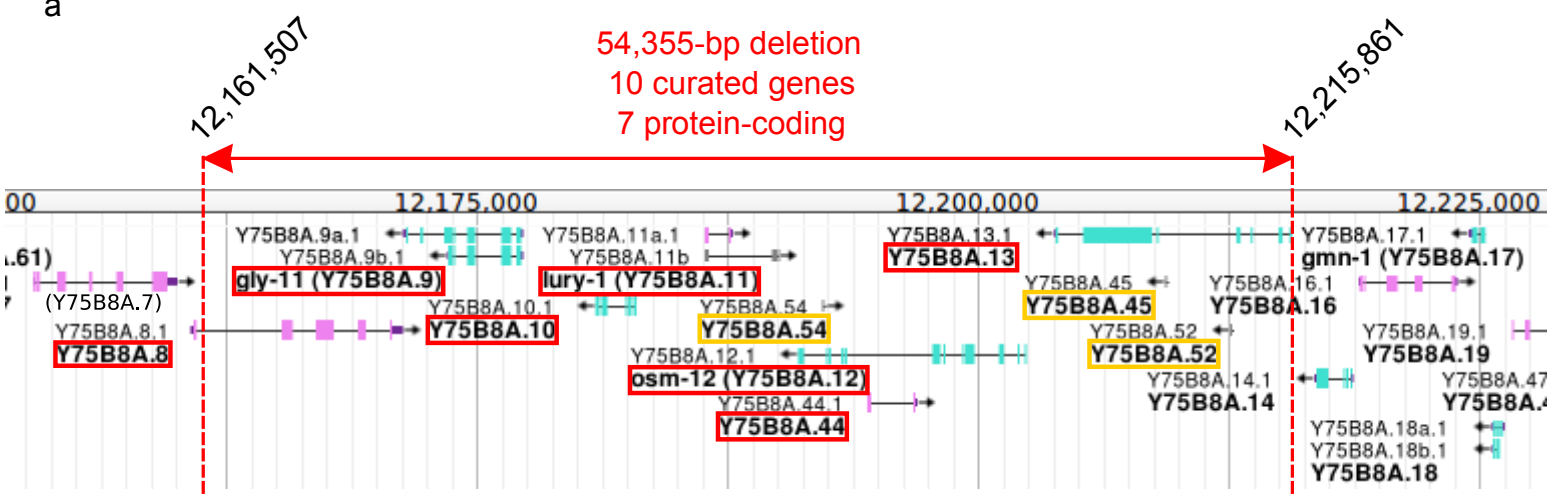

b

|                      | Y75B8A.8     | <i>gly-11</i><br>(Y75B8A.9)     | Y75B8A.10     | <i>lury-1</i><br>(Y75B8A.11)       | Y75B8A.44    | <i>osm-12</i><br>(Y75B8A.12)  | Y75B8A.13       |
|----------------------|--------------|---------------------------------|---------------|------------------------------------|--------------|-------------------------------|-----------------|
| Putative null allele |              | <i>gk342</i><br><i>gk944938</i> | <i>tm5064</i> | <i>gk961835</i><br><i>gk961862</i> |              | <i>n1606</i><br><i>ok1351</i> | <i>gk187847</i> |
| Targeted deletion    | <i>mf139</i> | <i>mf119</i><br><i>mf120</i>    | <i>mf135</i>  |                                    | <i>mf138</i> | <i>mf117</i>                  | <i>mf121</i>    |

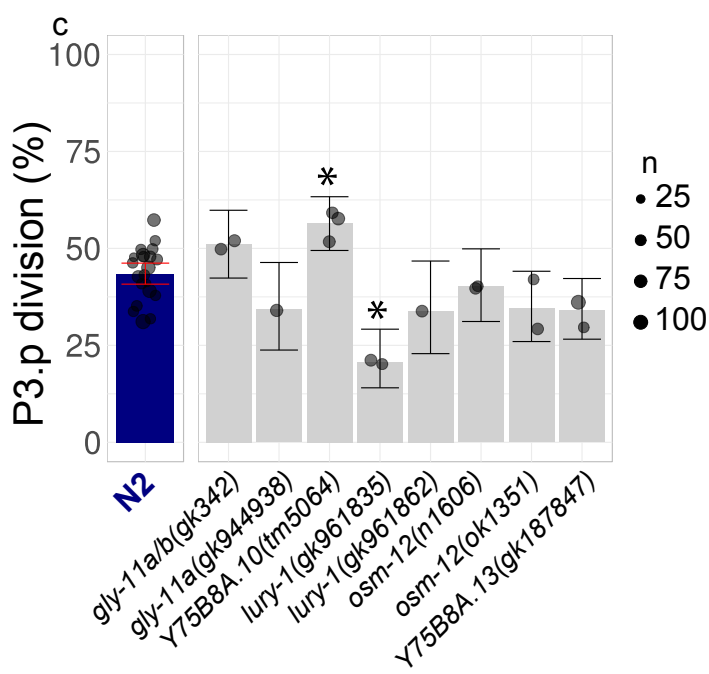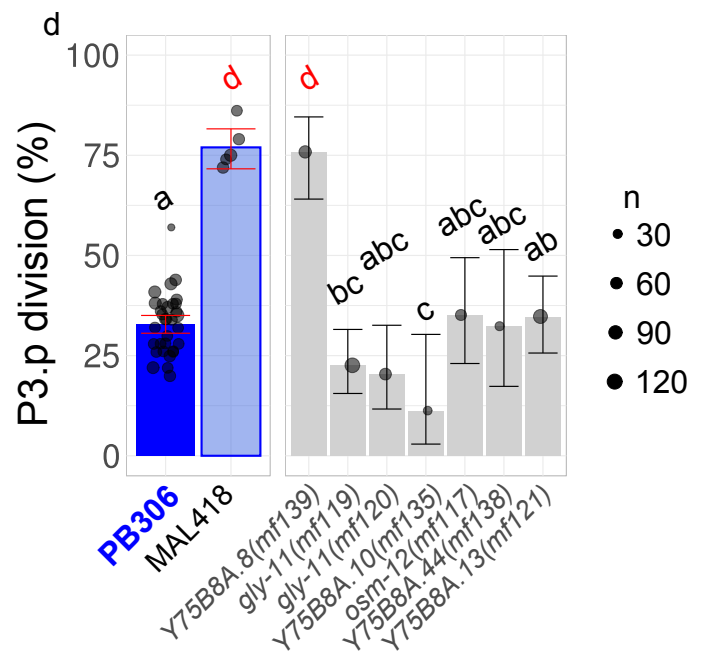

Supplement: supp [file elife_poa_e54928_Figure_4_figure_supplement_1.pdf › elife_poa_e54928_Figure_4_figure_supplement_1.pdf]
