# Supplementary material for: A broad mutational target explains a fast rate of phenotypic evolution
Source: eLife journal article supplement (doi:10.7554/elife.54928), 2020-08-27

Mutants related to MAL296 (candidate gene: *sfrp-1*)

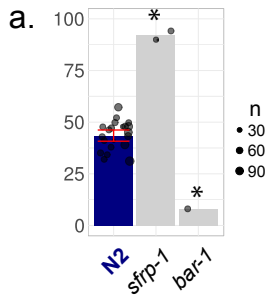

b.

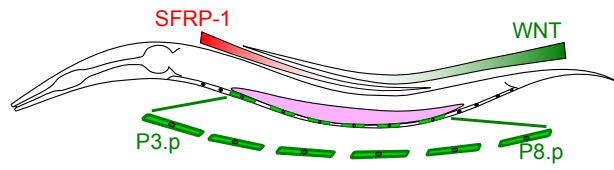

Mutants related to MAL450 (candidate gene: *cdk-8*)

P3.p division (%)

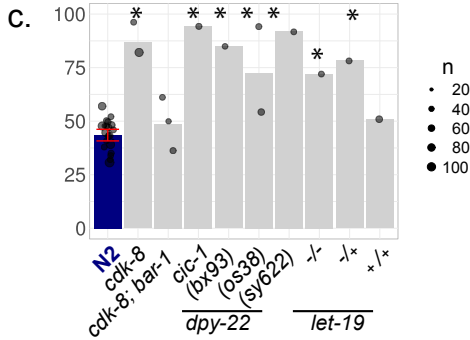

d.

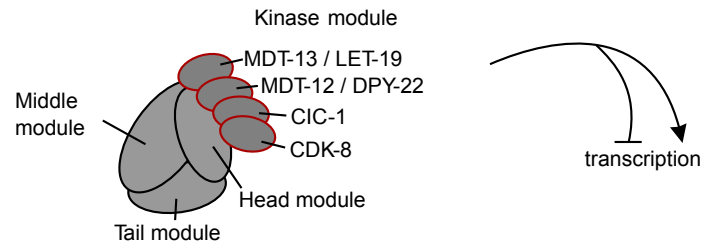

Mutants related to MAL516 (candidate gene: *gcn-1*)

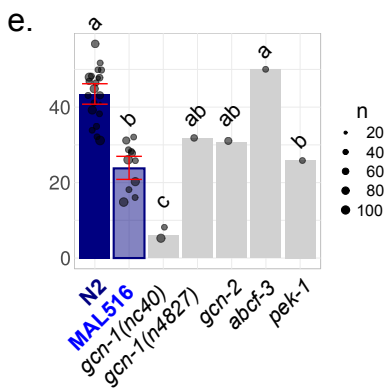

f.

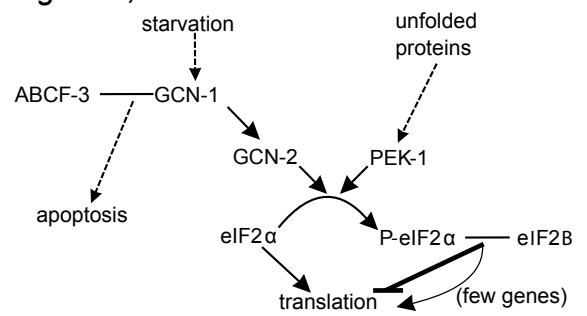

Supplement: supp [file elife_poa_e54928_Figure_4_figure_supplement_2.pdf › elife_poa_e54928_Figure_4_figure_supplement_2.pdf]
