# Supplementary material for: A broad mutational target explains a fast rate of phenotypic evolution
Source: eLife. 2020 Aug 27;9:e54928. doi: 10.7554/eLife.54928 (PMC7556874; doi:10.7554/eLife.54928)
Supplement: Supplementary file 3. — The columns are named according to the vcf format. In addition, column I provides the identifier of the tested marker and column H whether it was validated. The lines highlighted with a red background are the causative mutations. [file elife-54928-supp3.xlsx]

## Sheet: version_20180911.v3
Species	MAL-set	MAL	CHROM	POS	TYPE	EVENTLENGTH	status	ID_markers	REF	ALT	QUAL	DP	MLEAC	MLEAF	MQ	PROG.GT	PROG.AD	PROG.DP	PROG.GQ	PROG.PL	causal mutation	coding gene	protein change
Cbriggsae	HK104	MAL296	I	499724	SNP	0	predicted		G	T	328.14	54	2	0.333	60	G/G	22	22	60	0,60,715
Cbriggsae	HK104	MAL296	I	739968	INDEL	38	predicted		T	TATGTGA,TATGTGATTTCAAGCTTTCAAAGGGCGAATAACGAGAAC	987.32	38	2.2	0.333,0.333	55.68	TATGTGA/TATGTGA	0,16,0	16	48	719,48,0,720,48,720
Cbriggsae	HK104	MAL296	I	1017730	SNP	0	predicted		G	A	537.19	48	2	0.333	60	G/G	18	18	51	0,51,765
Cbriggsae	HK104	MAL296	I	2469391	INDEL	7	predicted		A	ACCCCC,ACCCC,ACCCCCCC	1007.89	21	2,2,2	0.333,0.333,0.333	60.51	ACCCCC/ACCCCC	0,8,0,0	8	27	383,27,0,383,27,383,383,27,383,383
Cbriggsae	HK104	MAL296	I	2928149	INDEL	21	predicted		T	TAGAGTATGCATTCTAC,TAGAGTATGCATTCTACCGTGA	319.11	13	1.2	0.167,0.333	50.99	TAGAGTATGCATTCTAC/TAGAGTATGCATTCTAC	0,3,0	3	9	134,9,0,135,9,135
Cbriggsae	HK104	MAL296	I	3049864	INDEL	4	predicted		A	AACAT	709.1	63	2	0.333	56.52	A/A	22	22	60	0,60,900
Cbriggsae	HK104	MAL296	I	4777144	SNP	0	validated	I-1_1	A	T	967.14	90	2	0.333	60	A/A	34	34	99	0,99,1038
Cbriggsae	HK104	MAL296	I	7661684	SNP	0	predicted		C	G	1036.14	80	2	0.333	60	C/C	22	22	60	0,60,602
Cbriggsae	HK104	MAL296	I	7923080	SNP	0	validated	I-2_4	G	A	840.14	58	2	0.333	60	G/G	11	11	33	0,33,314
Cbriggsae	HK104	MAL296	I	10961141	INDEL	35	predicted		A	ACCTAAAATGTTGTGTTACGTACAGTGAT,ACCTAAAATGTTGTGTTACGTAC,ACCTAAAATGTTGTGTTACGTACAGTGATACGTGAT	675.01	19	2,2,2	0.333,0.333,0.333	60	ACCTAAAATGTTGTGTTACGTACAGTGAT/ACCTAAAATGTTGTGTTACGTACAGTGAT	0,5,0,0	5	14	223,14,0,224,15,225,224,15,225,225
Cbriggsae	HK104	MAL296	I	11134633	INDEL	-14	predicted		GTTTGGCTTCTTAAA	G	116.11	34	2	0.333	90.33	GTTTGGCTTCTTAAA/GTTTGGCTTCTTAAA	8	8	22	0,22,329
Cbriggsae	HK104	MAL296	I	11134637	INDEL	-7	predicted		GGCTTCTT	G,*	927.94	33	4.2	0.667,0.333	54.27	G/G	0,8,0	8	22	329,22,0,330,24,332
Cbriggsae	HK104	MAL296	I	12719619	INDEL	-8	predicted		ACGATTCTC	AGATTCTC,A	685.01	16	4.2	0.667,0.333	37.54	AGATTCTC/AGATTCTC	0,5,0	5	15	225,15,0,225,15,225
Cbriggsae	HK104	MAL296	I	12719621	SNP	0	predicted		G	A,*	694.05	16	4.2	0.667,0.333	31.77	A/A	0,5,0	5	15	225,15,0,225,15,225
Cbriggsae	HK104	MAL296	I	12719625	SNP	0	predicted		C	T,*	649.06	14	4.2	0.667,0.333	30.41	T/T	0,5,0	5	15	225,15,0,225,15,225
Cbriggsae	HK104	MAL296	I	13377672	INDEL	-6	predicted		GGTGGAT	G	135.07	20	2	0.333	57.47	GGTGGAT/GGTGGAT	7	7	9	0,9,135
Cbriggsae	HK104	MAL296	I	13377679	SNP	0	predicted		T	C	100.82	17	2	0.333	56.82	T/T	6	6	6	0,6,90
Cbriggsae	HK104	MAL296	I	13771407	INDEL	28	predicted		TTC	T,TCAAAAATTATTGAACAGCATAAAATCTATC	506.12	13	4.2	0.667,0.333	60	T/T	0,3,0	3	9	113,9,0,113,9,113
Cbriggsae	HK104	MAL296	I	13828015	INDEL	7	predicted		T	TGGGGGGG,TGGGGGG	1399.51	35	2.2	0.333,0.333	59.39	TGGGGGGG/TGGGGGGG	0,13,0	13	60	900,60,0,900,60,900
Cbriggsae	HK104	MAL296	I	13920230	SNP	0	predicted		A	G	465.2	15	5	0.833	36.53	G/G	0.4	4	12	180,12,0
Cbriggsae	HK104	MAL296	I	14079680	INDEL	17	predicted		A	ACTTCGCTAGAGTCCGTT	89.35	28	2	0.333	60	A/A	15	15	21	0,21,315
Cbriggsae	HK104	MAL296	I	14748740	INDEL	-10	predicted		ACCTAGAAGGG	A	1348.33	58	2	0.333	54.52	ACCTAGAAGGG/ACCTAGAAGGG	15	15	15	0,15,225
Cbriggsae	HK104	MAL296	I	14748758	INDEL	-4	predicted		GGATC	G	1304.29	52	2	0.333	53.86	GGATC/GGATC	11	11	12	0,12,180
Cbriggsae	HK104	MAL296	I	14748764	INDEL	-8	predicted		AAGAGGAGT	A	1398.55	47	3	0.5	53.86	AAGAGGAGT/AAGAGGAGT	8	8	3	0,3,45
Cbriggsae	HK104	MAL296	I	14748773	INDEL	-21	predicted		CTGAAAAGATCTAGAAGGGGGT	C	1402.13	50	4	0.667	54.27	CTGAAAAGATCTAGAAGGGGGT/CTGAAAAGATCTAGAAGGGGGT	8	8	0	0,0,182
Cbriggsae	HK104	MAL296	I	14834119	INDEL	10	predicted		A	AAGGTGGGGGG	470.02	22	4	0.667	59.36	AAGGTGGGGGG/AAGGTGGGGGG	0.9	9	27	385,27,0
Cbriggsae	HK104	MAL296	II	1094535	INDEL	26	predicted		A	ATCTACTTCATACCATTCTGTTCATCT	412.72	25	2	0.333	60	A/A	6	6	15	0,15,225
Cbriggsae	HK104	MAL296	II	1094538	INDEL	8	predicted		T	TCAAAACCG	223.83	20	2	0.333	60	T/T	6	6	15	0,15,225
Cbriggsae	HK104	MAL296	II	1816137	INDEL	21	predicted		A	AATTTTCTGATTTCAAACACAC	457.81	33	2	0.333	50.71	A/A	10	10	3	0,3,45
Cbriggsae	HK104	MAL296	II	2851596	INDEL	4	validated	II-1_10	T	TTACG	538.12	38	2	0.333	60	T/T	10	10	27	0,27,405
Cbriggsae	HK104	MAL296	II	3193329	INDEL	69	predicted		T	TAATACCAAAATTTACCCCAACCGTATACCAAGTCTACCGAGCCCACTACAGGCCGGCGCACAACCCGGC,TAA	403.38	20	2.1	0.333,0.167	57.36	T/T	10,0,0	10	18	0,18,270,18,270,270
Cbriggsae	HK104	MAL296	II	3343616	INDEL	69	predicted		A	ATTTGAATTGGGTATTCTCTACTAGTACTCGGAAGAAAAAAGGTTTTGAAATTCTTCTTCC,ATTTGAATTGGGTATTCTCTACTAGTACTCGGAAGAAAAAAGGTTTTGAAATTCTTCTTCCCAGATGTTT	765.25	30	2.2	0.333,0.333	58.33	ATTTGAATTGGGTATTCTCTACTAGTACTCGGAAGAAAAAAGGTTTTGAAATTCTTCTTCC/ATTTGAATTGGGTATTCTCTACTAGTACTCGGAAGAAAAAAGGTTTTGAAATTCTTCTTCC	0,8,0	8	24	360,24,0,360,24,360
Cbriggsae	HK104	MAL296	II	4978309	INDEL	3	predicted		T	TATA	898.1	63	2	0.333	60	T/T	21	21	34	0,34,485
Cbriggsae	HK104	MAL296	II	8065839	INDEL	32	predicted		A	ATAAAAGATCCTTTCGAGATGGGCTCGGAAAAT	322.17	26	4	0.667	60	A/A	12	12	0	0,0,81
Cbriggsae	HK104	MAL296	II	10725744	INDEL	1	predicted		A	AC	135.76	19	2	0.333	60	A/A	6	6	6	0,6,90
Cbriggsae	HK104	MAL296	II	10985468	SNP	0	predicted		T	A	78.11	22	2	0.333	49.83	T/T	8	8	9	0,9,135
Cbriggsae	HK104	MAL296	II	11060581	SNP	0	validated	II-2_1	G	T	672.14	72	2	0.333	60	G/G	24	24	60	0,60,900
Cbriggsae	HK104	MAL296	II	11998278	SNP	0	predicted		G	A	907.14	59	2	0.333	60	G/G	20	20	57	0,57,855
Cbriggsae	HK104	MAL296	II	12068513	INDEL	6	predicted		C	CCATGTT	313.49	30	2	0.333	60	C/C	10	10	15	0,15,225
Cbriggsae	HK104	MAL296	II	12890547	INDEL	9	predicted		T	TAAGAAGGAG	134.64	34	2	0.333	60	T/T	11	11	12	0,12,180
Cbriggsae	HK104	MAL296	II	12952131	INDEL	-1	predicted		TC	T	93.82	11	2	0.333	40	TC/TC	5	5	3	0,3,45
Cbriggsae	HK104	MAL296	II	13691810	INDEL	34	predicted		A	ACCGTAAAACCTCTAATAGAACGACACCCGGATCG	313.99	24	2	0.333	60	A/A	6	6	12	0,12,180
Cbriggsae	HK104	MAL296	II	13996935	SNP	0	predicted		G	A	89.02	15	3	0.5	30.2	G/G	6	6	0	0,0,134
Cbriggsae	HK104	MAL296	II	14680972	INDEL	28	predicted		A	AAGGTGGGGGGACAGGTGATTTTTCGTAG	134.02	30	2	0.333	60	A/A	9	9	9	0,9,135
Cbriggsae	HK104	MAL296	II	15932230	INDEL	22	predicted		A	ACATACAGTACTGGCCAAAAAGG	358.15	44	2	0.333	60	A/A	21	21	54	0,54,810
Cbriggsae	HK104	MAL296	II	15932233	INDEL	5	predicted		T	TTCGCA	178.74	40	2	0.333	60	T/T	20	20	57	0,57,855
Cbriggsae	HK104	MAL296	II	16008629	SNP	0	predicted		T	A	728.68	21	4	0.667	51.98	A/A	0.4	4	12	180,12,0
Cbriggsae	HK104	MAL296	II	16101047	SNP	0	predicted		C	A	719.14	69	2	0.333	60	C/C	19	19	57	0,57,521
Cbriggsae	HK104	MAL296	III	464918	INDEL	7	predicted		T	TCCCCCC,TCCCCCCC	992.89	23	4.2	0.667,0.333	60.47	TCCCCCC/TCCCCCC	0,9,0	9	27	398,27,0,398,27,398
Cbriggsae	HK104	MAL296	III	545494	SNP	0	validated	III-1_7	C	T	637.14	60	2	0.333	60	C/C	16	16	42	0,42,630
Cbriggsae	HK104	MAL296	III	2035181	INDEL	2	predicted		C	CCT	65.59	18	2	0.333	25.25	C/C	9	9	21	0,21,315
Cbriggsae	HK104	MAL296	III	2476915	SNP	0	predicted		G	A	53.31	12	4	0.667	36.97	G/G	4	4	0	0,0,65
Cbriggsae	HK104	MAL296	III	2617262	SNP	0	predicted		T	A	211.72	40	2	0.333	60	T/T	13	13	15	0,15,225
Cbriggsae	HK104	MAL296	III	2882092	INDEL	5	predicted		A	AGCGTG	1751.43	68	4	0.667	53.86	AGCGTG/AGCGTG	0.19	19	59	898,59,0
Cbriggsae	HK104	MAL296	III	3638583	INDEL	32	predicted		T	TTTTGAGCACGAGCACGCATTTTTGAGCACGCA,TTTTGAGCACGCA	2596.86	50	4.2	0.667,0.333	57.4	TTTTGAGCACGAGCACGCATTTTTGAGCACGCA/TTTTGAGCACGAGCACGCATTTTTGAGCACGCA	0,16,0	16	63	944,63,0,944,63,945
Cbriggsae	HK104	MAL296	III	4479559	INDEL	3	NA	III-1_9	C	CGG,CGGG	1765.86	57	4.2	0.667,0.333	60	CGG/CGG	0,24,0	24	72	813,72,0,813,72,813
Cbriggsae	HK104	MAL296	III	5028318	INDEL	29	predicted		C	CGTAAAACCTCTAATAGAACGACACCCGGA	313.34	31	2	0.333	60	C/C	12	12	18	0,18,270
Cbriggsae	HK104	MAL296	III	6486999	SNP	0	predicted		C	A	734.14	89	2	0.333	60	C/C	33	33	90	0,90,1350
Cbriggsae	HK104	MAL296	III	7071769	INDEL	32	predicted		G	GGACGAATCTCAAAGTACATTCGGTCACCGCAA,GGACGAATCTCAAAGTACATTCGGTCA	526.14	13	2.2	0.333,0.333	68.41	GGACGAATCTCAAAGTACATTCGGTCACCGCAA/GGACGAATCTCAAAGTACATTCGGTCACCGCAA	0,5,0	5	15	225,15,0,225,15,225
Cbriggsae	HK104	MAL296	III	7118936	INDEL	36	predicted		G	GCGAGAGCCCGACTTCCAATATTCTTCGAACGCTTT,GCGAGAGCCCGACTTCCAATATTCTTCGAACGCT,GCGAGAGCCCGACTTCCAATATTCTTCGAACGCTTTT	1053.88	30	2,2,2	0.333,0.333,0.333	60	GCGAGAGCCCGACTTCCAATATTCTTCGAACGCTTT/GCGAGAGCCCGACTTCCAATATTCTTCGAACGCTTT	0,7,0,0	7	21	263,21,0,263,21,263,263,21,263,263
Cbriggsae	HK104	MAL296	III	8301576	SNP	0	predicted		G	A	775.14	73	2	0.333	60	G/G	22	22	60	0,60,900
Cbriggsae	HK104	MAL296	III	9452095	INDEL	4	predicted		A	ATATG	95.29	61	2	0.333	60	A/A	28	28	75	0,75,1125
Cbriggsae	HK104	MAL296	III	10236538	INDEL	3	predicted		G	GAGT	134.39	33	2	0.333	47.47	G/G	13	13	27	0,27,405
Cbriggsae	HK104	MAL296	III	10296226	SNP	0	validated	III-2_1	C	A	797.14	74	2	0.333	60	C/C	25	25	72	0,72,715
Cbriggsae	HK104	MAL296	III	10335587	SNP	0	predicted		A	T	847.14	76	2	0.333	60	A/A	25	25	72	0,72,663
Cbriggsae	HK104	MAL296	III	10749245	SNP	0	predicted		G	C	385.9	33	2	0.333	60	G/G	4	4	9	0,9,135
Cbriggsae	HK104	MAL296	III	11375736	INDEL	46	predicted		A	ACTCAGGCGTCGCCGGTTACTTCTAACCGGAGCTTGGCCAGATTCC,ACTCAGGCGTCGCCGGTTACTTCTAACCGGAGCTTGGCCAGATTCCG	1145.75	43	2.2	0.333,0.333	60	ACTCAGGCGTCGCCGGTTACTTCTAACCGGAGCTTGGCCAGATTCC/ACTCAGGCGTCGCCGGTTACTTCTAACCGGAGCTTGGCCAGATTCC	0,17,0	17	50	763,50,0,764,51,765
Cbriggsae	HK104	MAL296	III	11867056	INDEL	7	predicted		T	TTCTCAGG	357.34	35	2	0.333	60	T/T	13	13	12	0,12,180
Cbriggsae	HK104	MAL296	III	12701674	INDEL	44	predicted		T	TCGAATTTCTGTTTGATTCGATAAGTAAAATGTAGA,TCGAATTTCTGTTTGATTCGATAAGTAAAATGTAGAACTTTAAAA,TCGAATTTCTGTTTGATTCGATAAGTAAAATGTAGAACTTTAAA	795.94	20	2,2,2	0.333,0.333,0.333	60	TCGAATTTCTGTTTGATTCGATAAGTAAAATGTAGA/TCGAATTTCTGTTTGATTCGATAAGTAAAATGTAGA	0,8,0,0	8	24	358,24,0,358,24,358,358,24,358,358
Cbriggsae	HK104	MAL296	III	13265662	SNP	0	predicted		G	A	151.78	29	4	0.667	48.47	G/G	15	15	0	0,0,331
Cbriggsae	HK104	MAL296	III	13643579	INDEL	49	predicted		A	ATCCCCCCCACCTGCTAACTCCCAACTTTGAGCCAATTTATCTCGGTTTC	627.1	72	2	0.333	60	A/A	23	23	45	0,45,675
Cbriggsae	HK104	MAL296	III	13795084	SNP	0	predicted		C	A	700.14	86	2	0.333	60	C/C	30	30	90	0,90,881
Cbriggsae	HK104	MAL296	III	14555601	INDEL	12	predicted		T	TACAGGGTGGCCG	314.17	20	4	0.667	60	TACAGGGTGGCCG/TACAGGGTGGCCG	0.5	5	15	225,15,0
Cbriggsae	HK104	MAL296	IV	118011	SNP	0	predicted		C	T,*	304.8	16	2.1	0.333,0.167	40.98	C/C	3,1,0	4	3	0,3,58,9,61,67
Cbriggsae	HK104	MAL296	IV	118012	SNP	0	predicted		C	T,G	561.08	14	3.2	0.500,0.333	40.13	T/T	0,3,1	4	3	249,18,0,76,3,58
Cbriggsae	HK104	MAL296	IV	376791	INDEL	41	predicted		A	ACTAGGGAATGACTCACAGAAGATGTGG,ACTAGGGAATGACTCACAGAAGATGTGGAGTTATGGGACGAG	456.07	23	2.2	0.333,0.333	60	ACTAGGGAATGACTCACAGAAGATGTGG/ACTAGGGAATGACTCACAGAAGATGTGG	0,6,0	6	18	270,18,0,270,18,270
Cbriggsae	HK104	MAL296	IV	1277859	INDEL	45	predicted		T	TCGCCGACCGACAGCCAAGCCGACCAAGCTGACTGATCGGTCGGCG	1071.19	41	4	0.667	58.89	TCGCCGACCGACAGCCAAGCCGACCAAGCTGACTGATCGGTCGGCG/TCGCCGACCGACAGCCAAGCCGACCAAGCTGACTGATCGGTCGGCG	0.12	12	39	579,39,0
Cbriggsae	HK104	MAL296	IV	1468730	INDEL	31	predicted		T	TAAAGGAGGTAGGGTAGCCAAAAGTTGCGAGA	268.57	39	2	0.333	60	T/T	21	21	18	0,18,270
Cbriggsae	HK104	MAL296	IV	1760483	INDEL	-3	false_positive	IV-1_6	ATTT	A	135.72	10	2	0.333	41.73	ATTT/ATTT	3	3	9	0,9,82
Cbriggsae	HK104	MAL296	IV	2102378	INDEL	42	predicted		C	CTGACAGAGAAATGGATATGTGCGAATGGTCCG,CTGACAGAGAAATGGATATGTGCGAATGGTCCGATCGTATGAA	1066.91	26	4.2	0.667,0.333	60	CTGACAGAGAAATGGATATGTGCGAATGGTCCG/CTGACAGAGAAATGGATATGTGCGAATGGTCCG	0,5,0	5	15	225,15,0,225,15,225
Cbriggsae	HK104	MAL296	IV	2302619	INDEL	-34	predicted		TTAGAGCATAATTATTTCATGTAAAACCCGGTGGG	T	997.1	59	2	0.333	60.9	TTAGAGCATAATTATTTCATGTAAAACCCGGTGGG/TTAGAGCATAATTATTTCATGTAAAACCCGGTGGG	12	12	33	0,33,495
Cbriggsae	HK104	MAL296	IV	3140280	SNP	0	validated	IV-1_1	C	T	346.15	39	2	0.333	60	C/C	12	12	30	0,30,450
Cbriggsae	HK104	MAL296	IV	4054747	INDEL	37	predicted		G	GAAAATACTTTGAGATCTTCCTTCCCTTCTTAAGTAGA,GAAAATACTTTGAGATCT	547.12	12	4.2	0.667,0.333	60	GAAAATACTTTGAGATCTTCCTTCCCTTCTTAAGTAGA/GAAAATACTTTGAGATCTTCCTTCCCTTCTTAAGTAGA	0,4,0	4	11	178,11,0,179,12,180
Cbriggsae	HK104	MAL296	IV	4228688	SNP	0	validated	IV-1_2	C	T	590.15	54	2	0.333	60	C/C	10	10	30	0,30,298
Cbriggsae	HK104	MAL296	IV	4345548	INDEL	34	predicted		A	ATTTTCTAGCGACAAAAACGAAAGACAATTTTTCT	447.85	15	5	0.833	60	ATTTTCTAGCGACAAAAACGAAAGACAATTTTTCT/ATTTTCTAGCGACAAAAACGAAAGACAATTTTTCT	0.4	4	12	178,12,0
Cbriggsae	HK104	MAL296	IV	5862380	INDEL	45	predicted		TTAA	TAAAGGTGGGGGGACAGGAGTTTTTTTGTAGCTAGACCATGCATTCTAA,T	739.16	37	2.2	0.333,0.333	60	TTAA/TTAA	18,0,0	18	30	0,30,450,30,450,450
Cbriggsae	HK104	MAL296	IV	6041533	INDEL	20	predicted		C	CAGTTGGCGCCGCCCACTACA	723.96	26	5	0.833	55.15	CAGTTGGCGCCGCCCACTACA/CAGTTGGCGCCGCCCACTACA	0.4	4	17	269,17,0
Cbriggsae	HK104	MAL296	IV	6403399	INDEL	53	predicted		G	GTAGTATAGTAATGAGGGGTTATAGTACCGTTTCCGTTTTTCGCCATTTTTTGA	577.13	47	4	0.667	60	G/G	20	20	0	0,0,71
Cbriggsae	HK104	MAL296	IV	6659754	INDEL	8	predicted		T	TAAGGCACA	224.78	41	2	0.333	60	T/T	28	28	57	0,57,855
Cbriggsae	HK104	MAL296	IV	6659756	INDEL	13	predicted		A	ATAAAAAAGGAGAG	224.78	39	2	0.333	60	A/A	28	28	57	0,57,855
Cbriggsae	HK104	MAL296	IV	6761791	SNP	0	predicted		G	T	291.15	58	2	0.333	60	G/G	22	22	60	0,60,900
Cbriggsae	HK104	MAL296	IV	6891735	SNP	0	validated	IV-1_3	T	G	1259.14	90	2	0.333	60	T/T	23	23	63	0,63,664	yes	Cbr-sfrp-1 (CBG05456)	N59H in Cbr-SFRP1a
Cbriggsae	HK104	MAL296	IV	8043524	INDEL	42	predicted		A	AAGCTTTGAAATGTTGACACTGCTTCCGTTTTTTTATTCCTTC,AAGCTTTGAAATGTTGACACTGCTTCCGTTT	668.01	16	4.2	0.667,0.333	60	AAGCTTTGAAATGTTGACACTGCTTCCGTTTTTTTATTCCTTC/AAGCTTTGAAATGTTGACACTGCTTCCGTTTTTTTATTCCTTC	0,7,0	7	21	315,21,0,315,21,315
Cbriggsae	HK104	MAL296	IV	8701344	SNP	0	predicted		G	A	161.34	25	2	0.333	60	G/G	7	7	18	0,18,270
Cbriggsae	HK104	MAL296	IV	8899309	SNP	0	validated	IV-2-3	G	T	408.14	78	2	0.333	60	G/G	36	36	99	0,99,1485
Cbriggsae	HK104	MAL296	IV	9161439	SNP	0	predicted		T	C	712.14	76	2	0.333	60	T/T	30	30	81	0,81,1215
Cbriggsae	HK104	MAL296	IV	9375378	INDEL	3	predicted		C	CTGT	272.65	36	3	0.5	48.87	C/C	12	12	3	0,3,45
Cbriggsae	HK104	MAL296	IV	10781491	SNP	0	predicted		G	C	273.09	33	2	0.333	60	G/G	13	13	8	0,8,355
Cbriggsae	HK104	MAL296	IV	11685432	SNP	0	validated	IV-2-4	C	T	576.14	56	2	0.333	60	C/C	19	19	54	0,54,810
Cbriggsae	HK104	MAL296	IV	12199592	SNP	0	predicted		G	A	928.14	79	2	0.333	60	G/G	27	27	72	0,72,1080
Cbriggsae	HK104	MAL296	IV	12983933	INDEL	9	predicted		A	AGATTGTCCG,AGATTGTC	453.2	13	4.2	0.667,0.333	58.85	AGATTGTCCG/AGATTGTCCG	0,4,0	4	12	177,12,0,177,12,177
Cbriggsae	HK104	MAL296	IV	13820309	INDEL	28	predicted		G	GTTCTAAATTCTATCTGCAACCTATAAAA	263.8	34	2	0.333	60	G/G	9	9	18	0,18,270
Cbriggsae	HK104	MAL296	IV	14091133	SNP	0	validated	IV-2-2	A	T	1346.17	63	2	0.333	60	A/A	14	14	24	0,24,338
Cbriggsae	HK104	MAL296	IV	14135650	INDEL	-5	predicted		TAAACA	T	493.52	26	4	0.667	60	T/T	0.7	7	21	315,21,0
Cbriggsae	HK104	MAL296	IV	14246481	INDEL	1	predicted		G	GC	1533.17	94	4	0.667	60.05	GC/GC	0.9	9	20	396,20,0
Cbriggsae	HK104	MAL296	IV	14633478	INDEL	1	predicted		T	TA	177.17	25	2	0.333	60	T/T	7	7	15	0,15,225
Cbriggsae	HK104	MAL296	IV	15232941	INDEL	1	predicted		A	AC	607.87	54	2	0.333	60	A/A	15	15	9	0,9,135
Cbriggsae	HK104	MAL296	IV	15273933	INDEL	42	predicted		C	CTATGGAAGAGTTCCAGGACTACAAAACTGCCATAGAGCTGAA,CTATGGAAGAGTTCCAGGACTACAAAACTGCCATAGAGCTG	411.3	19	2.2	0.333,0.333	60	CTATGGAAGAGTTCCAGGACTACAAAACTGCCATAGAGCTGAA/CTATGGAAGAGTTCCAGGACTACAAAACTGCCATAGAGCTGAA	0,3,0	3	9	134,9,0,135,9,135
Cbriggsae	HK104	MAL296	IV	15456656	INDEL	63	predicted		G	GCTTTAATGAGCCTAAACATGACTATATTTGGAAAACTTGAAATTTTGGGAAAAAAAAACCAGA	539.39	33	2	0.333	60	G/G	13	13	9	0,9,135
Cbriggsae	HK104	MAL296	IV	15999509	INDEL	7	predicted		A	ACCCC,ACCCCCC,ACCCCCCC	661.97	13	2,2,1	0.333,0.333,0.167	60	ACCCC/ACCCC	0,4,0,0	4	18	261,18,0,261,18,261,261,18,261,261
Cbriggsae	HK104	MAL296	IV	16434328	SNP	0	predicted		T	C	196.38	43	4	0.667	60	T/T	20	20	0	0,0,86
Cbriggsae	HK104	MAL296	IV	16434330	INDEL	28	predicted		A	AAGCGAGTTATGGCTTAACTTGTTCATAG	178.76	45	2	0.333	60	A/A	21	21	39	0,39,585
Cbriggsae	HK104	MAL296	IV	16776425	INDEL	27	predicted		A	ATATAAAACGCTAGACGCGTCTGTTGGT	250.68	26	2	0.333	60	A/A	8	8	12	0,12,180
Cbriggsae	HK104	MAL296	IV	17482274	SNP	0	predicted		C	A	817.15	44	2	0.333	60	C/C	13	13	36	0,36,540
Cbriggsae	HK104	MAL296	Un	1284450	INDEL	13	predicted		A	ATCCGCCGTCCAAG	142.74	16	4	0.667	42.32	A/A	9	9	0	0,0,87
Cbriggsae	HK104	MAL296	Un	1310410	INDEL	6	predicted		A	ATGTGGT	456.16	17	5	0.833	34.84	ATGTGGT/ATGTGGT	0.4	4	12	180,12,0
Cbriggsae	HK104	MAL296	V	441085	INDEL	4	predicted		A	AATAC	493.11	46	2	0.333	60	A/A	13	13	39	0,39,331
Cbriggsae	HK104	MAL296	V	1834700	INDEL	16	predicted		C	CACCCCGAAAAGAGCAG	90.59	22	2	0.333	50.01	C/C	7	7	12	0,12,180
Cbriggsae	HK104	MAL296	V	2147207	INDEL	-1	predicted		TA	T	633	28	5	0.833	59.94	T/T	0.1	10	30	450,30,0
Cbriggsae	HK104	MAL296	V	2447038	INDEL	8	predicted		T	TCCCCCCC,TCCCCCCCC	1061.88	22	2.4	0.333,0.667	60.49	TCCCCCCCC/TCCCCCCCC	0,0,3	3	8	414,82,52,30,8,0
Cbriggsae	HK104	MAL296	V	2461579	SNP	0	predicted		G	C	659.14	68	2	0.333	60	G/G	22	22	60	0,60,654
Cbriggsae	HK104	MAL296	V	3576319	INDEL	25	predicted		T	TTATGACGTCTTCTTTTTGTTGCCAA	322.17	40	4	0.667	54.43	T/T	21	21	0	0,0,268
Cbriggsae	HK104	MAL296	V	3780560	INDEL	4	predicted		T	TTACA	954.1	69	2	0.333	60	T/T	24	24	60	0,60,900
Cbriggsae	HK104	MAL296	V	3893992	INDEL	21	predicted		GCA	G,GTTTCTAATGCGTTTTCCAGGACA	768.57	22	2.2	0.333,0.333	60	G/G	0,9,0	9	27	405,27,0,405,27,405
Cbriggsae	HK104	MAL296	V	4639532	INDEL	14	predicted		A	AAGGTGGGGGGACAT	179.21	24	2	0.333	60	A/A	10	10	12	0,12,180
Cbriggsae	HK104	MAL296	V	4672357	INDEL	-2	predicted		GTC	G	135.72	12	2	0.333	36.77	GTC/GTC	4	4	9	0,9,135
Cbriggsae	HK104	MAL296	V	4788171	INDEL	44	predicted		A	ACATGCAGACACACTTAGATTATGAAATTAATTT,ACATGCAGACACACTTAGATTATGAAAT,ACATGCAGACACACTTAGATTATGAAATTAATTTTTCTTTTGATG	985.93	24	2,2,2	0.333,0.333,0.333	60	ACATGCAGACACACTTAGATTATGAAATTAATTT/ACATGCAGACACACTTAGATTATGAAATTAATTT	0,6,0,0	6	18	269,18,0,270,18,270,270,18,270,270
Cbriggsae	HK104	MAL296	V	5168185	INDEL	10	predicted		A	ATTTTTTTTT,ATTTTTTTTTT	324.99	17	2.2	0.333,0.333	60	ATTTTTTTTT/ATTTTTTTTT	0,5,0	5	15	225,15,0,225,15,225
Cbriggsae	HK104	MAL296	V	5477589	INDEL	6	predicted		A	ATAATTC	1171.64	42	5	0.833	59.38	ATAATTC/ATAATTC	0.17	17	51	765,51,0
Cbriggsae	HK104	MAL296	V	6021081	INDEL	22	predicted		G	GCAGGGTTGCAATCTGACGGGCT	92.14	13	2	0.333	60	G/G	7	7	9	0,9,135
Cbriggsae	HK104	MAL296	V	6071152	INDEL	6	predicted		A	ATACATG	979.1	68	2	0.333	60	A/A	17	17	48	0,48,720
Cbriggsae	HK104	MAL296	V	6137072	SNP	0	predicted		C	A	570.14	68	2	0.333	60	C/C	19	19	54	0,54,810
Cbriggsae	HK104	MAL296	V	6425406	INDEL	60	predicted		C	CTGAACTTTTTCAAATCAAAATTTATACCTTTTTCTCGTCTAGCGCTACATATCTAAATTA,CT	672.34	30	2.2	0.333,0.333	60	CTGAACTTTTTCAAATCAAAATTTATACCTTTTTCTCGTCTAGCGCTACATATCTAAATTA/CTGAACTTTTTCAAATCAAAATTTATACCTTTTTCTCGTCTAGCGCTACATATCTAAATTA	0,8,0	8	23	358,23,0,359,24,360
Cbriggsae	HK104	MAL296	V	6507824	SNP	0	validated	V-1	G	A	803.14	89	2	0.333	60	G/G	30	30	81	0,81,1215
Cbriggsae	HK104	MAL296	V	6607444	INDEL	4	predicted		G	GTACA	837.1	60	2	0.333	60.51	G/G	16	16	39	0,39,585
Cbriggsae	HK104	MAL296	V	8696366	SNP	0	predicted		A	T	303.15	59	2	0.333	55.45	A/A	29	29	75	0,75,1125
Cbriggsae	HK104	MAL296	V	8990028	SNP	0	predicted		G	T	799.14	79	2	0.333	60	G/G	26	26	66	0,66,990
Cbriggsae	HK104	MAL296	V	9076314	INDEL	54	predicted		G	GAGCTCAAATTTGATAGTGTGGGGGCCCTTAACTTGAAATTGGGGGGGGGGGCT,GAGCTCAAATTTGATAGTGTGGGGGCCCTTAACTTGAAATTGGGGGGGGGGGGCT	3020.86	31	4.2	0.667,0.333	57.98	GAGCTCAAATTTGATAGTGTGGGGGCCCTTAACTTGAAATTGGGGGGGGGGGCT/GAGCTCAAATTTGATAGTGTGGGGGCCCTTAACTTGAAATTGGGGGGGGGGGCT	0,13,0	13	86	1302,86,0,1303,87,1303
Cbriggsae	HK104	MAL296	V	12181238	INDEL	19	predicted		T	TACCGTAAAACCTCTAATAG	181.98	13	2	0.333	47	T/T	5	5	9	0,9,135
Cbriggsae	HK104	MAL296	V	12190967	INDEL	76	predicted		A	ATCCCAACCGTCAACTTTGAGCTCCCTTTTTTCGATCCCTGTGAAAGATATCAAAAAGCGGTCAACTGATAAATTAT	1983.88	50	5	0.833	57.13	ATCCCAACCGTCAACTTTGAGCTCCCTTTTTTCGATCCCTGTGAAAGATATCAAAAAGCGGTCAACTGATAAATTAT/ATCCCAACCGTCAACTTTGAGCTCCCTTTTTTCGATCCCTGTGAAAGATATCAAAAAGCGGTCAACTGATAAATTAT	0.13	13	48	719,48,0
Cbriggsae	HK104	MAL296	V	12593018	INDEL	32	predicted		C	CAGTACTGGCCAAAAAGGTATTCGCAAATAGTT	134.29	53	2	0.333	60	C/C	18	18	48	0,48,720
Cbriggsae	HK104	MAL296	V	12838829	INDEL	2	predicted		T	TAC	306.24	80	2	0.333	60	T/T	33	33	90	0,90,1350
Cbriggsae	HK104	MAL296	V	12838831	INDEL	32	predicted		G	GTACTGGCCAAAAAGGTATTCGCAAATAGTTTT	306.24	80	2	0.333	60	G/G	33	33	84	0,84,1260
Cbriggsae	HK104	MAL296	V	12877919	INDEL	21	predicted		C	CTTGGTGGATTACGTACTACCG,CTTGGTGGATTACG	412.9	23	2.2	0.333,0.333	58.17	CTTGGTGGATTACGTACTACCG/CTTGGTGGATTACGTACTACCG	0,7,0	7	21	314,21,0,315,21,315
Cbriggsae	HK104	MAL296	V	12998409	SNP	0	predicted		A	C	665.14	71	2	0.333	60	A/A	26	26	69	0,69,1035
Cbriggsae	HK104	MAL296	V	13010772	SNP	0	validated	V-2	G	T	729.14	91	2	0.333	60	G/G	30	30	84	0,84,1260
Cbriggsae	HK104	MAL296	V	13498649	INDEL	13	predicted		A	ACCGTAAAACCTCT	67.43	21	2	0.333	60	A/A	12	12	21	0,21,315
Cbriggsae	HK104	MAL296	V	13615815	INDEL	36	predicted		T	TGCAGGTTTCACGGTATTTCAGTTTAGTCGAAGTCTC	267.31	42	2	0.333	60	T/T	15	15	24	0,24,360
Cbriggsae	HK104	MAL296	V	13785976	INDEL	20	predicted		C	CACGAGTATTCCA,CACGAGTATTCCAGAGATCCT,CACGA	863.95	20	2,2,2	0.333,0.333,0.333	60	CACGAGTATTCCA/CACGAGTATTCCA	0,4,0,0	4	12	180,12,0,180,12,180,180,12,180,180
Cbriggsae	HK104	MAL296	V	14405900	SNP	0	predicted		A	T	536.14	67	2	0.333	60	A/A	26	26	72	0,72,738
Cbriggsae	HK104	MAL296	V	14439814	INDEL	-6	predicted		TAAATGC	T	1215.22	38	4	0.667	50.57	T/T	0.12	12	36	540,36,0
Cbriggsae	HK104	MAL296	V	14439848	INDEL	8	predicted		A	ATTTTTTTC	1080.22	26	4	0.667	46.52	ATTTTTTTC/ATTTTTTTC	0.1	10	33	495,33,0
Cbriggsae	HK104	MAL296	V	14439859	INDEL	-4	predicted		TCACG	T	899.3	25	4	0.667	45.02	T/T	0.1	10	30	450,30,0
Cbriggsae	HK104	MAL296	V	14439864	INDEL	-10	predicted		TGCAAGACGCG	T	853.75	25	4	0.667	44.81	T/T	0.1	10	30	450,30,0
Cbriggsae	HK104	MAL296	V	15595256	INDEL	28	predicted		C	CTGATAGGAGAAACATGCACATGTCTACA,CTGATAGGAGAAACATGCACATGT,CTGATAGGAGAAACATGCACATGTCTA	640	15	2,2,2	0.333,0.333,0.333	60	CTGATAGGAGAAACATGCACATGTCTACA/CTGATAGGAGAAACATGCACATGTCTACA	0,5,0,0	5	15	225,15,0,225,15,225,225,15,225,225
Cbriggsae	HK104	MAL296	V	15650399	INDEL	2	predicted		A	ATT	91.75	29	2	0.333	60	A/A	11	11	5	0,5,268
Cbriggsae	HK104	MAL296	V	15687178	SNP	0	predicted		A	G	1179.26	32	4	0.667	58.43	G/G	0.12	12	36	540,36,0
Cbriggsae	HK104	MAL296	V	16246672	INDEL	7	predicted		A	ACCCCC,ACCCCCCC	1134.89	23	4.2	0.667,0.333	40.63	ACCCCC/ACCCCC	0,5,0	5	18	270,18,0,270,18,270
Cbriggsae	HK104	MAL296	V	17811589	SNP	0	predicted		G	A	914.93	26	5	0.833	59.77	A/A	0.1	10	30	450,30,0
Cbriggsae	HK104	MAL296	V	17811617	SNP	0	predicted		C	T	1312.18	40	4	0.667	59.83	T/T	0.15	15	45	675,45,0
Cbriggsae	HK104	MAL296	V	18788307	SNP	0	predicted		C	G	1294.14	94	2	0.333	60	C/C	30	30	81	0,81,1215
Cbriggsae	HK104	MAL296	V	18847702	SNP	0	predicted		C	T	762.14	82	2	0.333	60	C/C	27	27	75	0,75,1125
Cbriggsae	HK104	MAL296	V	19119903	INDEL	30	predicted		A	ACCGTAAAACCTCTAATAGAACGACACCCGG	225.24	18	2	0.333	55.9	A/A	8	8	12	0,12,180
Cbriggsae	HK104	MAL296	X	172994	INDEL	45	predicted		T	TTTTTCGGGGACTTTCAGTTATGGAGTTGGACAAGTATGGGAATGC	536.12	66	2	0.333	60	T/T	19	19	27	0,27,405
Cbriggsae	HK104	MAL296	X	543075	INDEL	34	predicted		A	ACAGTACTGGCCAAAAAGGTATTCGCAAATAGTTT	133.29	71	2	0.333	60	A/A	38	38	99	0,99,1220
Cbriggsae	HK104	MAL296	X	1221793	INDEL	4	predicted		A	ATATG	988.1	59	2	0.333	60	A/A	13	13	39	0,39,365
Cbriggsae	HK104	MAL296	X	1429890	INDEL	41	predicted		C	CTCTA,CTCTAACTAAGATTTTATCTAACTAAGATTTTATCATTTAAT,CTCTAACTAAGATTTTATCTAACTAAGATTTTATCATTTA	953.9	23	2,2,2	0.333,0.333,0.333	57.29	CTCTA/CTCTA	0,8,0,0	8	24	360,24,0,360,24,360,360,24,360,360
Cbriggsae	HK104	MAL296	X	2907645	INDEL	6	predicted		T	TATCAAA	178.74	42	2	0.333	60	T/T	18	18	36	0,36,540
Cbriggsae	HK104	MAL296	X	2907649	INDEL	16	predicted		C	CGTGCCCAATAGCGTCT	134.3	40	2	0.333	60	C/C	17	17	33	0,33,495
Cbriggsae	HK104	MAL296	X	3210196	INDEL	10	predicted		A	ATTCCCCCCCC,ATTC	1411.88	26	3.2	0.500,0.333	60	ATTCCCCCCCC/ATTCCCCCCCC	0,4,0	5	12	771,57,0,145,12,89
Cbriggsae	HK104	MAL296	X	4338023	INDEL	6	predicted		G	GCCCCC,GCCCCCC	1133.87	26	4.2	0.667,0.333	60	GCCCCC/GCCCCC	0,10,0	10	33	435,33,0,435,33,435
Cbriggsae	HK104	MAL296	X	4583836	INDEL	5	predicted		A	ACCCCC,ACCCC	931.9	38	4.2	0.667,0.333	60.49	ACCCCC/ACCCCC	0,8,0	8	24	359,24,0,360,24,360
Cbriggsae	HK104	MAL296	X	5334659	INDEL	17	predicted		T	TATGGACCACATCGCGCC	268.28	31	2	0.333	57.57	T/T	14	14	36	0,36,540
Cbriggsae	HK104	MAL296	X	5334663	INDEL	7	predicted		G	GAAATCAA	178.75	30	2	0.333	56.57	G/G	15	15	39	0,39,585
Cbriggsae	HK104	MAL296	X	5343430	INDEL	1	predicted		A	AT	951.1	63	2	0.333	60.93	A/A	21	21	60	0,60,586
Cbriggsae	HK104	MAL296	X	5555501	INDEL	41	predicted		T	TCACCCTGTACTCTGTCAGCTTTGGGGTGAGCATGAAGCG,TCACCCTGTAC,TCACCCTGTACTCTGTCAGCTTTGGGGTGAGCATGAAGCGTA	617	15	2,2,2	0.333,0.333,0.333	60	TCACCCTGTACTCTGTCAGCTTTGGGGTGAGCATGAAGCG/TCACCCTGTACTCTGTCAGCTTTGGGGTGAGCATGAAGCG	0,6,0,0	6	18	270,18,0,270,18,270,270,18,270,270
Cbriggsae	HK104	MAL296	X	5592618	INDEL	-2	predicted		TGG	T	2144.19	54	4	0.667	60.58	T/T	0.19	19	81	1215,81,0
Cbriggsae	HK104	MAL296	X	6080686	INDEL	3	predicted		A	ACCG	359.27	21	4	0.667	60	ACCG/ACCG	0.6	6	18	270,18,0
Cbriggsae	HK104	MAL296	X	6450543	SNP	0	validated	X-1	G	A	622.14	82	2	0.333	60	G/G	36	36	99	0,99,1485
Cbriggsae	HK104	MAL296	X	6580540	INDEL	34	predicted		T	TCCTGCGAACCAGACATGAGCGGAATTCCTTATTC,TCCTGCGAACCAGACATGAGCGGAATTC	448.74	34	2.1	0.333,0.167	59.4	TCCTGCGAACCAGACATGAGCGGAATTCCTTATTC/TCCTGCGAACCAGACATGAGCGGAATTCCTTATTC	0,8,0	8	24	360,24,0,360,24,360
Cbriggsae	HK104	MAL296	X	6633093	SNP	0	predicted		G	A	637.14	57	2	0.333	59.87	G/G	18	18	45	0,45,675
Cbriggsae	HK104	MAL296	X	6709286	INDEL	45	predicted		ATT	AAACATACTACATCTCGTATCTGAAAAATTTCGCGTCTCACCTCTTTT,A	749.31	35	2.1	0.333,0.167	60	ATT/ATT	17,0,0	17	18	0,18,270,18,270,270
Cbriggsae	HK104	MAL296	X	7172909	INDEL	-2	predicted		CTT	C	314.66	15	4	0.667	60	C/C	0.5	5	15	225,15,0
Cbriggsae	HK104	MAL296	X	8536557	INDEL	4	predicted		T	TAACC	170.13	39	2	0.333	60	T/T	15	15	24	0,24,360
Cbriggsae	HK104	MAL296	X	8924724	SNP	0	predicted		T	A	442.14	50	2	0.333	60	T/T	20	20	54	0,54,810
Cbriggsae	HK104	MAL296	X	11368005	SNP	0	predicted		C	T	1053.14	91	2	0.333	60	C/C	21	21	60	0,60,900
Cbriggsae	HK104	MAL296	X	14256370	INDEL	4	predicted		T	TTACA	1214.1	75	2	0.333	60.77	T/T	23	23	63	0,63,630
Cbriggsae	HK104	MAL296	X	14479122	SNP	0	validated	X-2	A	G	844.14	72	2	0.333	60	A/A	23	23	63	0,63,945
Cbriggsae	HK104	MAL296	X	14759610	INDEL	2	predicted		C	CTT	765.39	22	4	0.667	58.12	CTT/CTT	0.13	13	39	585,39,0
Cbriggsae	HK104	MAL296	X	14759614	INDEL	-1	predicted		TC	T	765.39	22	4	0.667	58.12	T/T	0.13	13	39	585,39,0
Cbriggsae	HK104	MAL296	X	15979601	INDEL	4	predicted		G	GATCA	502.13	46	4	0.667	60	G/G	13	13	0	0,0,140
Cbriggsae	HK104	MAL296	X	16139519	INDEL	-15	predicted		AAATTGTCGGTTTCTG	C	1109.93	25	4.2	0.667,0.333	60	AAATTGTCGGTTTCTG/AAATTGTCGGTTTCTG	0,6,0	6	18	270,18,0,270,18,270
Cbriggsae	HK104	MAL296	X	16167205	INDEL	26	predicted		A	ACAGTACCGGACAAAAAGAAATCAAC,ACAGTACCGGACAAAAAGAAATCAACT	383.21	23	2.2	0.333,0.333	60	A/A	13,0,0	13	18	0,18,270,18,270,270
Cbriggsae	HK104	MAL296	X	16638891	INDEL	43	predicted		G	GGTGGGA,GGTGGGACAGCATATAAAATTGGGAAGAATTCATGAAAATAAAA	1077.89	38	4.2	0.667,0.333	60	GGTGGGA/GGTGGGA	0,7,0	7	20	313,20,0,314,21,315
Cbriggsae	HK104	MAL296	X	17019901	SNP	0	predicted		A	C	679.14	70	2	0.333	60	A/A	25	25	60	0,60,900
Cbriggsae	HK104	MAL296	X	17106391	SNP	0	predicted		T	C	277.31	99	2	0.333	38.13	T/T	53	53	51	0,51,765
Cbriggsae	HK104	MAL296	X	17106393	SNP	0	predicted		G	A	277.31	96	2	0.333	38.13	G/G	51	51	48	0,48,720
Cbriggsae	HK104	MAL296	X	17106394	SNP	0	predicted		A	T	277.36	91	2	0.333	38.13	A/A	49	49	45	0,45,675
Cbriggsae	HK104	MAL296	X	17106399	SNP	0	predicted		T	C	234.06	87	2	0.333	37.81	T/T	47	47	15	0,15,225
Cbriggsae	HK104	MAL296	X	18014065	INDEL	23	predicted		C	CAATACACAACGATTCAAGCGCAA	255.2	39	2	0.333	60	C/C	25	25	30	0,30,450
Cbriggsae	HK104	MAL296	X	19551170	INDEL	13	predicted		T	TTCCTCAGGCCCGG	78.39	30	2	0.333	60	T/T	9	9	15	0,15,225
Cbriggsae	HK104	MAL296	X	21046543	INDEL	19	predicted		C	CTTTGTCACTCTGTTTGTTT	346.15	41	4	0.667	60	C/C	19	19	0	0,0,146
Cbriggsae	HK104	MAL211	I	739968	INDEL	38	predicted		T	TATGTGA,TATGTGATTTCAAGCTTTCAAAGGGCGAATAACGAGAAC	987.32	38	2.2	0.333,0.333	55.68	TATGTGA/TATGTGA	0,16,0	16	48	719,48,0,720,48,720
Cbriggsae	HK104	MAL211	I	1494327	SNP	0	predicted		C	T	231.67	35	2	0.333	59.46	C/C	13	13	33	0,33,495
Cbriggsae	HK104	MAL211	I	1494334	SNP	0	predicted		C	T	230.66	31	2	0.333	60	C/C	12	12	27	0,27,405
Cbriggsae	HK104	MAL211	I	1494338	SNP	0	predicted		C	G	230.63	34	2	0.333	60	C/C	12	12	21	0,21,315
Cbriggsae	HK104	MAL211	I	1494341	SNP	0	predicted		T	A,C	1501.93	38	4.2	0.667,0.333	58.2	A/A	0,15,0	15	45	675,45,0,675,45,675
Cbriggsae	HK104	MAL211	I	1494349	SNP	0	predicted		A	T	230.93	35	2	0.333	60	A/A	10	10	12	0,12,180
Cbriggsae	HK104	MAL211	I	1494361	SNP	0	predicted		T	A	141.68	38	2	0.333	60	T/T	9	9	18	0,18,270
Cbriggsae	HK104	MAL211	I	1909024	SNP	0	predicted		A	G	465.2	37	5	0.833	60	G/G	0.4	4	12	180,12,0
Cbriggsae	HK104	MAL211	I	2271550	INDEL	10	predicted		A	ATTTTTTTTTT	543.7	16	5	0.833	48.49	ATTTTTTTTTT/ATTTTTTTTTT	0.8	8	24	360,24,0
Cbriggsae	HK104	MAL211	I	2271562	INDEL	-14	predicted		TGAGGTACCGCCGAC	T	543.7	16	5	0.833	48.49	T/T	0.8	8	24	360,24,0
Cbriggsae	HK104	MAL211	I	2320738	INDEL	87	predicted		T	TTTTCTTCAAAAAAATCCGGATTGTTTTAAAATTAATTTATTTATTTGAACAAAAAATGTCGGATCCGGATTTTTCGTGATTTTACGG	1132.13	48	4	0.667	59.56	T/T	21	21	0	0,0,153
Cbriggsae	HK104	MAL211	I	2469391	INDEL	7	predicted		A	ACCCCC,ACCCC,ACCCCCCC	1007.89	21	2,2,2	0.333,0.333,0.333	60.51	ACCCCC/ACCCCC	0,8,0,0	8	27	383,27,0,383,27,383,383,27,383,383
Cbriggsae	HK104	MAL211	I	2928149	INDEL	21	predicted		T	TAGAGTATGCATTCTAC,TAGAGTATGCATTCTACCGTGA	319.11	13	1.2	0.167,0.333	50.99	TAGAGTATGCATTCTAC/TAGAGTATGCATTCTAC	0,3,0	3	9	134,9,0,135,9,135
Cbriggsae	HK104	MAL211	I	3974805	SNP	0	predicted		T	A	1125.14	79	2	0.333	60	T/T	21	21	51	0,51,765
Cbriggsae	HK104	MAL211	I	3974806	INDEL	-3	predicted		GCGA	G	1116.1	78	2	0.333	60	GCGA/GCGA	22	22	40	0,40,630
Cbriggsae	HK104	MAL211	I	3974808	SNP	0	predicted		G	A,*	3550.9	80	4.2	0.667,0.333	49.3	A/A	0,22,0	22	69	1005,69,0,1005,69,1005
Cbriggsae	HK104	MAL211	I	3974809	SNP	0	predicted		A	G,*	3550.9	81	4.2	0.667,0.333	49.44	G/G	0,23,0	23	69	1005,69,0,1005,69,1005
Cbriggsae	HK104	MAL211	I	4375087	SNP	0	predicted		T	G	701.14	72	2	0.333	60	T/T	22	22	63	0,63,945
Cbriggsae	HK104	MAL211	I	6054497	INDEL	4	predicted		G	GTACA	272.35	45	3	0.5	60	G/G	15	15	0	0,0,27
Cbriggsae	HK104	MAL211	I	6981595	SNP	0	predicted		C	T	666.15	53	2	0.333	60	C/C	20	20	54	0,54,810
Cbriggsae	HK104	MAL211	I	10375573	INDEL	2	predicted		C	CAT	232.29	17	4	0.667	41.04	C/C	5	5	0	0,0,77
Cbriggsae	HK104	MAL211	I	10375574	INDEL	20	predicted		G	GCGCGCATATAGCGTACTATA	675.03	14	4.2	0.667,0.333	48.09	A/A	0,4,0	4	12	153,12,0,153,12,153
Cbriggsae	HK104	MAL211	I	10431545	INDEL	34	predicted		T	TTGAATATACCTTACAACCTGTATTAGAAGGG,TTGAATATACCTTACAACCTGTATTAGAAGGGCCC	550.09	13	4.2	0.667,0.333	60	TTGAATATACCTTACAACCTGTATTAGAAGGG/TTGAATATACCTTACAACCTGTATTAGAAGGG	0,4,0	4	12	180,12,0,180,12,180
Cbriggsae	HK104	MAL211	I	10579669	INDEL	22	predicted		T	TCCAGAACAGAACGCGGACAGAA,TCCAGAACAGAACGCGGACAGA	462.2	11	4.1	0.667,0.167	60	TCCAGAACAGAACGCGGACAGAA/TCCAGAACAGAACGCGGACAGAA	0,5,0	5	15	225,15,0,225,15,225
Cbriggsae	HK104	MAL211	I	10787967	INDEL	16	predicted		A	ATTTAATTTAATTTAAT	157.46	32	2	0.333	60	A/A	9	9	9	0,9,135
Cbriggsae	HK104	MAL211	I	10825841	INDEL	3	predicted		T	TAGG	1244.55	52	5	0.833	60	TAGG/TAGG	0.13	13	39	566,39,0
Cbriggsae	HK104	MAL211	I	10961141	INDEL	35	predicted		A	ACCTAAAATGTTGTGTTACGTACAGTGAT,ACCTAAAATGTTGTGTTACGTAC,ACCTAAAATGTTGTGTTACGTACAGTGATACGTGAT	675.01	19	2,2,2	0.333,0.333,0.333	60	ACCTAAAATGTTGTGTTACGTACAGTGAT/ACCTAAAATGTTGTGTTACGTACAGTGAT	0,5,0,0	5	14	223,14,0,224,15,225,224,15,225,225
Cbriggsae	HK104	MAL211	I	12813935	SNP	0	predicted		A	G	709.14	72	2	0.333	60	A/A	29	29	75	0,75,1125
Cbriggsae	HK104	MAL211	I	13002412	INDEL	1	predicted		A	AT	538.88	17	4	0.667	31.05	AT/AT	0.6	6	21	315,21,0
Cbriggsae	HK104	MAL211	I	13460397	INDEL	-2	predicted		TTC	T	205.65	15	2	0.333	60	TTC/TTC	4	4	9	0,9,135
Cbriggsae	HK104	MAL211	I	13737833	INDEL	4	predicted		T	TGGGG,TGGG	2484.86	55	4.2	0.667,0.333	60	TGGGG/TGGGG	0,18,0	18	81	1202,81,0,1202,81,1202
Cbriggsae	HK104	MAL211	I	13828015	INDEL	7	predicted		T	TGGGGGGG,TGGGGGG	1399.51	35	2.2	0.333,0.333	59.39	TGGGGGGG/TGGGGGGG	0,13,0	13	60	900,60,0,900,60,900
Cbriggsae	HK104	MAL211	I	15082946	INDEL	8	predicted		G	GTAGGCGCC	158.84	26	2	0.333	60	G/G	10	10	21	0,21,315
Cbriggsae	HK104	MAL211	II	7727	INDEL	60	predicted		T	TCTGGACATCTCTGGCATGGGCACATCAGGAGACATATTTCGCTTTCTTCACACTCTCACC	399.17	51	2	0.333	60	T/T	25	25	45	0,45,675
Cbriggsae	HK104	MAL211	II	135529	INDEL	4	predicted		A	ATATG	1479.1	79	2	0.333	60	A/A	22	22	57	0,57,855
Cbriggsae	HK104	MAL211	II	1680973	INDEL	4	predicted		C	CCATA	970.1	70	2	0.333	60	C/C	23	23	41	0,41,632
Cbriggsae	HK104	MAL211	II	1940440	INDEL	4	predicted		A	ATATG	939.1	67	2	0.333	60	A/A	20	20	48	0,48,720
Cbriggsae	HK104	MAL211	II	2307275	INDEL	29	predicted		A	ACCGTAAAACCTCTAATAGAACGACACCCG	179.47	23	2	0.333	60	A/A	13	13	24	0,24,360
Cbriggsae	HK104	MAL211	II	2549750	SNP	0	predicted		T	C	194.97	25	2	0.333	37.04	T/T	8	8	24	0,24,220
Cbriggsae	HK104	MAL211	II	3193329	INDEL	69	predicted		T	TAATACCAAAATTTACCCCAACCGTATACCAAGTCTACCGAGCCCACTACAGGCCGGCGCACAACCCGGC,TAA	403.38	20	2.1	0.333,0.167	57.36	T/T	10,0,0	10	18	0,18,270,18,270,270
Cbriggsae	HK104	MAL211	II	3343616	INDEL	69	predicted		A	ATTTGAATTGGGTATTCTCTACTAGTACTCGGAAGAAAAAAGGTTTTGAAATTCTTCTTCC,ATTTGAATTGGGTATTCTCTACTAGTACTCGGAAGAAAAAAGGTTTTGAAATTCTTCTTCCCAGATGTTT	765.25	30	2.2	0.333,0.333	58.33	ATTTGAATTGGGTATTCTCTACTAGTACTCGGAAGAAAAAAGGTTTTGAAATTCTTCTTCC/ATTTGAATTGGGTATTCTCTACTAGTACTCGGAAGAAAAAAGGTTTTGAAATTCTTCTTCC	0,8,0	8	24	360,24,0,360,24,360
Cbriggsae	HK104	MAL211	II	8507413	INDEL	10	predicted		A	ACCGTAAAACC	223.49	38	2	0.333	60	A/A	21	21	30	0,30,450
Cbriggsae	HK104	MAL211	II	10485997	INDEL	4	predicted		T	TATAC	1207.1	92	2	0.333	60	T/T	35	35	90	0,90,1350
Cbriggsae	HK104	MAL211	II	10540594	INDEL	53	predicted		C	CTCCCAAACAATTCGGAAAATTATAATTTTTGACACTGAAAAAATTGTCTGAAA	763.34	35	4	0.667	60	CTCCCAAACAATTCGGAAAATTATAATTTTTGACACTGAAAAAATTGTCTGAAA/CTCCCAAACAATTCGGAAAATTATAATTTTTGACACTGAAAAAATTGTCTGAAA	0.7	7	21	315,21,0
Cbriggsae	HK104	MAL211	II	11188500	INDEL	1	predicted		T	TA	898.1	63	2	0.333	60	T/T	22	22	60	0,60,900
Cbriggsae	HK104	MAL211	II	11284387	SNP	0	predicted		G	T	653.14	71	2	0.333	60	G/G	25	25	72	0,72,1080
Cbriggsae	HK104	MAL211	II	12489320	INDEL	46	predicted		G	GGAATTTTGAATTTTAAATTTTTTTAAAGCTAAAAAATCAAATTTTT	400.19	50	2	0.333	60	G/G	19	19	21	0,21,315
Cbriggsae	HK104	MAL211	II	13316665	INDEL	19	predicted		G	GCGCGGTTGAAATAGGAACC,GCGC	460.2	12	4.1	0.667,0.167	51.8	GCGCGGTTGAAATAGGAACC/GCGCGGTTGAAATAGGAACC	0,4,0	4	12	180,12,0,180,12,180
Cbriggsae	HK104	MAL211	II	14012987	INDEL	14	predicted		T	TTACCGTAAAACCTC	81.92	18	2	0.333	90	T/T	5	5	15	0,15,205
Cbriggsae	HK104	MAL211	II	15040767	INDEL	5	predicted		C	CAGAGA	762.9	29	5	0.833	39.11	CAGAGA/CAGAGA	0.7	7	24	341,24,0
Cbriggsae	HK104	MAL211	II	15040771	INDEL	13	predicted		G	GAGAGGTGTCTAGT	721.68	21	5	0.833	41.82	GAGAGGTGTCTAGT/GAGAGGTGTCTAGT	0.6	6	21	315,21,0
Cbriggsae	HK104	MAL211	II	15146827	SNP	0	predicted		C	T	550.14	72	2	0.333	60	C/C	27	27	72	0,72,1080
Cbriggsae	HK104	MAL211	III	1734672	INDEL	14	predicted		A	ACACCGTCACGGTAG	358.31	14	4	0.667	40.14	ACACCGTCACGGTAG/ACACCGTCACGGTAG	0.4	4	12	180,12,0
Cbriggsae	HK104	MAL211	III	3196342	INDEL	48	predicted		G	GCAGCTAGGTCGTCGAGGGATGCATATGAGGCAGATAATTCGGAGGGTA	960.04	48	5	0.833	60	GCAGCTAGGTCGTCGAGGGATGCATATGAGGCAGATAATTCGGAGGGTA/GCAGCTAGGTCGTCGAGGGATGCATATGAGGCAGATAATTCGGAGGGTA	0.5	5	45	736,45,0
Cbriggsae	HK104	MAL211	III	3382796	INDEL	3	predicted		A	AACG	274.36	17	5	0.833	60	AACG/AACG	0.4	4	12	180,12,0
Cbriggsae	HK104	MAL211	III	3467207	INDEL	33	predicted		A	ACCGAAAAACCTCTAATAGAACGACACCCGGATC	221.13	32	2	0.333	58.76	A/A	8	8	9	0,9,135
Cbriggsae	HK104	MAL211	III	4541892	SNP	0	predicted		T	A	612.14	68	2	0.333	60	T/T	23	23	66	0,66,990
Cbriggsae	HK104	MAL211	III	6462562	INDEL	34	predicted		A	ACAGTACTGGCCAAAAAGGTATTCGCAAATAGTTT	177.74	51	2	0.333	60	A/A	21	21	45	0,45,675
Cbriggsae	HK104	MAL211	III	6676326	SNP	0	predicted		T	C	952.14	72	2	0.333	59.33	T/T	27	27	72	0,72,1080
Cbriggsae	HK104	MAL211	III	6898575	SNP	0	predicted		C	G	541.14	64	2	0.333	60	C/C	24	24	63	0,63,945
Cbriggsae	HK104	MAL211	III	7071769	INDEL	32	predicted		G	GGACGAATCTCAAAGTACATTCGGTCACCGCAA,GGACGAATCTCAAAGTACATTCGGTCA	526.14	13	2.2	0.333,0.333	68.41	GGACGAATCTCAAAGTACATTCGGTCACCGCAA/GGACGAATCTCAAAGTACATTCGGTCACCGCAA	0,5,0	5	15	225,15,0,225,15,225
Cbriggsae	HK104	MAL211	III	7118936	INDEL	36	predicted		G	GCGAGAGCCCGACTTCCAATATTCTTCGAACGCTTT,GCGAGAGCCCGACTTCCAATATTCTTCGAACGCT,GCGAGAGCCCGACTTCCAATATTCTTCGAACGCTTTT	1053.88	30	2,2,2	0.333,0.333,0.333	60	GCGAGAGCCCGACTTCCAATATTCTTCGAACGCTTT/GCGAGAGCCCGACTTCCAATATTCTTCGAACGCTTT	0,7,0,0	7	21	263,21,0,263,21,263,263,21,263,263
Cbriggsae	HK104	MAL211	III	7140337	SNP	0	predicted		G	A	420.14	46	2	0.333	42.98	G/G	14	14	42	0,42,407
Cbriggsae	HK104	MAL211	III	9610342	INDEL	-4	predicted		CAGTG	C	93.49	14	2	0.333	43.39	CAGTG/CAGTG	3	3	6	0,6,90
Cbriggsae	HK104	MAL211	III	9776981	INDEL	29	predicted		A	ACAGGGTGGCTTTTAATTATTGCAACGCAT	268.87	30	2	0.333	60	A/A	14	14	12	0,12,180
Cbriggsae	HK104	MAL211	III	9985433	SNP	0	predicted		C	A	432.14	71	2	0.333	60	C/C	21	21	63	0,63,616
Cbriggsae	HK104	MAL211	III	10206697	INDEL	2	predicted		C	CTG	1083.19	49	4	0.667	60	CTG/CTG	0.17	17	51	585,51,0
Cbriggsae	HK104	MAL211	III	10725363	SNP	0	predicted		C	T	811.14	81	2	0.333	60	C/C	34	34	90	0,90,1350
Cbriggsae	HK104	MAL211	III	11149130	INDEL	-3	predicted		CAGA	C	808.1	58	2	0.333	60	CAGA/CAGA	21	21	60	0,60,655
Cbriggsae	HK104	MAL211	III	11149133	INDEL	2	predicted		A	ACC	808.1	58	2	0.333	60	A/A	21	21	60	0,60,655
Cbriggsae	HK104	MAL211	III	11375736	INDEL	46	predicted		A	ACTCAGGCGTCGCCGGTTACTTCTAACCGGAGCTTGGCCAGATTCC,ACTCAGGCGTCGCCGGTTACTTCTAACCGGAGCTTGGCCAGATTCCG	1145.75	43	2.2	0.333,0.333	60	ACTCAGGCGTCGCCGGTTACTTCTAACCGGAGCTTGGCCAGATTCC/ACTCAGGCGTCGCCGGTTACTTCTAACCGGAGCTTGGCCAGATTCC	0,17,0	17	50	763,50,0,764,51,765
Cbriggsae	HK104	MAL211	III	11562722	INDEL	3	predicted		G	GGTT	134.48	27	2	0.333	60	G/G	10	10	15	0,15,225
Cbriggsae	HK104	MAL211	III	11640019	INDEL	10	predicted		G	GGATTCTGGAA	448.23	44	2	0.333	60	G/G	17	17	27	0,27,405
Cbriggsae	HK104	MAL211	III	11886149	INDEL	-1	predicted		AG	A	1018.1	84	2	0.333	60	AG/AG	28	28	72	0,72,1080
Cbriggsae	HK104	MAL211	III	12255910	INDEL	3	predicted		G	GCAC	93.71	22	2	0.333	40	G/G	8	8	0	0,0,143
Cbriggsae	HK104	MAL211	III	12701674	INDEL	44	predicted		T	TCGAATTTCTGTTTGATTCGATAAGTAAAATGTAGA,TCGAATTTCTGTTTGATTCGATAAGTAAAATGTAGAACTTTAAAA,TCGAATTTCTGTTTGATTCGATAAGTAAAATGTAGAACTTTAAA	795.94	20	2,2,2	0.333,0.333,0.333	60	TCGAATTTCTGTTTGATTCGATAAGTAAAATGTAGA/TCGAATTTCTGTTTGATTCGATAAGTAAAATGTAGA	0,8,0,0	8	24	358,24,0,358,24,358,358,24,358,358
Cbriggsae	HK104	MAL211	III	13489565	INDEL	43	predicted		C	CTTGAGTTCAAGCCAACGGGTCAAAAAACGCGCCCCAAATAACT	412.15	33	4	0.667	60	C/C	11	11	0	0,0,30
Cbriggsae	HK104	MAL211	III	13895090	INDEL	2	predicted		G	GAA	313.4	33	2	0.333	60	G/G	13	13	15	0,15,225
Cbriggsae	HK104	MAL211	III	14292860	INDEL	57	predicted		T	TTTGAAAACTGATTTTGAAATTTCATAAATTTCACAAAAATAGTCCTAAAGCTTATAG	301.41	43	2	0.333	60	T/T	14	14	15	0,15,225
Cbriggsae	HK104	MAL211	IV	118011	SNP	0	predicted		C	T,*	304.8	16	2.1	0.333,0.167	40.98	C/C	3,1,0	4	3	0,3,58,9,61,67
Cbriggsae	HK104	MAL211	IV	376791	INDEL	41	predicted		A	ACTAGGGAATGACTCACAGAAGATGTGG,ACTAGGGAATGACTCACAGAAGATGTGGAGTTATGGGACGAG	456.07	23	2.2	0.333,0.333	60	ACTAGGGAATGACTCACAGAAGATGTGG/ACTAGGGAATGACTCACAGAAGATGTGG	0,6,0	6	18	270,18,0,270,18,270
Cbriggsae	HK104	MAL211	IV	1149805	INDEL	62	predicted		C	CCACCGGGAAAGTGCGATTTAGCACACTTGGATTAGTGTTCGTGTTTTGAAGCTCCGCCCCGA	306.04	35	2	0.333	59.76	C/C	9	9	12	0,12,180
Cbriggsae	HK104	MAL211	IV	1372046	INDEL	14	predicted		G	GTTTTCCAATCATTT	322.92	41	4	0.667	60	G/G	19	19	0	0,0,141
Cbriggsae	HK104	MAL211	IV	1372047	SNP	0	predicted		G	T	287	38	4	0.667	60	G/G	19	19	0	0,0,141
Cbriggsae	HK104	MAL211	IV	1430868	INDEL	-27	predicted		TTTCAATCCCCTTTAATGAATGTTAGAA	T	353.72	15	2	0.333	60	TTTCAATCCCCTTTAATGAATGTTAGAA/TTTCAATCCCCTTTAATGAATGTTAGAA	3	3	9	0,9,99
Cbriggsae	HK104	MAL211	IV	2241883	INDEL	-2	predicted		TCG	T	574.12	38	2	0.333	60	TCG/TCG	11	11	30	0,30,450
Cbriggsae	HK104	MAL211	IV	3543468	INDEL	17	predicted		G	GTTTAATCACTATTTTTT	379.25	14	5	0.833	38.52	GTTTAATCACTATTTTTT/GTTTAATCACTATTTTTT	0.3	3	9	122,9,0
Cbriggsae	HK104	MAL211	IV	3603091	SNP	0	predicted		A	T	772.14	63	2	0.333	59.44	A/A	27	27	81	0,81,708
Cbriggsae	HK104	MAL211	IV	3893719	INDEL	22	predicted		T	TCATTTTATTGGTAGTTCCAAAC	69.22	24	2	0.333	73.48	T/T	4	4	12	0,12,177
Cbriggsae	HK104	MAL211	IV	3893741	INDEL	5	predicted		C	CCATTT	293.24	15	5	0.833	60	CCATTT/CCATTT	0.4	4	12	177,12,0
Cbriggsae	HK104	MAL211	IV	4134921	INDEL	9	predicted		T	TGTCTCCACA,TGTCTCC	573.11	16	4.2	0.667,0.333	56.26	TGTCTCCACA/TGTCTCCACA	0,4,0	4	12	150,12,0,150,12,150
Cbriggsae	HK104	MAL211	IV	4806866	INDEL	51	predicted		C	CATGCATCCGAAATATCCTGATTTCAAAAATCAAGAGATTCTAGAAGTCAGT	181.98	28	2	0.333	60	C/C	14	14	3	0,3,45
Cbriggsae	HK104	MAL211	IV	4944341	INDEL	-2	predicted		AAC	A	91.59	23	2	0.333	60	AAC/AAC	7	7	6	0,6,90
Cbriggsae	HK104	MAL211	IV	5257968	INDEL	5	predicted		T	TCCCCC,TCCCC	1422.89	40	4.2	0.667,0.333	60.27	TCCCCC/TCCCCC	0,6,0	6	18	253,18,0,253,18,253
Cbriggsae	HK104	MAL211	IV	5450601	INDEL	10	predicted		A	ATCAAACAAAC	313.19	30	2	0.333	58.74	A/A	13	13	39	0,39,327
Cbriggsae	HK104	MAL211	IV	5862380	INDEL	45	predicted		TTAA	TAAAGGTGGGGGGACAGGAGTTTTTTTGTAGCTAGACCATGCATTCTAA,T	739.16	37	2.2	0.333,0.333	60	TTAA/TTAA	18,0,0	18	30	0,30,450,30,450,450
Cbriggsae	HK104	MAL211	IV	5862386	INDEL	2	predicted		A	AGG	389.25	42	4	0.667	60	A/A	18	18	0	0,0,27
Cbriggsae	HK104	MAL211	IV	5862387	INDEL	5	predicted		T	TGGGGG	389.25	42	4	0.667	60	T/T	18	18	0	0,0,27
Cbriggsae	HK104	MAL211	IV	5862388	SNP	0	predicted		C	G	376.3	38	4	0.667	60	C/C	18	18	0	0,0,27
Cbriggsae	HK104	MAL211	IV	5862392	INDEL	25	predicted		G	GGAGTTTTTTTGTAGCTAGACCATGC	178.74	38	2	0.333	60	G/G	18	18	33	0,33,495
Cbriggsae	HK104	MAL211	IV	5944824	INDEL	2	predicted		T	TAC	398.12	57	2	0.333	60	T/T	22	22	57	0,57,855
Cbriggsae	HK104	MAL211	IV	5944827	INDEL	14	predicted		T	TACTGGCCAAAAAGG	374.22	57	1	0.167	60	T/T	23	23	60	0,60,900
Cbriggsae	HK104	MAL211	IV	6103391	INDEL	9	predicted		C	CTTTGTAGGA	156.74	60	2	0.333	60	C/C	24	24	39	0,39,585
Cbriggsae	HK104	MAL211	IV	6103393	INDEL	2	predicted		T	TTG	156.74	58	2	0.333	60	T/T	24	24	39	0,39,585
Cbriggsae	HK104	MAL211	IV	6342105	INDEL	1	predicted		G	GT	179.55	21	2	0.333	40	G/G	10	10	18	0,18,270
Cbriggsae	HK104	MAL211	IV	10517456	INDEL	41	predicted		A	ACCGTAAAACCTCTAATAGAACGACACCCGGATCGTCCACTT	268.52	28	2	0.333	60	A/A	10	10	15	0,15,225
Cbriggsae	HK104	MAL211	IV	12725120	SNP	0	predicted		T	A,*	684.48	25	1.4	0.167,0.667	41.24	*/*	0,0,6	6	18	270,270,270,18,18,0
Cbriggsae	HK104	MAL211	IV	12725123	SNP	0	predicted		T	G,*	684.48	25	1.4	0.167,0.667	41.24	*/*	0,0,6	6	18	270,270,270,18,18,0
Cbriggsae	HK104	MAL211	IV	12725130	SNP	0	predicted		C	G,*	684.48	25	1.4	0.167,0.667	41.24	*/*	0,0,6	6	18	270,270,270,18,18,0
Cbriggsae	HK104	MAL211	IV	12725135	SNP	0	predicted		T	A,*	684.48	25	1.4	0.167,0.667	41.24	*/*	0,0,6	6	18	270,270,270,18,18,0
Cbriggsae	HK104	MAL211	IV	12725138	INDEL	-1	predicted		GT	G,*	675.44	25	1.4	0.167,0.667	41.24	*/*	0,0,6	6	18	270,270,270,18,18,0
Cbriggsae	HK104	MAL211	IV	12725144	SNP	0	predicted		G	A	418.14	21	5	0.833	63.51	A/A	0.3	3	9	135,9,0
Cbriggsae	HK104	MAL211	IV	12778976	INDEL	1	predicted		C	CT	44.29	36	2	0.333	60	C/C	13	13	36	0,36,540
Cbriggsae	HK104	MAL211	IV	13144913	INDEL	24	predicted		A	ACCGTAAAACCTCTAATAGAACGAC	115.66	17	2	0.333	60	A/A	4	4	6	0,6,90
Cbriggsae	HK104	MAL211	IV	13823286	INDEL	65	predicted		A	ATCCGACATCTTCGTCAAATACCGTAACTGCTCCTCTAAAACACTTTTACTTTGACGCAAGTTATC	433.13	27	2	0.333	57.92	A/A	10	10	6	0,6,90
Cbriggsae	HK104	MAL211	IV	15273933	INDEL	42	predicted		C	CTATGGAAGAGTTCCAGGACTACAAAACTGCCATAGAGCTGAA,CTATGGAAGAGTTCCAGGACTACAAAACTGCCATAGAGCTG	411.3	19	2.2	0.333,0.333	60	CTATGGAAGAGTTCCAGGACTACAAAACTGCCATAGAGCTGAA/CTATGGAAGAGTTCCAGGACTACAAAACTGCCATAGAGCTGAA	0,3,0	3	9	134,9,0,135,9,135
Cbriggsae	HK104	MAL211	IV	15584377	INDEL	4	predicted		T	TTACA	583.88	24	4	0.667	60.98	TTACA/TTACA	0.3	3	9	135,9,0
Cbriggsae	HK104	MAL211	IV	15799492	INDEL	58	predicted		G	GAGCAATCCAGGTGTTACTGAAGTTTAAATCAAAAATAACGATGAGCAATCCAAAAAGA	463.65	52	1	0.167	60	G/G	23	23	33	0,33,495
Cbriggsae	HK104	MAL211	IV	15999509	INDEL	7	predicted		A	ACCCC,ACCCCCC,ACCCCCCC	661.97	13	2,2,1	0.333,0.333,0.167	60	ACCCC/ACCCC	0,4,0,0	4	18	261,18,0,261,18,261,261,18,261,261
Cbriggsae	HK104	MAL211	Un	25210	SNP	0	predicted		C	T	124.7	13	2	0.333	44.06	C/C	7	7	18	0,18,270
Cbriggsae	HK104	MAL211	Un	33629	INDEL	3	predicted		G	GATA	360.72	10	4	0.667	37.89	GATA/GATA	0.3	3	15	225,15,0
Cbriggsae	HK104	MAL211	Un	33637	INDEL	-2	predicted		GGA	G	448.49	19	4	0.667	40.71	G/G	0.5	5	15	225,15,0
Cbriggsae	HK104	MAL211	Un	76841	INDEL	-5	predicted		TTAAAA	T	474.41	16	4	0.667	39.92	T/T	0.5	5	15	167,15,0
Cbriggsae	HK104	MAL211	Un	329623	INDEL	3	predicted		G	GGCC	98.34	18	4	0.667	40	G/G	9	9	0	0,0,134
Cbriggsae	HK104	MAL211	Un	401550	SNP	0	predicted		C	T	47.31	23	2	0.333	37.81	C/C	9	9	21	0,21,315
Cbriggsae	HK104	MAL211	Un	706771	INDEL	30	predicted		G	GCGACGACCGGTCCGCCCACTTCAAGATTTA	112.39	24	2	0.333	60	G/G	8	8	18	0,18,270
Cbriggsae	HK104	MAL211	Un	1385798	INDEL	9	predicted		A	ATCAGCTATC	134.83	16	2	0.333	54.52	A/A	5	5	15	0,15,128
Cbriggsae	HK104	MAL211	Un	1901797	INDEL	-3	predicted		TGCC	T	313.44	24	2	0.333	41.94	TGCC/TGCC	8	8	21	0,21,315
Cbriggsae	HK104	MAL211	Un	1901815	SNP	0	predicted		G	A	277.31	35	2	0.333	48.52	G/G	14	14	39	0,39,585
Cbriggsae	HK104	MAL211	Un	1901844	INDEL	8	predicted		A	AGCTCCCAT	403.12	44	2	0.333	56.32	A/A	17	17	51	0,51,435
Cbriggsae	HK104	MAL211	V	325649	INDEL	14	predicted		A	AGGTGGGGGGACAGG	132.5	23	2	0.333	60	A/A	8	8	15	0,15,225
Cbriggsae	HK104	MAL211	V	413521	INDEL	-3	predicted		AGAT	A	531.12	36	2	0.333	60	AGAT/AGAT	11	11	30	0,30,450
Cbriggsae	HK104	MAL211	V	1066906	INDEL	20	predicted		G	GGTGGAGTACGGTGAAAAATT	268.37	28	2	0.333	60	G/G	11	11	21	0,21,315
Cbriggsae	HK104	MAL211	V	1203990	SNP	0	predicted		A	C	491.14	54	2	0.333	60	A/A	14	14	36	0,36,540
Cbriggsae	HK104	MAL211	V	1393612	SNP	0	predicted		A	T	335.14	44	2	0.333	60	A/A	12	12	36	0,36,351
Cbriggsae	HK104	MAL211	V	1905250	INDEL	46	predicted		A	AGGGCCCCCGTACTGTCAAGTTTGAGCCAACTTATCTCGGTCTCTGT	403.14	50	2	0.333	60	A/A	20	20	42	0,42,630
Cbriggsae	HK104	MAL211	V	1982292	INDEL	36	predicted		A	ACCGTAAAACCTCTAATAGAACGACACCCGGATCGTC	89.26	32	2	0.333	60	A/A	15	15	24	0,24,360
Cbriggsae	HK104	MAL211	V	1990023	SNP	0	predicted		G	A	682.17	50	2	0.333	47.88	G/G	18	18	23	0,23,456
Cbriggsae	HK104	MAL211	V	2449296	INDEL	14	predicted		A	ATACCGTAAAACCTC	184.66	30	3	0.5	60	A/A	11	11	3	0,3,45
Cbriggsae	HK104	MAL211	V	3146808	INDEL	3	predicted		A	ACAG	1356.26	58	2	0.333	60.35	A/A	17	17	21	0,21,315
Cbriggsae	HK104	MAL211	V	3157798	SNP	0	predicted		C	A	331.21	53	4	0.667	61.34	C/C	20	20	0	0,0,84
Cbriggsae	HK104	MAL211	V	3157800	SNP	0	predicted		T	C	331.22	54	4	0.667	61.34	T/T	21	21	0	0,0,39
Cbriggsae	HK104	MAL211	V	3465444	INDEL	31	predicted		T	TACCGTAAAACCTCTAATAGAACGACACCCGG	223.38	24	2	0.333	60	T/T	9	9	9	0,9,135
Cbriggsae	HK104	MAL211	V	3893992	INDEL	21	predicted		GCA	G,GTTTCTAATGCGTTTTCCAGGACA	768.57	22	2.2	0.333,0.333	60	G/G	0,9,0	9	27	405,27,0,405,27,405
Cbriggsae	HK104	MAL211	V	4015593	INDEL	1	predicted		A	AC	67.39	25	2	0.333	60	A/A	12	12	18	0,18,270
Cbriggsae	HK104	MAL211	V	4375839	INDEL	43	predicted		T	TACTCGGGCGTCGCGCAACTTCTGGCCGGAGGCTGGTCGGCTTC	371.4	28	2	0.333	60	T/T	13	13	9	0,9,135
Cbriggsae	HK104	MAL211	V	4389042	INDEL	5	predicted		A	AGTGTT	160.98	14	2	0.333	60	A/A	5	5	3	0,3,45
Cbriggsae	HK104	MAL211	V	4788171	INDEL	44	predicted		A	ACATGCAGACACACTTAGATTATGAAATTAATTT,ACATGCAGACACACTTAGATTATGAAAT,ACATGCAGACACACTTAGATTATGAAATTAATTTTTCTTTTGATG	985.93	24	2,2,2	0.333,0.333,0.333	60	ACATGCAGACACACTTAGATTATGAAATTAATTT/ACATGCAGACACACTTAGATTATGAAATTAATTT	0,6,0,0	6	18	269,18,0,270,18,270,270,18,270,270
Cbriggsae	HK104	MAL211	V	4854606	INDEL	62	predicted		T	TGGTCACTATTTGATATCTTGCACAGGCACCGAGAAAAATGGGCTCAAAGTTTGGGGGGGGGG	922.13	48	4	0.667	60	T/T	16	16	0	0,0,229
Cbriggsae	HK104	MAL211	V	5168185	INDEL	10	predicted		A	ATTTTTTTTT,ATTTTTTTTTT	324.99	17	2.2	0.333,0.333	60	ATTTTTTTTT/ATTTTTTTTT	0,5,0	5	15	225,15,0,225,15,225
Cbriggsae	HK104	MAL211	V	5564743	INDEL	-2	predicted		CAA	C	341.54	30	2	0.333	57.28	CAA/CAA	4	4	12	0,12,101
Cbriggsae	HK104	MAL211	V	6425406	INDEL	60	predicted		C	CTGAACTTTTTCAAATCAAAATTTATACCTTTTTCTCGTCTAGCGCTACATATCTAAATTA,CT	672.34	30	2.2	0.333,0.333	60	CTGAACTTTTTCAAATCAAAATTTATACCTTTTTCTCGTCTAGCGCTACATATCTAAATTA/CTGAACTTTTTCAAATCAAAATTTATACCTTTTTCTCGTCTAGCGCTACATATCTAAATTA	0,8,0	8	23	358,23,0,359,24,360
Cbriggsae	HK104	MAL211	V	6664783	INDEL	24	predicted		A	ATTAGGTTGGCGGGAAAGTCTTTGT	261.29	35	2	0.333	60	A/A	14	14	33	0,33,495
Cbriggsae	HK104	MAL211	V	6711251	INDEL	4	predicted		A	ATATG	1581.13	70	4	0.667	60	A/A	16	16	0	0,0,67
Cbriggsae	HK104	MAL211	V	7104845	INDEL	15	predicted		A	AAATTCGAGAACCGGC	321.42	43	2	0.333	60	A/A	16	16	9	0,9,135
Cbriggsae	HK104	MAL211	V	9365441	INDEL	9	predicted		T	TTACTAACTG	1229.1	84	2	0.333	60.42	T/T	28	28	81	0,81,1215
Cbriggsae	HK104	MAL211	V	11754476	INDEL	16	predicted		G	GGTTTATTAGATAAATT	492.86	21	4	0.667	60	GGTTTATTAGATAAATT/GGTTTATTAGATAAATT	0.3	3	9	134,9,0
Cbriggsae	HK104	MAL211	V	12061222	INDEL	38	predicted		A	ATTAGGTTGGCGGGAAAGTCTTTGTCACTCTGTTTGTTT	224.8	28	2	0.333	60	A/A	14	14	27	0,27,405
Cbriggsae	HK104	MAL211	V	12127038	INDEL	19	predicted		A	AGTACTGGCCAAAAAGGTAT	90.22	56	2	0.333	60	A/A	27	27	72	0,72,1080
Cbriggsae	HK104	MAL211	V	12877919	INDEL	21	predicted		C	CTTGGTGGATTACGTACTACCG,CTTGGTGGATTACG	412.9	23	2.2	0.333,0.333	58.17	CTTGGTGGATTACGTACTACCG/CTTGGTGGATTACGTACTACCG	0,7,0	7	21	314,21,0,315,21,315
Cbriggsae	HK104	MAL211	V	13785976	INDEL	20	predicted		C	CACGAGTATTCCA,CACGAGTATTCCAGAGATCCT,CACGA	863.95	20	2,2,2	0.333,0.333,0.333	60	CACGAGTATTCCA/CACGAGTATTCCA	0,4,0,0	4	12	180,12,0,180,12,180,180,12,180,180
Cbriggsae	HK104	MAL211	V	13912066	INDEL	4	predicted		A	ATATG	964.1	82	2	0.333	60.47	A/A	32	32	87	0,87,1305
Cbriggsae	HK104	MAL211	V	14078492	INDEL	18	predicted		T	TTAACTTTG,TTAACTTTGAAAGTTTTAA	487.14	24	4.2	0.667,0.333	54.55	TTAACTTTG/TTAACTTTG	0,3,0	3	12	164,12,0,164,12,165
Cbriggsae	HK104	MAL211	V	14536063	SNP	0	predicted		G	C	408.18	30	2	0.333	60	G/G	9	9	27	0,27,258
Cbriggsae	HK104	MAL211	V	15595256	INDEL	28	predicted		C	CTGATAGGAGAAACATGCACATGTCTACA,CTGATAGGAGAAACATGCACATGT,CTGATAGGAGAAACATGCACATGTCTA	640	15	2,2,2	0.333,0.333,0.333	60	CTGATAGGAGAAACATGCACATGTCTACA/CTGATAGGAGAAACATGCACATGTCTACA	0,5,0,0	5	15	225,15,0,225,15,225,225,15,225,225
Cbriggsae	HK104	MAL211	V	15869879	INDEL	-1	predicted		AC	A	512.1	73	2	0.333	60	AC/AC	27	27	72	0,72,1080
Cbriggsae	HK104	MAL211	V	15914005	INDEL	22	predicted		A	ACAGGTGATTCGCGAACAATCCG	134.5	30	2	0.333	60	A/A	12	12	15	0,15,225
Cbriggsae	HK104	MAL211	V	16226854	INDEL	3	predicted		A	ACTC	112.29	24	2	0.333	44.65	A/A	8	8	12	0,12,180
Cbriggsae	HK104	MAL211	V	18581341	INDEL	11	predicted		T	TGGGGGGACATG	113.52	21	2	0.333	60	T/T	8	8	15	0,15,225
Cbriggsae	HK104	MAL211	V	18897111	SNP	0	predicted		A	C	149.57	30	2	0.333	57.15	A/A	16	16	45	0,45,675
Cbriggsae	HK104	MAL211	V	18897125	SNP	0	predicted		C	A	181.32	30	2	0.333	57.57	C/C	14	14	36	0,36,540
Cbriggsae	HK104	MAL211	X	894317	INDEL	-1	predicted		AT	A	504.1	66	2	0.333	60.43	AT/AT	18	18	45	0,45,675
Cbriggsae	HK104	MAL211	X	1429890	INDEL	41	predicted		C	CTCTA,CTCTAACTAAGATTTTATCTAACTAAGATTTTATCATTTAAT,CTCTAACTAAGATTTTATCTAACTAAGATTTTATCATTTA	953.9	23	2,2,2	0.333,0.333,0.333	57.29	CTCTA/CTCTA	0,8,0,0	8	24	360,24,0,360,24,360,360,24,360,360
Cbriggsae	HK104	MAL211	X	2813609	INDEL	25	predicted		A	ACAGTACTGGCCAATAAGAATGCGTC	113.47	40	2	0.333	60	A/A	24	24	39	0,39,585
Cbriggsae	HK104	MAL211	X	3095611	INDEL	21	predicted		A	AAGGGCCCGGCAAAGGCCCCGT	226.37	20	2	0.333	60	A/A	7	7	6	0,6,90
Cbriggsae	HK104	MAL211	X	3628783	SNP	0	predicted		C	T	1163.14	85	2	0.333	60	C/C	32	32	87	0,87,1305
Cbriggsae	HK104	MAL211	X	3987585	INDEL	24	predicted		G	GGTAGCAATTAATGAACTTTATTCA	135.76	33	2	0.333	60	G/G	14	14	6	0,6,90
Cbriggsae	HK104	MAL211	X	4332496	INDEL	9	predicted		C	CCCCCCCCCT	427.53	30	4	0.667	60	C/C	13	13	0	0,0,107
Cbriggsae	HK104	MAL211	X	5136768	INDEL	26	predicted		A	ATCTCCGAGTTTTTTGCCCGAGTAAGG	181.98	22	2	0.333	60	A/A	10	10	9	0,9,135
Cbriggsae	HK104	MAL211	X	5555501	INDEL	41	predicted		T	TCACCCTGTACTCTGTCAGCTTTGGGGTGAGCATGAAGCG,TCACCCTGTAC,TCACCCTGTACTCTGTCAGCTTTGGGGTGAGCATGAAGCGTA	617	15	2,2,2	0.333,0.333,0.333	60	TCACCCTGTACTCTGTCAGCTTTGGGGTGAGCATGAAGCG/TCACCCTGTACTCTGTCAGCTTTGGGGTGAGCATGAAGCG	0,6,0,0	6	18	270,18,0,270,18,270,270,18,270,270
Cbriggsae	HK104	MAL211	X	6496226	SNP	0	predicted		A	G	412.16	72	2	0.333	60	A/A	32	32	72	0,72,1080
Cbriggsae	HK104	MAL211	X	6580537	INDEL	33	predicted		C	CATTATTCCACTCCCCGTCGACTACAACTTAATG	653.21	38	4	0.667	59.59	CATTATTCCACTCCCCGTCGACTACAACTTAATG/CATTATTCCACTCCCCGTCGACTACAACTTAATG	0.1	10	30	431,30,0
Cbriggsae	HK104	MAL211	X	6580540	INDEL	34	predicted		T	TCCTGCGAACCAGACATGAGCGGAATTCCTTATTC,TCCTGCGAACCAGACATGAGCGGAATTC	448.74	34	2.1	0.333,0.167	59.4	TCCTGCGAACCAGACATGAGCGGAATTCCTTATTC/TCCTGCGAACCAGACATGAGCGGAATTCCTTATTC	0,8,0	8	24	360,24,0,360,24,360
Cbriggsae	HK104	MAL211	X	6709286	INDEL	45	predicted		ATT	AAACATACTACATCTCGTATCTGAAAAATTTCGCGTCTCACCTCTTTT,A	749.31	35	2.1	0.333,0.167	60	ATT/ATT	17,0,0	17	18	0,18,270,18,270,270
Cbriggsae	HK104	MAL211	X	7384394	INDEL	46	predicted		T	TGGAGGGTCTGGACACTATATTTTCATATTCAAATAATGTCATAATG	586.55	39	3	0.5	60	T/T	10	10	3	0,3,45
Cbriggsae	HK104	MAL211	X	7639724	SNP	0	predicted		G	C	479.14	62	2	0.333	60	G/G	24	24	72	0,72,604
Cbriggsae	HK104	MAL211	X	8411633	INDEL	-3	predicted		GAAA	G	268.27	33	2	0.333	62.13	GAAA/GAAA	13	13	39	0,39,382
Cbriggsae	HK104	MAL211	X	8539628	SNP	0	predicted		T	G	644.14	63	2	0.333	60	T/T	18	18	48	0,48,720
Cbriggsae	HK104	MAL211	X	10060074	INDEL	-50	predicted		GAATAACTTCCATGGAATTGAAACTATAAATTGAAAAGGAAAGAAAAGAGA	G	1072.1	90	2	0.333	60	GAATAACTTCCATGGAATTGAAACTATAAATTGAAAAGGAAAGAAAAGAGA/GAATAACTTCCATGGAATTGAAACTATAAATTGAAAAGGAAAGAAAAGAGA	29	29	81	0,81,1215
Cbriggsae	HK104	MAL211	X	12149506	INDEL	33	predicted		A	ACAGTACTGGCCAAAAAGGTATTCGCAAACGATT	178.74	55	2	0.333	60	A/A	28	28	61	0,61,790
Cbriggsae	HK104	MAL211	X	12734382	INDEL	5	predicted		T	TATAAA	176.89	47	2	0.333	60	T/T	22	22	48	0,48,720
Cbriggsae	HK104	MAL211	X	12734385	INDEL	18	predicted		A	ATCAACAAAATACTACTGC	177.74	44	2	0.333	60	A/A	21	21	48	0,48,720
Cbriggsae	HK104	MAL211	X	12802352	INDEL	25	predicted		C	CTCCAATCGACTTTGTCACTACGGTG	97.52	40	4	0.667	40	C/C	18	18	0	0,0,117
Cbriggsae	HK104	MAL211	X	12914407	INDEL	10	predicted		T	TGGACCAGTAA	358.59	30	2	0.333	60	T/T	5	5	12	0,12,180
Cbriggsae	HK104	MAL211	X	13425823	SNP	0	predicted		C	T	758.14	77	2	0.333	60	C/C	22	22	60	0,60,900
Cbriggsae	HK104	MAL211	X	14897489	SNP	0	predicted		C	T	749.14	59	2	0.333	60	C/C	21	21	57	0,57,855
Cbriggsae	HK104	MAL211	X	16167205	INDEL	26	predicted		A	ACAGTACCGGACAAAAAGAAATCAAC,ACAGTACCGGACAAAAAGAAATCAACT	383.21	23	2.2	0.333,0.333	60	A/A	13,0,0	13	18	0,18,270,18,270,270
Cbriggsae	HK104	MAL211	X	16231844	INDEL	34	predicted		G	GCACGGGTCCGGCCAGGAAGGCCCGGTGGCAAAAA	87.33	27	2	0.333	50.99	G/G	13	13	24	0,24,360
Cbriggsae	HK104	MAL211	X	16416286	INDEL	11	predicted		G	GAAGGCCCGGCA	463.45	17	4	0.667	60	G/G	5	5	0	0,0,32
Cbriggsae	HK104	MAL211	X	17429121	INDEL	3	predicted		G	GTTA	583.86	17	4	0.667	55.68	GTTA/GTTA	0.6	6	24	360,24,0
Cbriggsae	HK104	MAL211	X	17429131	INDEL	-3	predicted		TAGC	T	673.8	21	4	0.667	57.88	T/T	0.9	9	27	405,27,0
Cbriggsae	HK104	MAL211	X	17680950	INDEL	9	predicted		A	AACTATTTAC	2484.43	73	4	0.667	62.17	AACTATTTAC/AACTATTTAC	0.25	25	84	1228,84,0
Cbriggsae	HK104	MAL211	X	18195764	INDEL	17	predicted		A	ATATGTCCGCGATATATG	889.1	60	2	0.333	61.43	A/A	29	29	81	0,81,868
Cbriggsae	HK104	MAL211	X	18685550	INDEL	34	predicted		T	TTCATATTTTTTTGTACTTTTCAGTTGATTTCAAG	257.87	18	2	0.333	55.34	T/T	4	4	9	0,9,135
Cbriggsae	HK104	MAL211	X	18933438	INDEL	27	predicted		G	GGACAAAAAAGCAACATAGGAACAGGGA	227.53	17	3	0.5	60	G/G	7	7	3	0,3,45
Cbriggsae	HK104	MAL211	X	19276694	INDEL	47	predicted		C	CCAGCGTTCGTGAATCACCGAATTGAGAAAAAAGTTTTCTCACATTGT	115.76	35	2	0.333	60	C/C	17	17	6	0,6,90
Cbriggsae	HK104	MAL211	X	20648630	INDEL	19	predicted		T	TACCACAATTATGCGCGCAA	606.55	39	2	0.333	60	T/T	11	11	21	0,21,315
Cbriggsae	HK104	MAL211	X	20665796	INDEL	13	predicted		G	GACAAATACAGCAA	322.17	32	4	0.667	60	G/G	11	11	0	0,0,123
Cbriggsae	HK104	MAL211	X	20916956	INDEL	20	predicted		T	TTTAATTTAATTTGTTTATTG	124.39	31	2	0.333	60	T/T	16	16	33	0,33,495
Cbriggsae	HK104	MAL211	X	21244391	SNP	0	predicted		T	G	142.87	22	2	0.333	60	T/T	10	10	5	0,5,228
Cbriggsae	HK104	MAL211	X	21314747	SNP	0	predicted		G	T	336.14	57	2	0.333	60	G/G	15	15	39	0,39,585
Celegans	N2	MAL516	I	110170	SNP	0	validated	I-1_1	A	C	630.42	45	2	0.5	60	A/A	26	26	72	0,72,628
Celegans	N2	MAL516	I	632763	SNP	0	predicted		A	T	280.42	39	2	0.5	51.54	A/A	25	25	63	0,63,945
Celegans	N2	MAL516	I	7120811	SNP	0	validated	I-1_2	G	T	413.42	32	2	0.5	60	G/G	16	16	42	0,42,460
Celegans	N2	MAL516	I	7373156	SNP	0	predicted		C	A	827.42	55	2	0.5	60	C/C	24	24	60	0,60,873
Celegans	N2	MAL516	I	8469835	SNP	0	predicted		C	T	630.42	45	2	0.5	60	C/C	22	22	60	0,60,900
Celegans	N2	MAL516	I	8555549	SNP	0	validated	I-2_2	T	G	593.17	23	2	0.5	60	T/T	6	6	12	0,12,162
Celegans	N2	MAL516	I	11327046	SNP	0	predicted		C	T	515.42	43	2	0.5	60	C/C	25	25	66	0,66,772
Celegans	N2	MAL516	I	14391429	SNP	0	predicted		C	T	191.6	24	2	0.5	60	C/C	15	15	19	0,19,474
Celegans	N2	MAL516	II	3201170	SNP	0	predicted		G	T	428.42	42	2	0.5	60	G/G	22	22	57	0,57,855
Celegans	N2	MAL516	II	7554777	SNP	0	validated	II-1_2	G	A	769.42	52	2	0.5	60	G/G	21	21	60	0,60,900
Celegans	N2	MAL516	II	8826013	SNP	0	validated	II-2_1	G	C	1117.42	53	2	0.5	60	G/G	22	22	60	0,60,900
Celegans	N2	MAL516	II	13614917	SNP	0	predicted		G	T	501.42	37	2	0.5	60	T/T	0.17	17	51	536,51,0
Celegans	N2	MAL516	II	14977363	SNP	0	predicted		A	G	391.42	24	2	0.5	39.52	A/A	12	12	33	0,33,302
Celegans	N2	MAL516	III	1267008	SNP	0	validated	III-1_3	G	A	707.42	46	2	0.5	57.08	A/A	0.25	25	75	742,75,0
Celegans	N2	MAL516	III	1572443	SNP	0	validated	III-1_2	A	G	536.52	22	2	0.5	60	G/G	0.15	15	45	571,45,0
Celegans	N2	MAL516	III	9032263	SNP	0	validated	III-2_2	G	A	730.52	43	2	0.5	60	A/A	0.27	27	79	765,79,0
Celegans	N2	MAL516	III	11558638	SNP	0	validated	III-2_1	A	C	352.52	20	2	0.5	60	A/A	9	9	21	0,21,315
Celegans	N2	MAL516	IV	9076923	SNP	0	validated	IV-1_2	C	T	365.42	35	2	0.5	60	C/C	21	21	60	0,60,627
Celegans	N2	MAL516	IV	10668348	SNP	0	predicted		G	A	816.42	48	2	0.500	60.00	G/G	22	22	60	0,60,639
Celegans	N2	MAL516	IV	12377028	SNP	0	validated	IV-2_1	T	C	637.42	39	2	0.500	60.00	T/T	21	21	60	0,60,900
Celegans	N2	MAL516	V	857346	INDEL	2	predicted		A	ATC	797.38	34	2	0.500	60.00	A/A	13	13	39	0,39,434
Celegans	N2	MAL516	V	5063359	SNP	0	validated	V-1_1	C	G	495.81000000000006	19	2	0.500	60.00	C/C	4	4	9	0,9,127
Celegans	N2	MAL516	V	6048571	SNP	0	predicted		C	T	761.42	38	2	0.500	60.00	C/C	14	14	39	0,39,409
Celegans	N2	MAL516	V	6214649	SNP	0	predicted		G	A	886.42	50	2	0.500	60.00	G/G	22	22	60	0,60,802
Celegans	N2	MAL516	V	13964798	SNP	0	predicted		T	G	703.42	41	2	0.500	60.00	T/T	19	19	51	0,51,765
Celegans	N2	MAL516	V	14808093	SNP	0	validated	V-2_1	C	T	736.42	46	2	0.500	60.00	C/C	22	22	60	0,60,900
Celegans	N2	MAL516	V	17088878	SNP	0	predicted		G	C	958.42	48	2	0.500	60.00	G/G	21	21	60	0,60,900
Celegans	N2	MAL516	V	19448856	SNP	0	predicted		A	T	674.52	29	2	0.500	60.00	A/A	7	7	21	0,21,215
Celegans	N2	MAL516	X	2223602	SNP	0	predicted		T	A	646.47	32	2	0.500	60.00	T/T	9	9	24	0,24,360
Celegans	N2	MAL516	X	2400224	SNP	0	predicted		G	C	548.43	27	2	0.500	60.00	G/G	11	11	30	0,30,319
Celegans	N2	MAL516	X	2928210	SNP	0	predicted		A	T	337.45	20	2	0.500	60.00	A/A	9	9	27	0,27,265
Celegans	N2	MAL516	X	4557182	SNP	0	validated	X-1_1	C	T	517.42	37	2	0.500	60.00	C/C	20	20	60	0,60,684
Celegans	N2	MAL516	X	5712454	SNP	0	predicted		T	G	363.52	20	2	0.500	60.00	T/T	9	9	21	0,21,253
Celegans	N2	MAL516	X	5975163	SNP	0	predicted		T	G	814.42	46	2	0.500	60.00	T/T	23	23	61	0,61,663
Celegans	N2	MAL516	X	8643667	SNP	0	predicted		T	C	572.47	27	2	0.500	60.00	T/T	10	10	24	0,24,275
Celegans	N2	MAL516	X	9617370	SNP	0	predicted		A	G	657.4199999999998	41	2	0.500	60.00	A/A	21	21	57	0,57,855
Celegans	N2	MAL516	X	10118852	SNP	0	predicted		T	A	687.4199999999998	51	2	0.500	60.00	T/T	24	24	63	0,63,852
Celegans	N2	MAL516	X	10686617	INDEL	1	validated	X-2_1	A	AC	593.44	38	2	0.500	60.54	A/A	18	18	23	0,23,553
Celegans	N2	MAL516	X	14393867	INDEL	-1	predicted		CT	C	631.38	45	2	0.500	60.00	CT/CT	21	21	60	0,60,900
Celegans	N2	MAL516	X	17402621	SNP	0	validated	X-2_2	G	A	773.42	52	2	0.500	60.00	G/G	22	22	60	0,60,732
Celegans	N2	MAL516	X	17521246	SNP	0	predicted		A	G	826.4300000000001	38	2	0.500	60.00	A/A	15	15	30	0,30,367
Celegans	N2	MAL516	X	17657761	SNP	0	predicted		A	C	528.42	35	2	0.500	60.00	A/A	18	18	45	0,45,675
Celegans	PB306	MAL418	I	27950	SNP	0	validated	I-1_1	A	T	473.88	89	2	0.250	60.00	A/A	22	22	60	0,60,828
Celegans	PB306	MAL418	I	1187878	SNP	0	predicted		A	C	437.92	56	2	0.250	47.58	A/A	16	16	31	0,31,455
Celegans	PB306	MAL418	I	2634996	INDEL	4	predicted		C	CCCT,CCCCT	1169.33	33	6.2	0.750,0.250	53.62	CCCT/CCCT	0,6,0	6	21	294,21,0,294,22,294
Celegans	PB306	MAL418	I	2739533	INDEL	4	predicted		T	TCCCC,TCCC	1831.3200000000002	46	6.2	0.750,0.250	60.00	TCCCC/TCCCC	0,14,0	14	44	620,44,0,622,45,624
Celegans	PB306	MAL418	I	6324213	SNP	0	predicted		G	T	596.88	84	2	0.250	60.00	G/G	20	20	60	0,60,613
Celegans	PB306	MAL418	I	9136539	SNP	0	predicted		T	A	347.88	87	2	0.250	60.00	T/T	22	22	60	0,60,709
Celegans	PB306	MAL418	I	10887952	INDEL	-6	validated	I-2_1	AATGTGT	A	482.95000000000005	38	2	0.250	60.00	AATGTGT/AATGTGT	8	8	21	0,21,205
Celegans	PB306	MAL418	II	948030	INDEL	-69	predicted		TATTTTCTGTTCAATTGAGAGTAAAACTTGGGTATTTTGTATTAAAATATATCAATTTAACTAAAGGAAA	T	856.8399999999999	87	2	0.250	59.46	TATTTTCTGTTCAATTGAGAGTAAAACTTGGGTATTTTGTATTAAAATATATCAATTTAACTAAAGGAAA/TATTTTCTGTTCAATTGAGAGTAAAACTTGGGTATTTTGTATTAAAATATATCAATTTAACTAAAGGAAA	16	16	45	0,45,493
Celegans	PB306	MAL418	II	1833035	INDEL	1	predicted		A	AT	887.73	24	6	0.750	38.21	AT/AT	0.5	5	15	225,15,0
Celegans	PB306	MAL418	II	2078856	INDEL	17	predicted		C	CGAAAAAAAAAAAAAAA,CGAAAAAAAAAAAAAAAA,CGAAAAAAAAAAAAAA	1972.45	30	4,2,2	0.500,0.250,0.250	60.00	CGAAAAAAAAAAAAAAA/CGAAAAAAAAAAAAAAA	0,11,0,0	11	47	643,47,0,643,47,643,643,47,643,643
Celegans	PB306	MAL418	II	2296229	INDEL	3	predicted		C	CTAG	4438.25	42	7	0.875	58.67	CTAG/CTAG	0.8	8	99	1900,129,0
Celegans	PB306	MAL418	II	2296259	INDEL	-1	predicted		GC	G	4435.43	57	6	0.750	59.22	G/G	0.14	14	99	1900,129,0
Celegans	PB306	MAL418	II	2296265	INDEL	4	predicted		T	TTTCG	4435.43	57	6	0.750	59.22	TTTCG/TTTCG	0.13	13	99	1900,129,0
Celegans	PB306	MAL418	II	3252808	INDEL	-1	predicted		TG	T	1076.0	32	6	0.750	60.00	T/T	0.8	8	24	361,24,0
Celegans	PB306	MAL418	II	3771956	SNP	0	validated	II-1_2	G	C	698.8800000000001	85	2	0.250	60.00	G/G	23	23	60	0,60,900
Celegans	PB306	MAL418	II	8284226	SNP	0	predicted		C	A	541.91	74	2	0.250	60.00	C/C	17	17	25	0,25,585
Celegans	PB306	MAL418	II	9410187	SNP	0	validated	II-2_1	C	T	649.88	96	2	0.250	60.00	C/C	24	24	60	0,60,854
Celegans	PB306	MAL418	III	969461	INDEL	-7	predicted		TTATGTTC	T	986.79	56	2	0.250	58.15	TTATGTTC/TTATGTTC	17	17	15	0,15,225
Celegans	PB306	MAL418	III	969537	INDEL	3	predicted		T	TCAC	986.39	26	2	0.250	55.74	T/T	5	5	12	0,12,180
Celegans	PB306	MAL418	III	969625	INDEL	2	predicted		C	CTA	985.9299999999998	66	2	0.250	53.54	C/C	27	27	81	0,81,775
Celegans	PB306	MAL418	III	4824486	SNP	0	validated	III-1_1	C	G	951.88	100	2	0.250	60.00	C/C	23	23	60	0,60,657
Celegans	PB306	MAL418	III	9723566	SNP	0	validated	III-2_2	G	A	905.8799999999999	101	2	0.250	60.00	G/G	27	27	60	0,60,745
Celegans	PB306	MAL418	IV	2417073	SNP	0	predicted		G	A	684.88	91	2	0.250	60.00	G/G	23	23	60	0,60,735
Celegans	PB306	MAL418	IV	3336296	INDEL	-1	predicted		AC	A	861.8399999999999	87	2	0.250	60.00	AC/AC	23	23	63	0,63,945
Celegans	PB306	MAL418	IV	3931877	SNP	0	validated	IV-1_1	G	A	389.95	41	2	0.250	60.00	G/G	10	10	25	0,25,258
Celegans	PB306	MAL418	IV	5200355	SNP	0	predicted		G	T	931.88	106	2	0.250	60.00	G/G	28	28	69	0,69,855
Celegans	PB306	MAL418	IV	6481216	SNP	0	predicted		C	G	303.91	69	2	0.250	60.00	C/C	21	21	60	0,60,900
Celegans	PB306	MAL418	IV	6796145	SNP	0	predicted		C	T	537.88	92	2	0.250	60.00	C/C	22	22	60	0,60,755
Celegans	PB306	MAL418	IV	6967218	SNP	0	predicted		G	A	781.88	82	2	0.250	60.00	G/G	22	22	60	0,60,826
Celegans	PB306	MAL418	IV	8053747	SNP	0	predicted		T	A	672.88	90	2	0.250	60.00	T/T	22	22	60	0,60,732
Celegans	PB306	MAL418	IV	9709645	SNP	0	validated	IV-2_1	C	A	702.88	98	2	0.250	60.00	C/C	25	25	60	0,60,721
Celegans	PB306	MAL418	V	3277678	SNP	0	validated	V-1_1	G	A	571.88	70	2	0.250	46.33	G/G	21	21	60	0,60,650
Celegans	PB306	MAL418	V	11310419	SNP	0	validated	V-2_2	G	T	675.8799999999999	84	2	0.250	60.00	G/G	18	18	45	0,45,520
Celegans	PB306	MAL418	X	5446454	SNP	0	validated	X-1_1	C	T	223.01999999999998	63	2	0.250	60.00	C/C	22	22	60	0,60,686
Celegans	PB306	MAL418	X	6994561	SNP	0	predicted		A	T	971.88	115	2	0.250	60.00	A/A	24	24	63	0,63,657
Celegans	PB306	MAL418	X	14544549	SNP	0	predicted		A	G	965.92	86	2	0.250	60.00	A/A	13	13	21	0,21,315
Celegans	PB306	MAL418	X	14632040	SNP	0	predicted		T	A	457.96	44	2	0.250	60.00	T/T	8	8	21	0,21,188
Celegans	PB306	MAL418	X	16861146	SNP	0	validated	X-2_1	C	T	629.88	86	2	0.250	60.00	C/C	21	21	60	0,60,712
Celegans	PB306	MAL450	I	8167808	SNP	0	predicted		T	A	360.88	70	2	0.250	60.00	T/T	17	17	42	0,42,534
Celegans	PB306	MAL450	I	8702729	SNP	0	validated	I-2_1	T	C	1196.88	101	2	0.250	60.00	T/T	21	21	60	0,60,553	yes	cdk-8	V40A
Celegans	PB306	MAL450	II	1789601	INDEL	5	predicted		A	ATGCGG	3143.84	84	6	0.750	52.40	ATGCGG/ATGCGG	0.18	18	69	1033,69,0
Celegans	PB306	MAL450	II	2078856	INDEL	17	predicted		C	CGAAAAAAAAAAAAAAA,CGAAAAAAAAAAAAAAAA,CGAAAAAAAAAAAAAA	1972.45	30	4,2,2	0.500,0.250,0.250	60.00	CGAAAAAAAAAAAAAAA/CGAAAAAAAAAAAAAAA	0,11,0,0	11	47	643,47,0,643,47,643,643,47,643,643
Celegans	PB306	MAL450	II	3331503	INDEL	-1	predicted		TA	T	3233.06	46	6	0.750	51.42	T/T	0.9	9	87	1274,87,0
Celegans	PB306	MAL450	II	3331513	SNP	0	predicted		T	A	3241.88	56	6	0.750	54.43	A/A	0.11	11	87	1274,87,0
Celegans	PB306	MAL450	II	5996649	SNP	0	predicted		A	T	571.88	91	2	0.250	60.00	A/A	20	20	43	0,43,450
Celegans	PB306	MAL450	II	7880040	SNP	0	predicted		A	G	1029.88	102	2	0.250	60.00	A/A	27	27	68	0,68,862
Celegans	PB306	MAL450	II	11490799	SNP	0	validated	II-2_1	C	T	530.88	88	2	0.250	60.00	C/C	22	22	60	0,60,900
Celegans	PB306	MAL450	III	4176111	SNP	0	validated	III-1_1	T	C	884.88	98	2	0.250	60.00	T/T	23	23	60	0,60,855
Celegans	PB306	MAL450	III	4839269	SNP	0	predicted		G	A	189.2	28	2	0.250	60.00	G/G	7	7	21	0,21,224
Celegans	PB306	MAL450	III	6972389	SNP	0	predicted		T	G	905.8799999999999	95	2	0.250	60.00	T/T	22	22	60	0,60,686
Celegans	PB306	MAL450	III	11051821	SNP	0	validated	III-2_1	C	T	809.88	98	2	0.250	60.00	C/C	23	23	60	0,60,900
Celegans	PB306	MAL450	IV	448629	SNP	0	predicted		T	G	828.8800000000001	82	2	0.250	60.00	T/T	20	20	60	0,60,603
Celegans	PB306	MAL450	IV	1991053	SNP	0	predicted		G	T	369.9599999999999	40	2	0.250	60.00	G/G	10	10	30	0,30,272
Celegans	PB306	MAL450	IV	3626736	SNP	0	predicted		T	A	603.94	53	2	0.250	60.00	T/T	12	12	30	0,30,329
Celegans	PB306	MAL450	IV	6946911	SNP	0	validated	IV-1_1	C	G	788.8800000000001	90	2	0.250	60.00	C/C	24	24	60	0,60,900
Celegans	PB306	MAL450	IV	9594931	SNP	0	predicted		G	A	173.92	27	2	0.250	60.00	G/G	5	5	9	0,9,135
Celegans	PB306	MAL450	IV	10545314	SNP	0	predicted		G	A	745.8799999999999	90	2	0.250	60.00	G/G	22	22	60	0,60,900
Celegans	PB306	MAL450	IV	12625239	SNP	0	predicted		A	C	635.92	54	2	0.250	60.00	A/A	8	8	21	0,21,315
Celegans	PB306	MAL450	IV	13058123	SNP	0	predicted		C	T	470.91	61	2	0.250	60.00	C/C	22	22	60	0,60,900
Celegans	PB306	MAL450	IV	13554508	INDEL	-1	validated	IV-2_1	CA	C	605.9	66	2	0.250	60.47	CA/CA	23	23	60	0,60,620
Celegans	PB306	MAL450	IV	15914692	SNP	0	predicted		C	A	740.89	84	2	0.250	60.00	C/C	23	23	60	0,60,644
Celegans	PB306	MAL450	V	2028980	SNP	0	validated	V-1_1	T	G	659.94	52	2	0.250	60.00	T/T	12	12	30	0,30,318
Celegans	PB306	MAL450	V	8259099	SNP	0	predicted		C	T	673.9	85	2	0.250	60.00	C/C	23	23	60	0,60,659
Celegans	PB306	MAL450	V	11871371	SNP	0	predicted		A	T	744.88	96	2	0.250	60.00	A/A	22	22	60	0,60,610
Celegans	PB306	MAL450	V	15790839	SNP	0	validated	V-2_2	C	T	690.8799999999999	83	2	0.250	58.25	C/C	19	19	54	0,54,593
Celegans	PB306	MAL450	V	15935013	INDEL	-3	predicted		ATAC	A	3359.59	20	6	0.750	45.20	A/A	0.5	5	87	1247,87,0
Celegans	PB306	MAL450	X	1521358	SNP	0	predicted		T	G	628.89	78	2	0.250	60.00	T/T	27	27	68	0,68,790
Celegans	PB306	MAL450	X	4554851	SNP	0	predicted		C	T	683.8800000000001	88	2	0.250	60.00	C/C	23	23	60	0,60,815
Celegans	PB306	MAL450	X	4589579	SNP	0	validated	X-1_1	C	T	2046.8900000000003	82	6	0.750	60.00	T/T	0.25	25	75	777,75,0
Celegans	PB306	MAL450	X	6988370	SNP	0	predicted		C	T	819.9	72	2	0.250	60.00	C/C	14	14	33	0,33,377
Celegans	PB306	MAL450	X	7536774	SNP	0	predicted		C	A	358.89	63	2	0.250	60.00	C/C	20	20	60	0,60,680
Celegans	PB306	MAL450	X	8609339	SNP	0	predicted		G	A	366.96	79	4	0.500	60.00	G/G	25	25	0	0,0,623
Celegans	PB306	MAL450	X	11154570	SNP	0	predicted		G	A	469.88	92	2	0.250	60.00	G/G	23	23	60	0,60,755
Celegans	PB306	MAL450	X	11732798	SNP	0	predicted		C	A	814.95	90	4	0.500	60.00	C/C	23	23	0	0,0,412
Celegans	PB306	MAL450	X	13358034	SNP	0	validated	X-2_1	C	A	701.88	93	2	0.250	60.00	C/C	25	25	60	0,60,673
Celegans	PB306	MAL450	X	14693495	SNP	0	predicted		A	G	912.9200000000001	84	2	0.250	60.00	A/A	26	26	62	0,62,724
Celegans	PB306	MAL450	X	16244315	SNP	0	predicted		C	G	204.18	39	2	0.250	60.00	C/C	9	9	22	0,22,247
Celegans	PB306	MAL488	I	926656	SNP	0	predicted		G	T	302.0	34	2	0.250	60.00	G/G	7	7	21	0,21,222
Celegans	PB306	MAL488	I	3461983	SNP	0	validated	I-1_1	A	C	306.02	33	2	0.250	60.00	A/A	7	7	21	0,21,187
Celegans	PB306	MAL488	I	3794568	SNP	0	predicted		G	T	319.99	43	2	0.250	59.48	G/G	7	7	21	0,21,210
Celegans	PB306	MAL488	I	4158099	SNP	0	predicted		C	T	900.9000000000001	88	2	0.250	60.00	C/C	23	23	60	0,60,900
Celegans	PB306	MAL488	I	4966510	SNP	0	predicted		G	T	898.92	67	2	0.250	60.00	G/G	24	24	60	0,60,810
Celegans	PB306	MAL488	I	4966511	SNP	0	predicted		A	C	898.92	67	2	0.250	60.00	A/A	24	24	60	0,60,810
Celegans	PB306	MAL488	I	5118767	SNP	0	predicted		C	T	590.91	69	2	0.250	60.00	C/C	15	15	28	0,28,467
Celegans	PB306	MAL488	I	5887943	SNP	0	predicted		C	A	857.88	95	2	0.250	60.00	C/C	25	25	60	0,60,671
Celegans	PB306	MAL488	I	10014597	SNP	0	predicted		T	C	632.88	82	2	0.250	60.00	T/T	20	20	60	0,60,571
Celegans	PB306	MAL488	I	12355976	SNP	0	validated	I-2_1	C	T	694.88	98	2	0.250	60.00	C/C	27	27	67	0,67,711
Celegans	PB306	MAL488	II	561655	SNP	0	predicted		A	T	813.8800000000001	91	2	0.250	60.00	A/A	21	21	60	0,60,713
Celegans	PB306	MAL488	II	2298027	INDEL	3	predicted		C	CAGT	1130.99	35	6	0.750	60.00	CAGT/CAGT	0.7	7	24	350,24,0
Celegans	PB306	MAL488	II	5082203	SNP	0	predicted		C	T	389.90999999999997	62	2	0.250	60.54	C/C	14	14	22	0,22,455
Celegans	PB306	MAL488	II	5544332	SNP	0	validated	II-1_1	C	G	786.88	90	2	0.250	60.43	C/C	24	24	66	0,66,737
Celegans	PB306	MAL488	II	5690890	SNP	0	predicted		C	A	674.88	88	2	0.250	60.00	C/C	21	21	60	0,60,564
Celegans	PB306	MAL488	II	6812647	SNP	0	predicted		G	A	548.88	88	2	0.250	60.00	G/G	26	26	60	0,60,817
Celegans	PB306	MAL488	III	1266614	SNP	0	NA	III-1_2	T	G	407.33	21	2	0.250	40.00	T/T	5	5	15	0,15,123
Celegans	PB306	MAL488	III	1361817	INDEL	-1	NA	III-1_1	AC	A	445.86	53	2	0.25	58.79	AC/AC	15	15	45	0,45,431
Celegans	PB306	MAL488	III	8981310	INDEL	-4	predicted		GATGA	G	988.84	88	2	0.25	60	GATGA/GATGA	21	21	60	0,60,648
Celegans	PB306	MAL488	III	10004793	SNP	0	validated	III-2_1	T	C	783.95	61	2	0.25	60	T/T	8	8	21	0,21,294
Celegans	PB306	MAL488	IV	752017	SNP	0	predicted		G	T	496.91	70	2	0.25	60	G/G	21	21	60	0,60,598
Celegans	PB306	MAL488	IV	1774640	SNP	0	validated	IV-1_1	C	T	379.99	40	2	0.25	60	C/C	8	8	21	0,21,227
Celegans	PB306	MAL488	IV	6054483	SNP	0	predicted		C	T	654.88	90	2	0.25	60	C/C	23	23	60	0,60,900
Celegans	PB306	MAL488	IV	7085724	SNP	0	predicted		G	A	694.92	86	2	0.25	60	G/G	9	9	21	0,21,315
Celegans	PB306	MAL488	IV	15029001	INDEL	-2	validated	IV-2_1	TCA	T	1037.84	88	2	0.25	60.4	TCA/TCA	21	21	60	0,60,718
Celegans	PB306	MAL488	V	447884	INDEL	-7	predicted		GTATAATA	G	348.31	31	1	0.125	50.99	GTATAATA/GTATAATA	11	11	33	0,33,373
Celegans	PB306	MAL488	V	447893	INDEL	-10	predicted		CAAGATATAGA	C	348.31	35	1	0.125	46.9	CAAGATATAGA/CAAGATATAGA	11	11	33	0,33,371
Celegans	PB306	MAL488	V	526174	INDEL	1	predicted		C	CT	1518.84	91	2	0.25	57	C/C	22	22	45	0,45,675
Celegans	PB306	MAL488	V	526179	INDEL	-2	predicted		TCG	T	1518.84	93	2	0.25	57	TCG/TCG	22	22	45	0,45,675
Celegans	PB306	MAL488	V	4118082	SNP	0	validated	V-1_1	G	A	847.88	82	2	0.25	60	G/G	18	18	45	0,45,488
Celegans	PB306	MAL488	V	4327527	SNP	0	predicted		G	A	459.88	87	2	0.25	60	G/G	22	22	60	0,60,519
Celegans	PB306	MAL488	V	5233004	INDEL	-8	predicted		TGCCAATAA	T	1119.84	72	2	0.25	60	TGCCAATAA/TGCCAATAA	22	22	63	0,63,728
Celegans	PB306	MAL488	V	5233017	SNP	0	predicted		G	T	1128.88	68	2	0.25	60	G/G	22	22	63	0,63,728
Celegans	PB306	MAL488	V	5233019	INDEL	-27	predicted		TACCCAGACAACGAATAGTCATCAAACA	T	1119.84	69	2	0.25	60	TACCCAGACAACGAATAGTCATCAAACA/TACCCAGACAACGAATAGTCATCAAACA	22	22	63	0,63,728
Celegans	PB306	MAL488	V	5233048	INDEL	-13	predicted		TGAAGAGAAGCCGA	T	1119.84	73	2	0.25	60	TGAAGAGAAGCCGA/TGAAGAGAAGCCGA	22	22	63	0,63,728
Celegans	PB306	MAL488	V	5233065	INDEL	-16	predicted		CAAAACCTCCACCATGA	C	1119.84	77	2	0.25	60	CAAAACCTCCACCATGA/CAAAACCTCCACCATGA	22	22	63	0,63,728
Celegans	PB306	MAL488	V	8394726	SNP	0	predicted		T	A	432.88	93	2	0.25	59.01	T/T	25	25	66	0,66,990
Celegans	PB306	MAL488	V	9516987	SNP	0	predicted		C	A	281.88	81	2	0.25	60	C/C	23	23	60	0,60,660
Celegans	PB306	MAL488	V	10132855	SNP	0	predicted		G	C	887.89	86	2	0.25	60	G/G	26	26	63	0,63,750
Celegans	PB306	MAL488	V	10848460	SNP	0	predicted		C	A	550.88	88	2	0.25	60	C/C	21	21	57	0,57,855
Celegans	PB306	MAL488	V	13496153	SNP	0	validated	V-2_1	G	T	523.89	41	2	0.25	60	G/G	10	10	24	0,24,338
Celegans	PB306	MAL488	V	15905240	INDEL	-10	predicted		CCTCTATAGGA	C	355.98	49	2	0.25	49.77	CCTCTATAGGA/CCTCTATAGGA	15	15	30	0,30,450
Celegans	PB306	MAL488	V	15936841	INDEL	2	predicted		C	CCA	906.31	31	7	0.875	60	CCA/CCA	0.5	5	26	313,26,0
Celegans	PB306	MAL488	V	15936844	INDEL	-2	predicted		CAT	C	906.31	28	7	0.875	60	C/C	0.5	5	26	313,26,0
Celegans	PB306	MAL488	V	16017636	INDEL	-12	predicted		ATCAAAACTGTAC	A	3220.76	41	6	0.75	58.79	A/A	0.1	10	89	1290,89,0
Celegans	PB306	MAL488	V	16017656	INDEL	1	predicted		A	AC	3220.76	48	6	0.75	60	AC/AC	0.13	13	89	1290,89,0
Celegans	PB306	MAL488	V	16017666	SNP	0	NA	V-2_2	A	G	3230.05	58	6	0.75	60	G/G	0.17	17	89	1290,89,0
Celegans	PB306	MAL488	V	16017669	INDEL	3	predicted		T	TTTC	3220.76	60	6	0.75	60	TTTC/TTTC	0.18	18	89	1290,89,0
Celegans	PB306	MAL488	V	18678142	SNP	0	predicted		C	T	347.99	39	2	0.25	60	C/C	11	11	21	0,21,305
Celegans	PB306	MAL488	V	19924327	SNP	0	false_positive	V-2_5	A	T	677.89	72	2	0.25	60	A/A	16	16	48	0,48,416
Celegans	PB306	MAL488	X	3156271	SNP	0	predicted		C	T	338.95	45	2	0.25	60	C/C	13	13	23	0,23,412
Celegans	PB306	MAL488	X	3858459	SNP	0	validated	X-1_2	T	C	780.88	89	2	0.25	60	T/T	23	23	60	0,60,775
Celegans	PB306	MAL488	X	8295607	INDEL	-16	validated	X-1_1	TACAGCAACCTTCCGGA	T	1540.87	85	2	0.25	60	TACAGCAACCTTCCGGA/TACAGCAACCTTCCGGA	22	22	63	0,63,729	yes	R09F10.3	frame shift, 4th exon over 7, shift after aa 267, final mutated protein is 269 aa instead of 468)
Celegans	PB306	MAL488	X	9749015	SNP	0	predicted		T	A	736.88	96	2	0.25	60	T/T	21	21	60	0,60,753
Celegans	PB306	MAL488	X	10565081	SNP	0	predicted		G	A	556.88	87	2	0.25	60	G/G	20	20	48	0,48,720
Celegans	PB306	MAL488	X	14573692	SNP	0	predicted		G	T	819.88	93	2	0.25	60	G/G	22	22	60	0,60,900
Celegans	PB306	MAL488	X	15437120	SNP	0	validated	X-2_1	G	A	245.98	44	2	0.25	60	G/G	11	11	30	0,30,264
Celegans	PB306	MAL488	X	15559243	SNP	0	predicted		C	T	366.92	57	2	0.25	60	C/C	23	23	63	0,63,615
Celegans	PB306	MAL488	X	17007533	SNP	0	predicted		G	A	2109.88	85	6	0.75	60	A/A	0.21	21	63	705,63,0
Celegans	N2	MAL516	III	2189064	SV	-1344	validated														yes	gcn-1	1 exon deleted (21th exon over 28, total protein = 2651 aa)
Celegans	N2	MAL516	V	3870657	SV	-395	predicted
Celegans	PB306	MAL418	III	12161506	SV	-54355	validated														yes	9 coding genes	deletion
Celegans	PB306	MAL450	V	5956834	SV	-614	predicted
