# Supplementary material for: A broad mutational target explains a fast rate of phenotypic evolution
Source: eLife. 2020 Aug 27;9:e54928. doi: 10.7554/eLife.54928 (PMC7556874; doi:10.7554/eLife.54928)
Supplement: Supplementary file 7. — (a) No mutations were found in the vicinity of the five causal mutations in the MA line dataset, and the regions do not contain a particularly high level of mutations/polymorphisms in the MMP and CeNDR datasets. (b) The second sheet provides the list of mutation accumulation lines from Saxena et al., 2019. [file elife-54928-supp7.xlsx]

## Sheet: a. Mutations
Suppl. File 7
					Data: 75 other MA lines		Data: MMP				Data: CeNDR
					distance to closest mutation in (direction)		distance to closest mutation in (direction)		# mutations in 100 bp window*	% of 100-bp windows with more (≥) mutations	distance to closest natural variation in (direction)		# natural variations in 100 bp window*	% of 100-bp windows with more (≥) variations
gene	CHROM	Position of the mutation	TYPE	EVENTLENGTH	5’	3’	5’	3’			5’	3’
sfrp-1	IV	6401893	SNP	0	10459	134571	67	95	0	100	132	16	3	41
cdk-8	I	8702729	SNP	0	4456	24757	65	282	0	100	419	124	0	100
R09F10.3	X	8295611	INDEL	-16	114988	3974	28	12	3	6.7	195	50	0	100
gcn-1	III	2189023	SV – 5’ break point	-1382	45221	79657	824	88	0	100	5	49	3	41
gcn-1	III	2190405	SV – 3’ break point	-1382	46603	78275	590	35	1	55	4	6	3	41
Y75B8A.8	III	12161506	SV – 5’ break point	-54355	114257	58729	68	50	1	55	13	124	1	79
Y75B8A.8	III	12215861	SV – 3’ break point	-54355	168612	4374	115	459	0	100	32	4	6	15
									(all genome median=1)				(all genome median=2)
Note: the position of sfrp-1 mutation has been transposed in C. elegans (the causal mutation found in a C. briggsae MA line)
* the window is centered on the mutation (50 bp before and after)

## Sheet: b. MA line datasets
Line Set	Line ID	Reference Genome used to generate the variant call file	Regions re-sequenced because of low coverage in Saxena et al. data				Results of re-sequencing
			cdk-8	R09F10.3	gcn-1	Y75B8A.8
N2 G0 ancestor	N2
O1MA_ancestors	537	WS234
O1MA_ancestors	566	WS234
O1MA_ancestors	583	WS234
O1MA_ancestors	587	WS234
O1MA_ancestors	504	WS234
O1MA_ancestors	508	WS234
O1MA_ancestors	547	WS234
O1MA_ancestors	550	WS234
O1MA_other	502	WS260
O1MA_other	503	WS260
O1MA_other	509	WS260
O1MA_other	511	WS260			2156175..2156647		same as N2
O1MA_other	514	WS260
O1MA_other	516	WS260
O1MA_other	522	WS260
O1MA_other	525	WS260
O1MA_other	529	WS260
O1MA_other	530	WS260
O1MA_other	548	WS260
O1MA_other	552	WS260
O1MA_other	555	WS260
O1MA_other	556	WS260
O1MA_other	558	WS260
O1MA_other	563	WS260
O1MA_other	572	WS260			2156175..2156647; 2181985..2182508		same as N2
O1MA_other	590	WS260
O1MA_other	592	WS260
O1MA_other	595	WS260
O2MA-400G	504.3	WS234
O2MA-400G	504.1	WS234
O2MA-400G	504.15	WS234			2154071..2155182	12166739..12167944	same as N2
O2MA-400G	504.23	WS234
O2MA-400G	504.3	WS234
O2MA-400G	508.25	WS234
O2MA-400G	508.3	WS234
O2MA-400G	508.34	WS234
O2MA-400G	508.35	WS234
O2MA-400G	508.37	WS234	8703061..8703385		2184077..2184687; 2185432..2186068	12166739..12167944	same as N2
O2MA-400G	522.4	WS234
O2MA-400G	522.12	WS234
O2MA-400G	522.22	WS234
O2MA-400G	522.32	WS234
O2MA-400G	537.13	WS234
O2MA-400G	537.24	WS234
O2MA-400G	537.25	WS234
O2MA-400G	537.44	WS234
O2MA-400G	537.45	WS234
O2MA-400G	547.06	WS234		8294576..8295152			same as N2
O2MA-400G	547.18	WS234
O2MA-400G	547.33	WS234			2167816..2168320; 2193346..2194007		same as N2
O2MA-400G	547.44	WS234
O2MA-400G	550.02	WS234				12166739..12167944	same as N2
O2MA-400G	550.2	WS234
O2MA-400G	550.22	WS234
O2MA-400G	550.36	WS234
O2MA-400G	550.41	WS234
O2MA-400G	566.24	WS234			2154071..2155182; 2164503..2165086; 2188450..2190503; 2192262..2192779	12160831..12161394; 12165030..12165901; 12166739..12167944	same as N2
O2MA-400G	566.28	WS234
O2MA-400G	566.29	WS234
O2MA-400G	566.4	WS234
O2MA-400G	566.45	WS234
O2MA-400G	579.2	WS234
O2MA-400G	579.7	WS234
O2MA-400G	579.18	WS234
O2MA-400G	579.24	WS234
O2MA-400G	579.36	WS234
O2MA-400G	583.13	WS234
O2MA-400G	583.22	WS234
O2MA-400G	583.38	WS234
O2MA-400G	583.41	WS234
O2MA-400G	583.43	WS234
O2MA-400G	587.22	WS234
O2MA-400G	587.26	WS234
O2MA-400G	587.38	WS234
O2MA-400G	587.43	WS234
O2MA-400G	587.48	WS234
