# Supplementary figures and images for: A broad mutational target explains a fast rate of phenotypic evolution
Source: eLife journal article supplement (doi:10.7554/elife.54928), 2020-08-27

a. Mutation accumulation lines

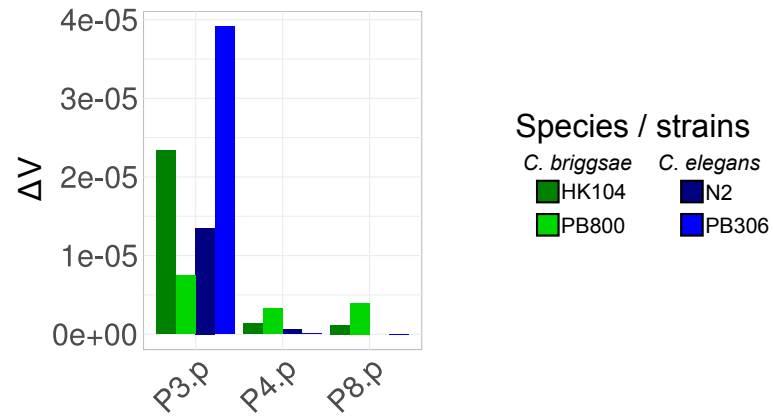

b. Wild isolates

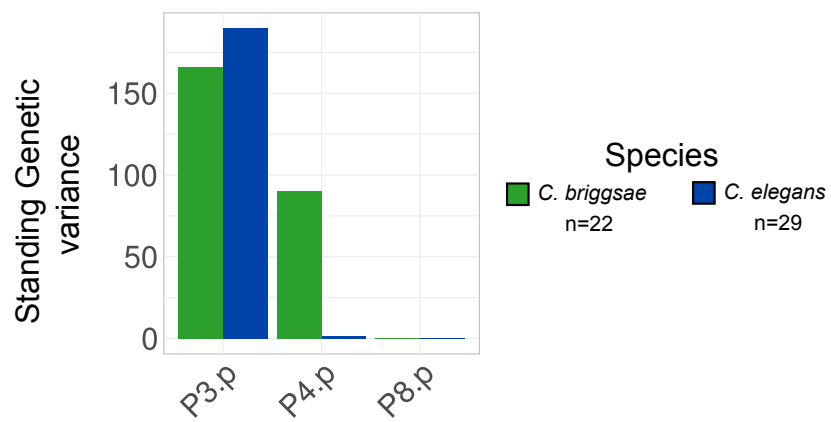

Supplement: supp [file elife_poa_e54928_Figure_1_figure_supplement_1.pdf › elife_poa_e54928_Figure_1_figure_supplement_1.pdf]

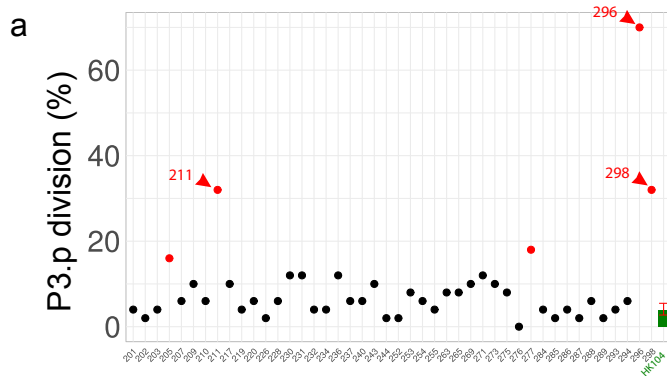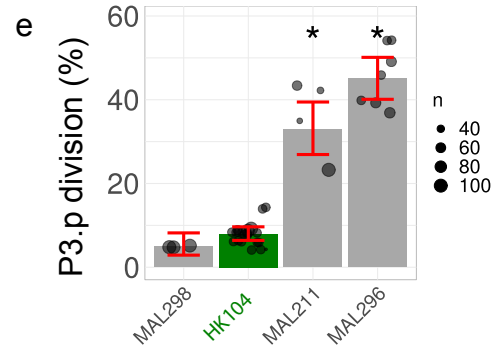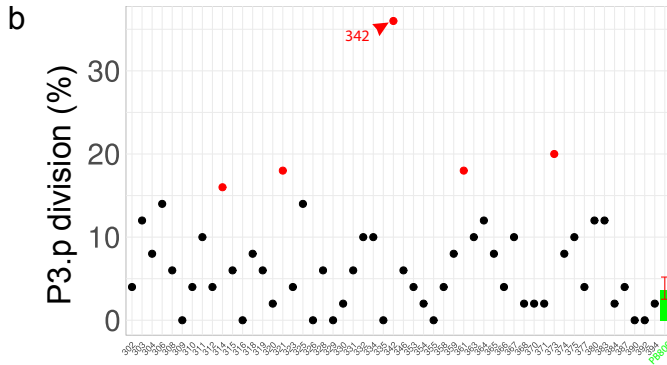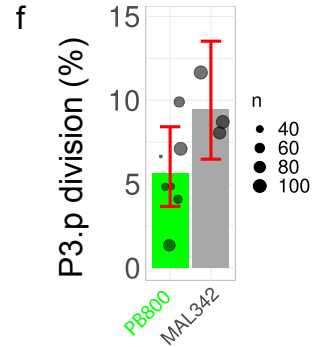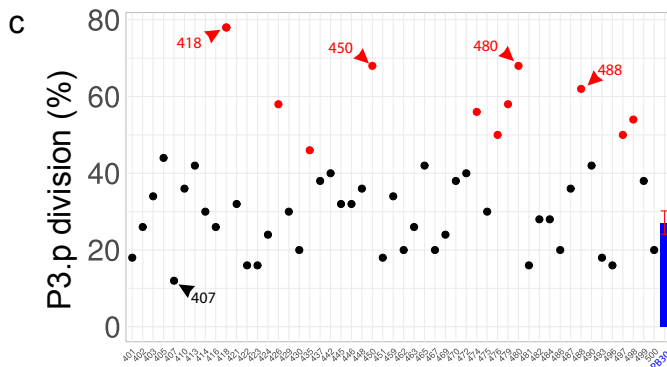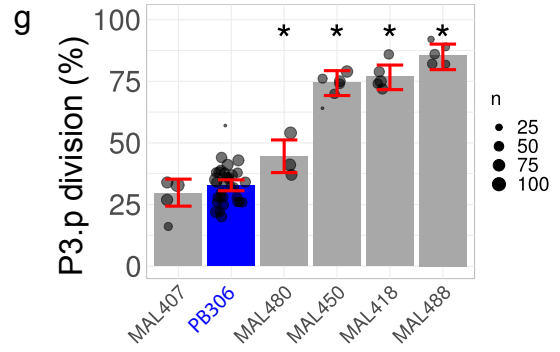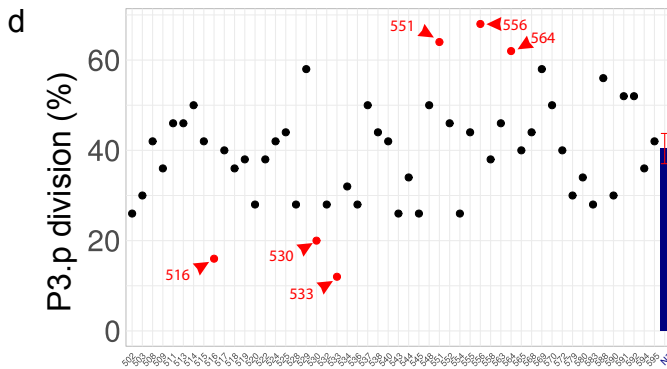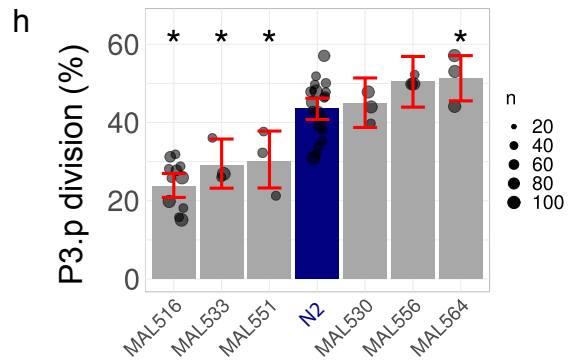

Lines (MA line or ancestor)

Supplement: supp [file elife_poa_e54928_Figure_2_figure_supplement_1.pdf › elife_poa_e54928_Figure_2_figure_supplement_1.pdf]

a *C. briggsae*

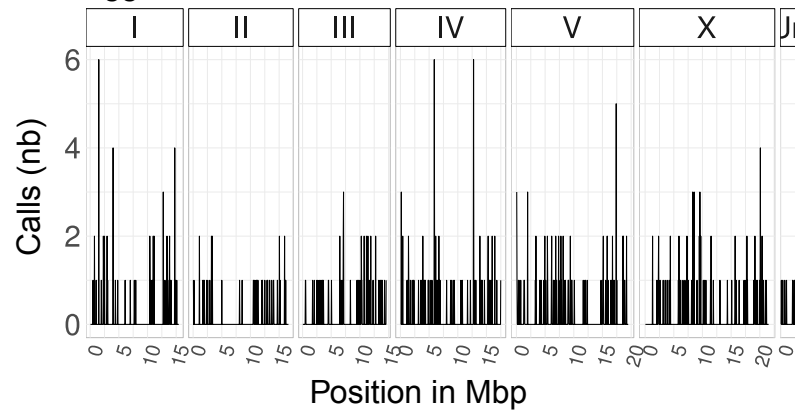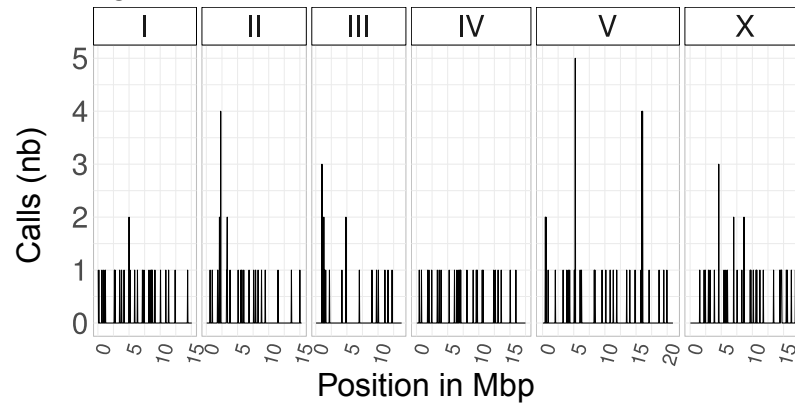

Supplement: supp [file elife_poa_e54928_Figure_3_figure_supplement_2.pdf › elife_poa_e54928_Figure_3_figure_supplement_2.pdf]

# PREDICTION

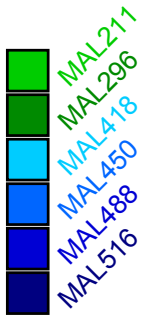

a. SNP

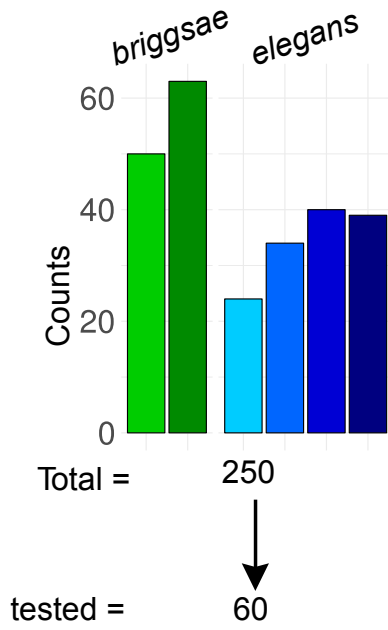

b. Short indels

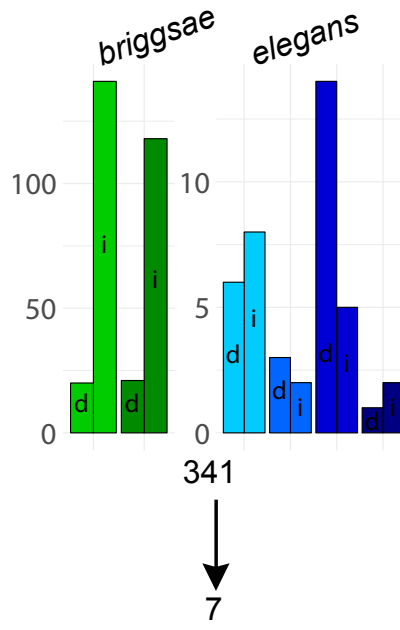

c. Large indels

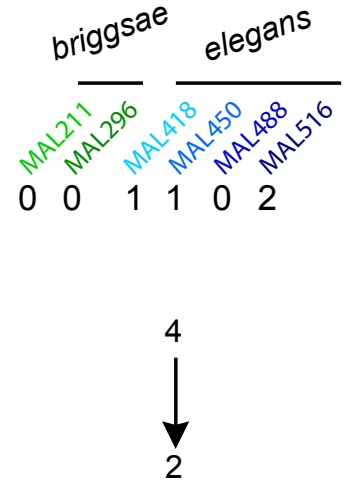

# VALIDATION

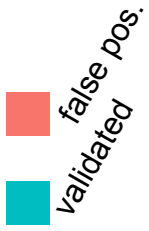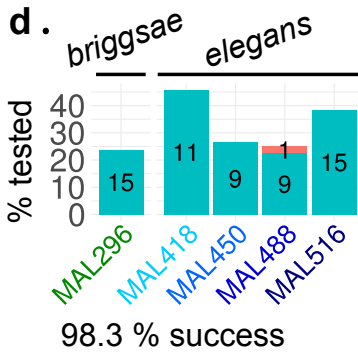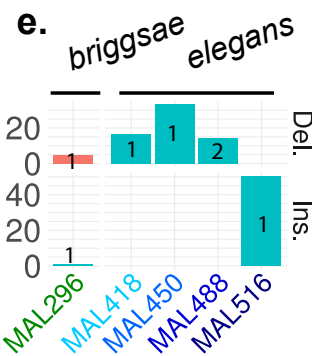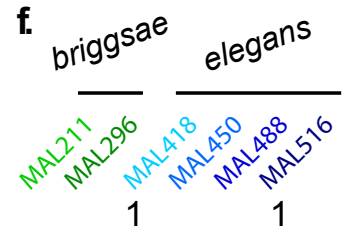

Supplement: supp [file elife_poa_e54928_Figure_3_figure_supplement_3.pdf › elife_poa_e54928_Figure_3_figure_supplement_3.pdf]

MA line: 296  
Ancestral Line: HK104

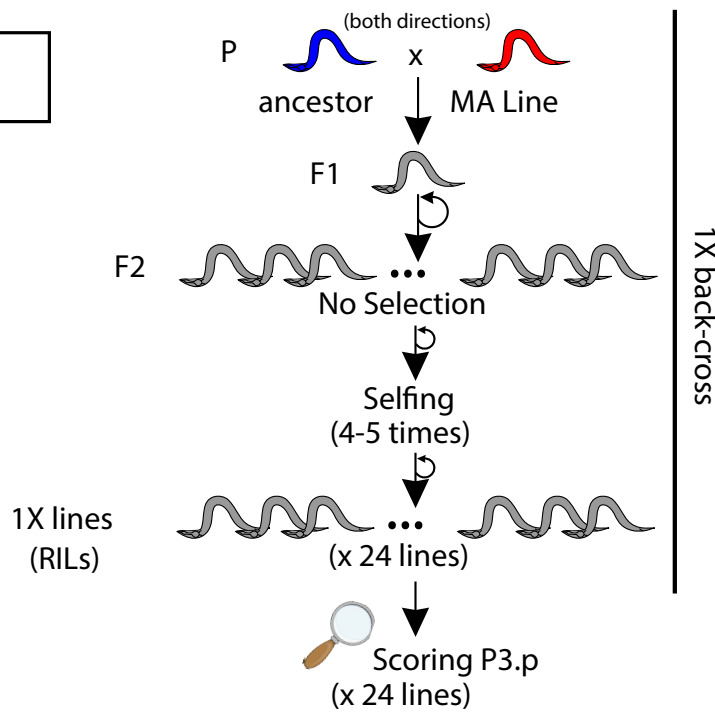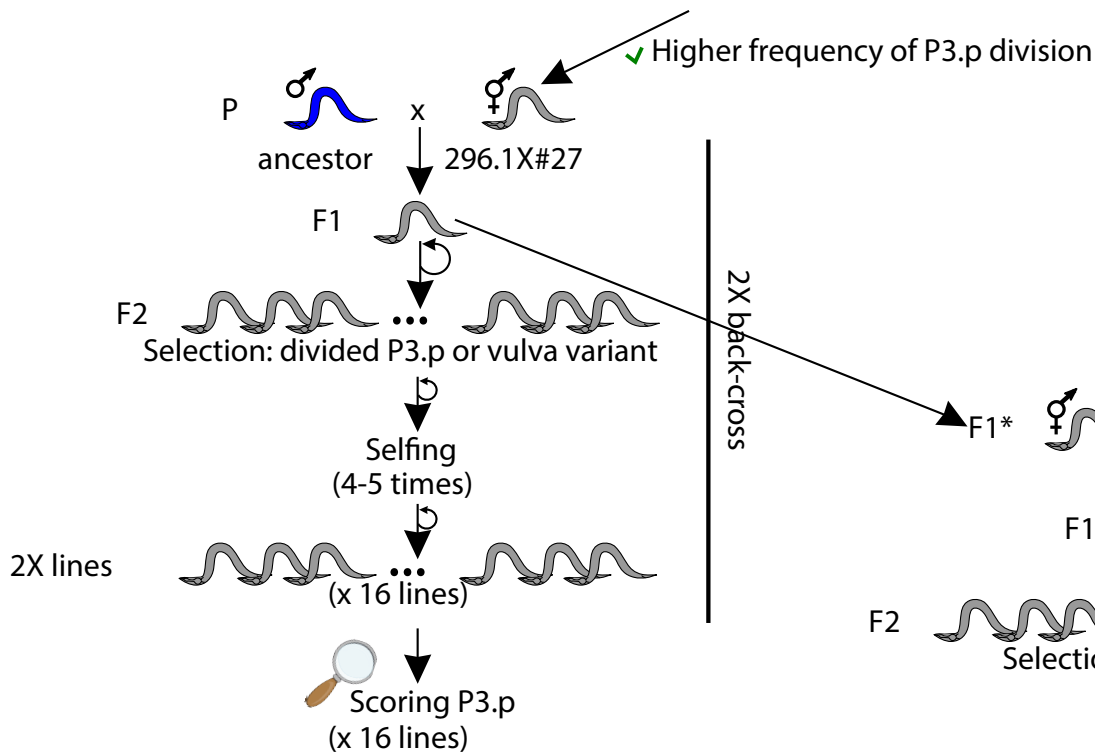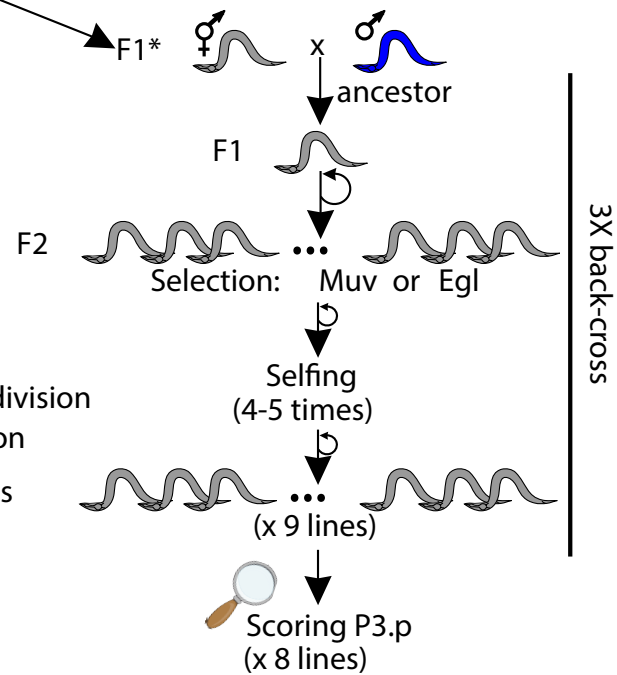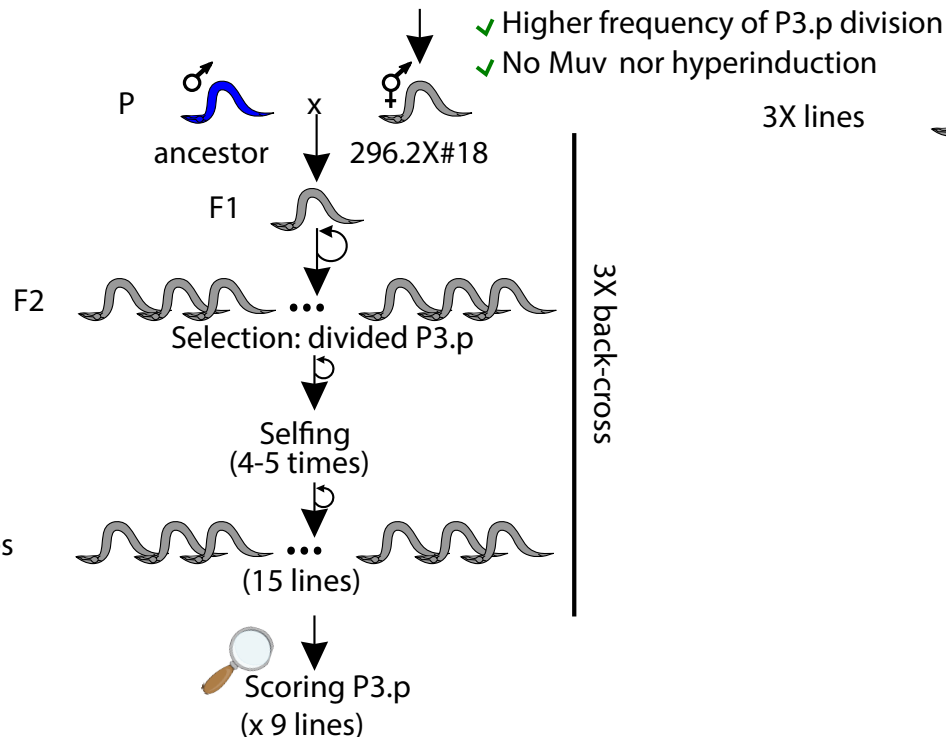

Supplement: supp [file elife_poa_e54928_Figure_3_figure_supplement_4.pdf › elife_poa_e54928_Figure_3_figure_supplement_4.pdf]

MA line: 418  
Ancestral Line: PB306

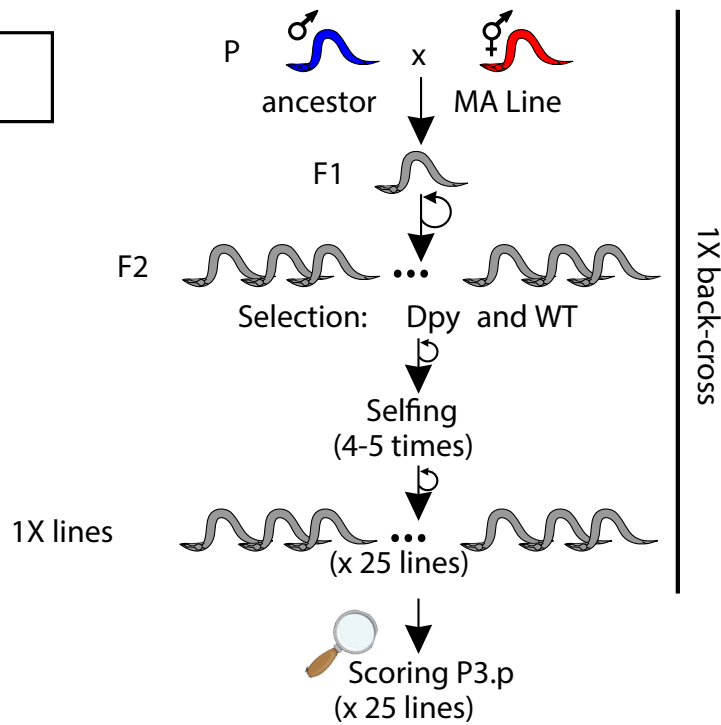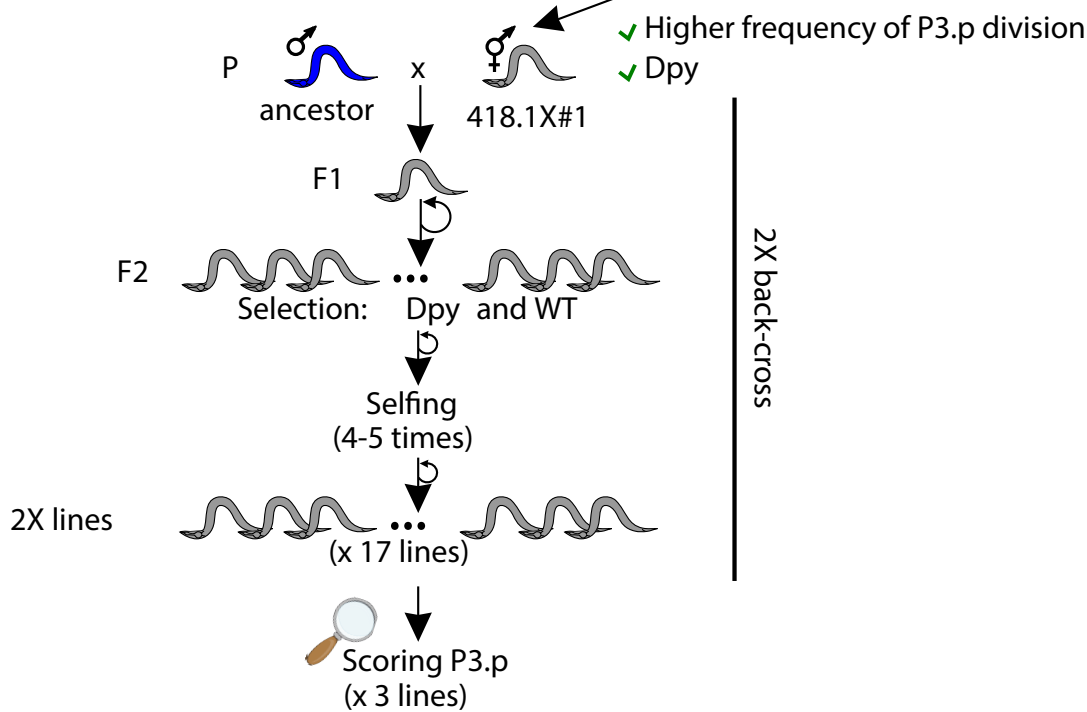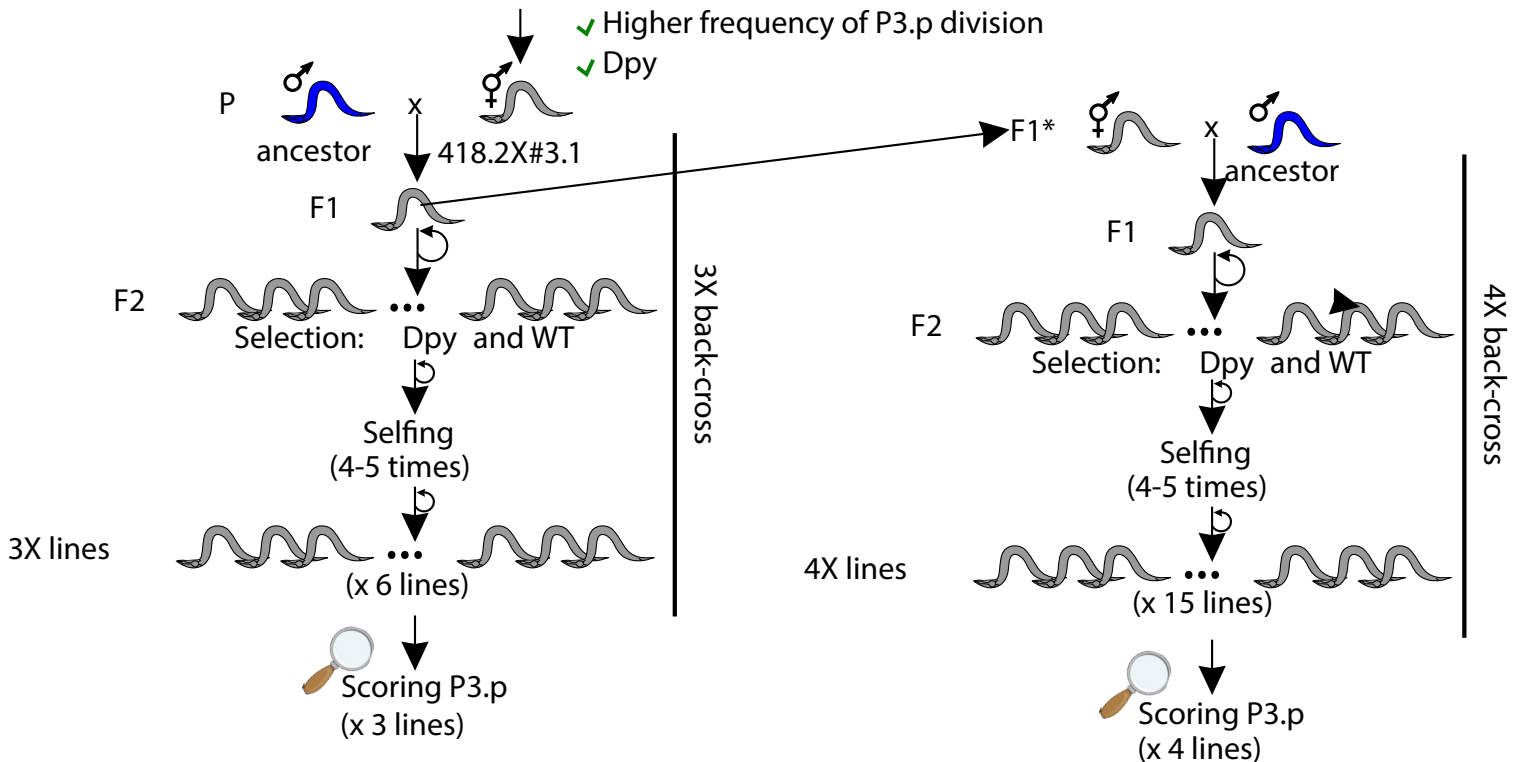

Supplement: supp [file elife_poa_e54928_Figure_3_figure_supplement_5.pdf › elife_poa_e54928_Figure_3_figure_supplement_5.pdf]

MA line: 450  
Ancestral Line: PB306

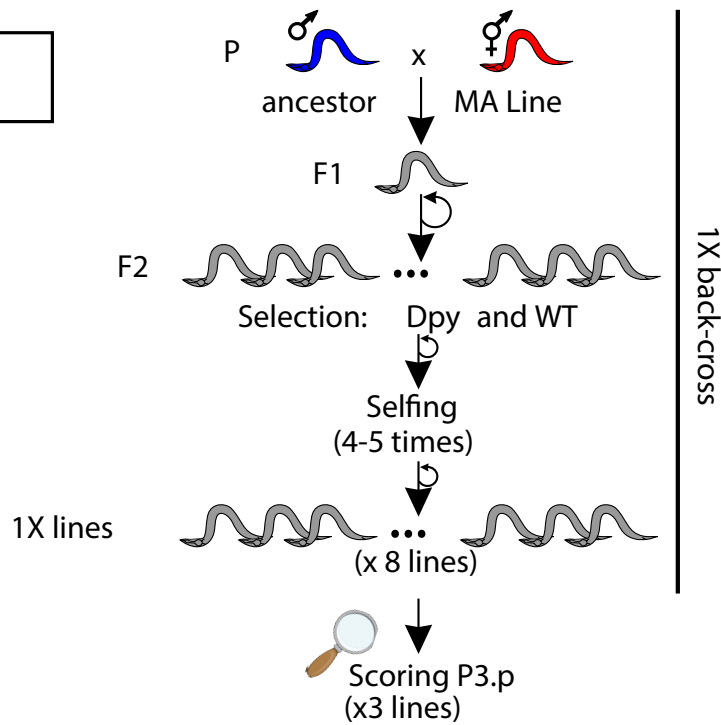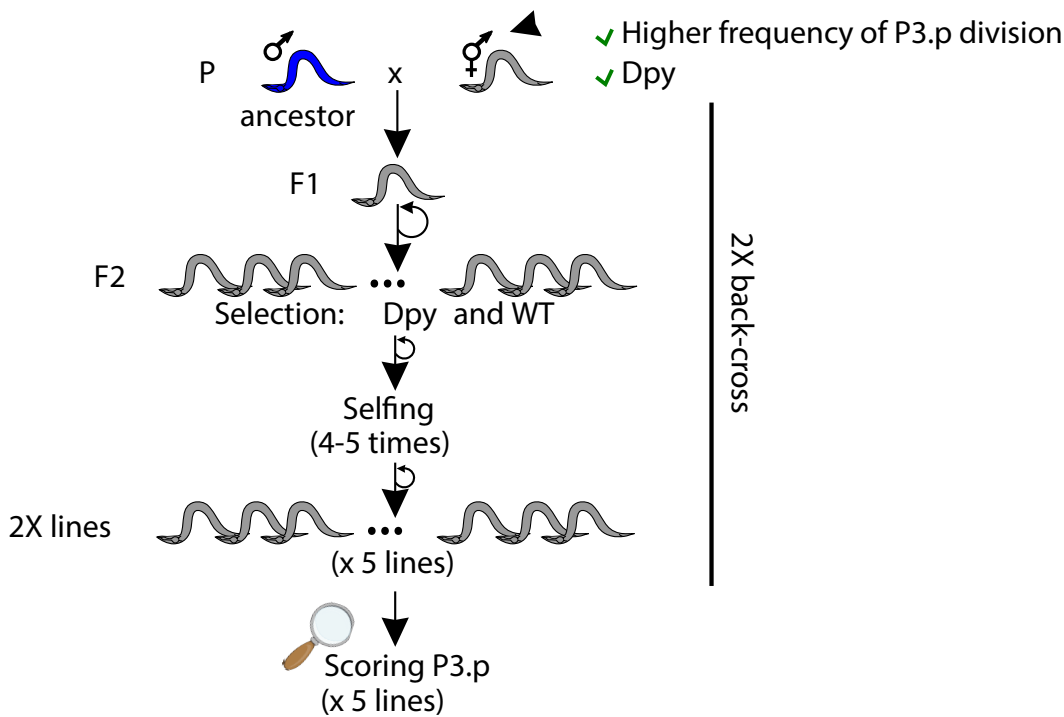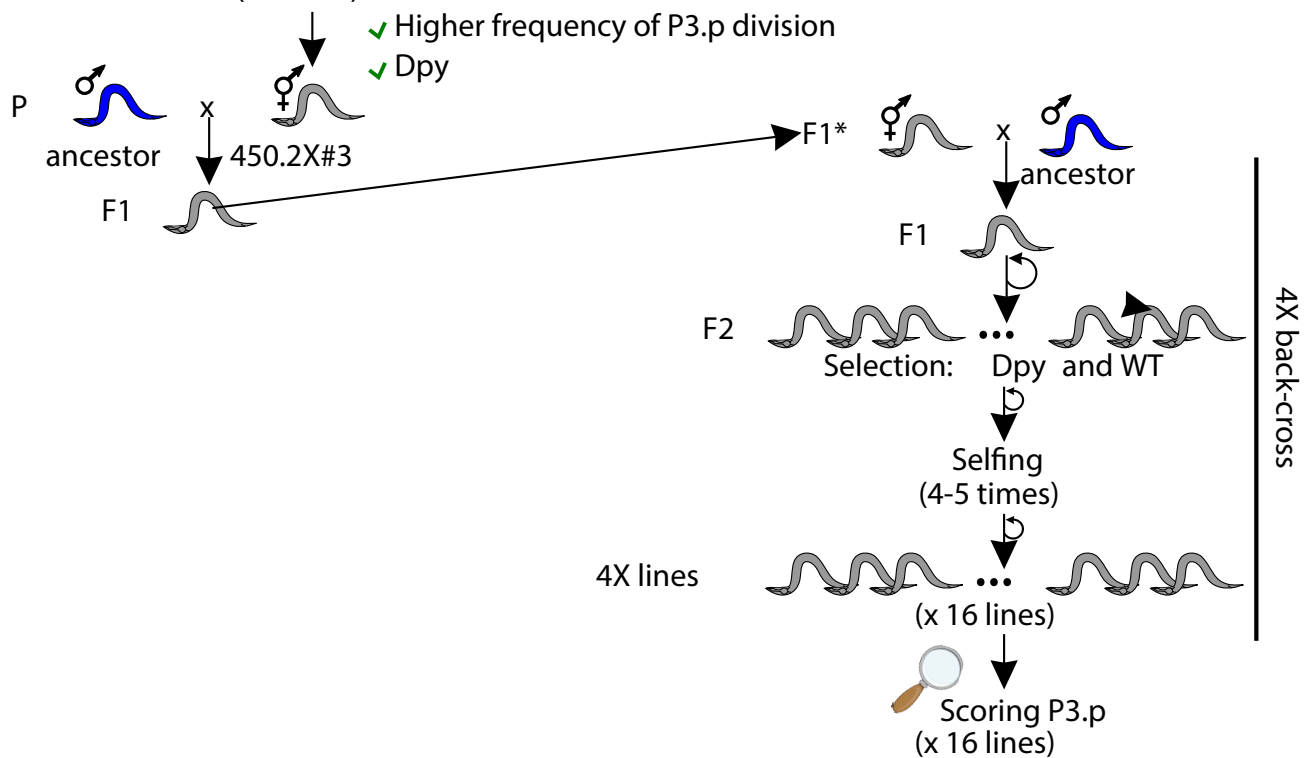

Supplement: supp [file elife_poa_e54928_Figure_3_figure_supplement_6.pdf › elife_poa_e54928_Figure_3_figure_supplement_6.pdf]

MA line: 488  
Ancestral Line: PB306

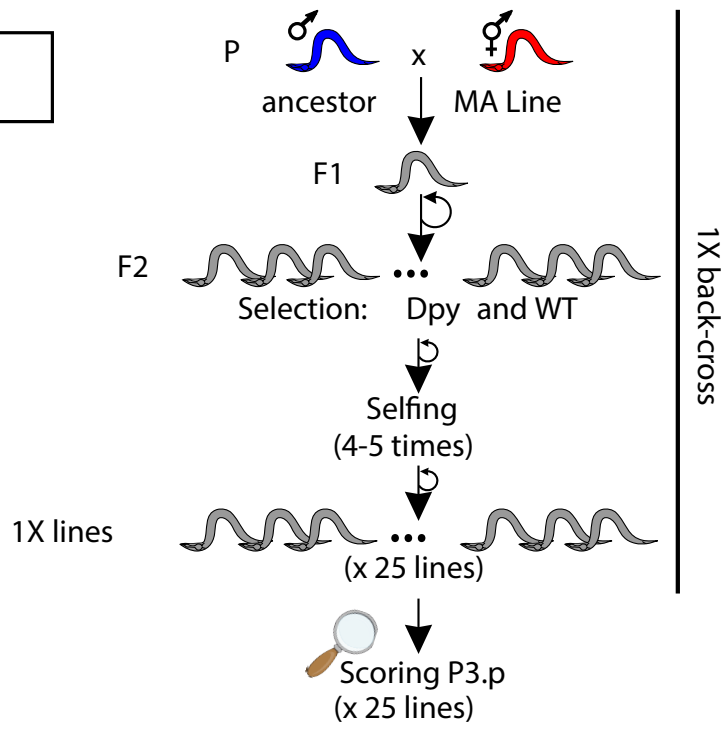

Supplement: supp [file elife_poa_e54928_Figure_3_figure_supplement_7.pdf › elife_poa_e54928_Figure_3_figure_supplement_7.pdf]

MA line: 516  
Ancestral Line: N2

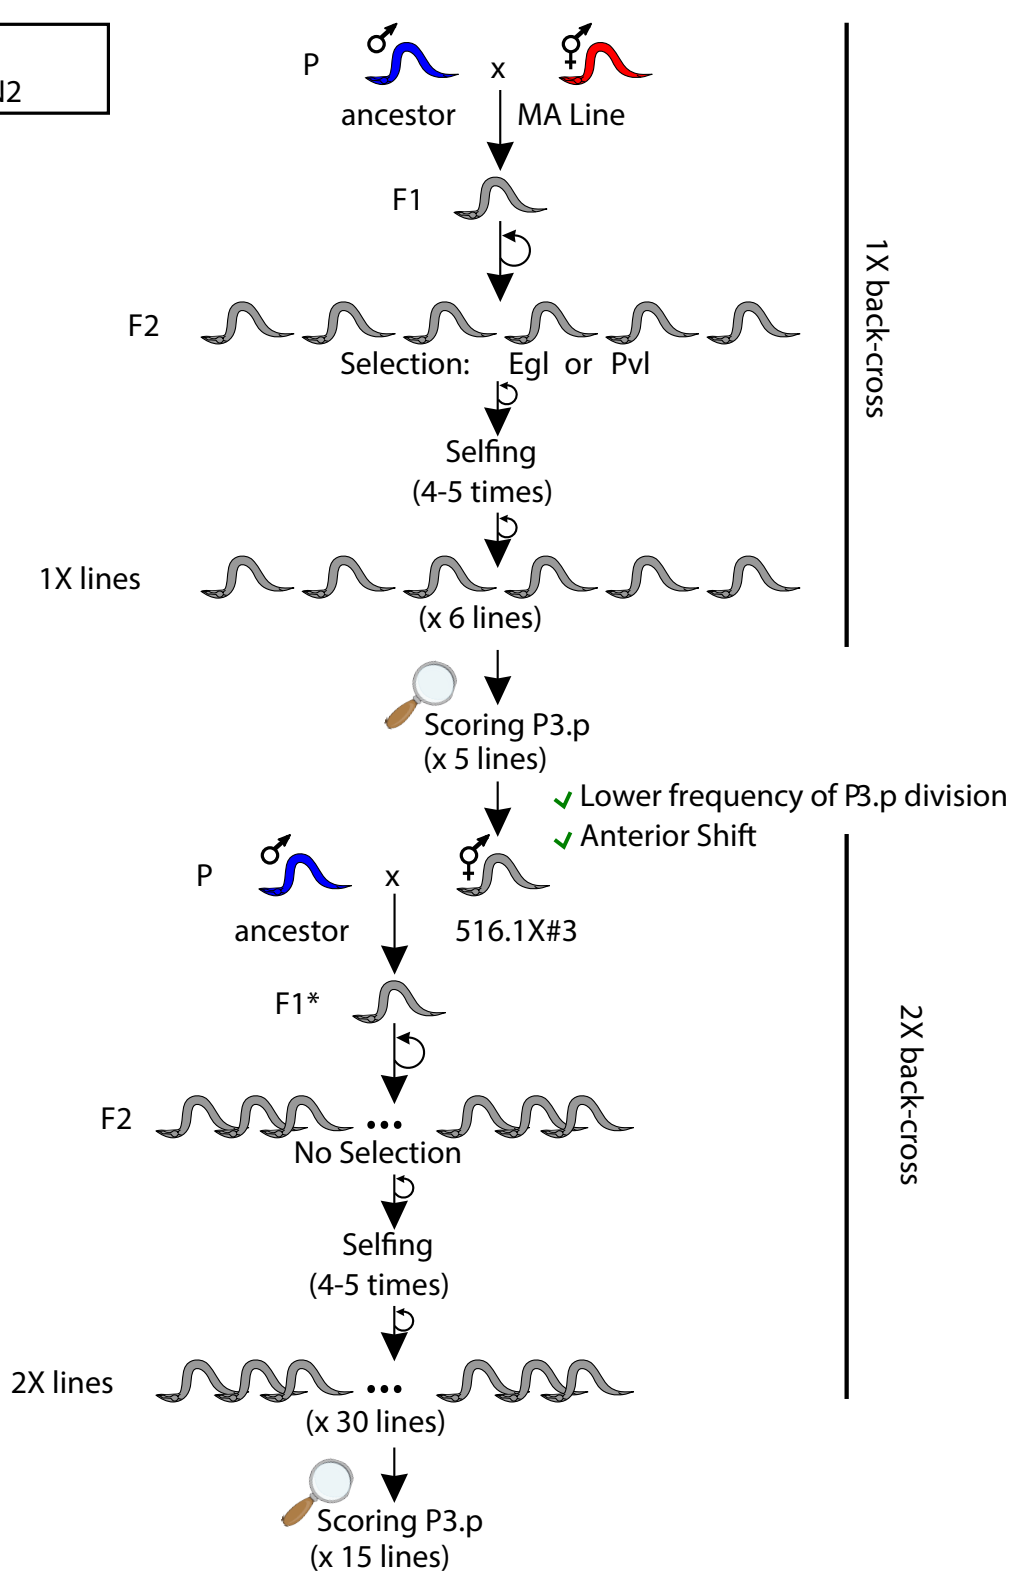

Supplement: supp [file elife_poa_e54928_Figure_3_figure_supplement_8.pdf › elife_poa_e54928_Figure_3_figure_supplement_8.pdf]

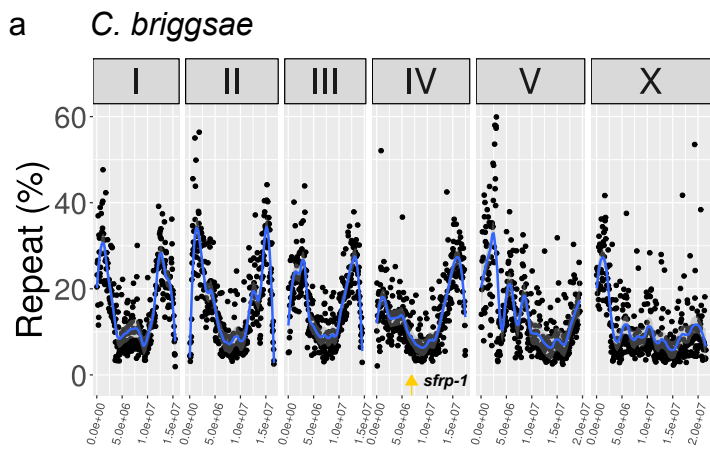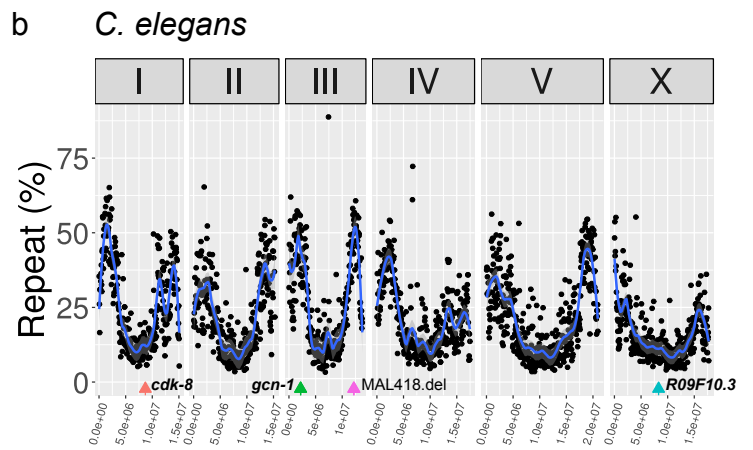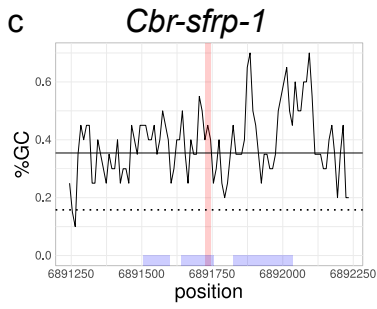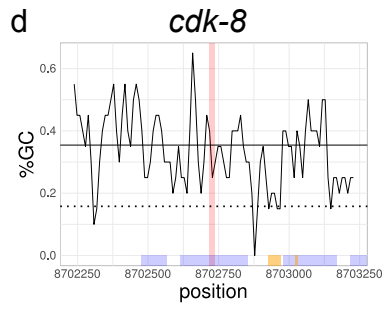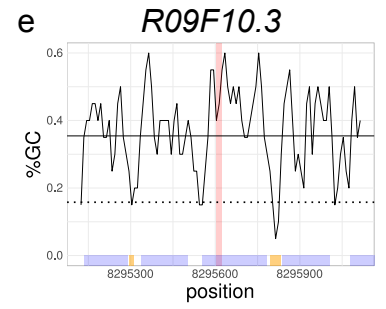

*gcn-1*

MAL418 deletion

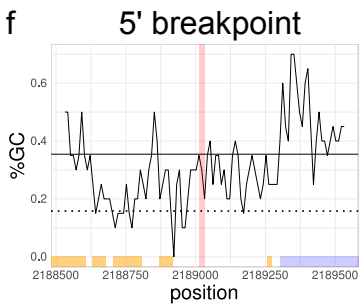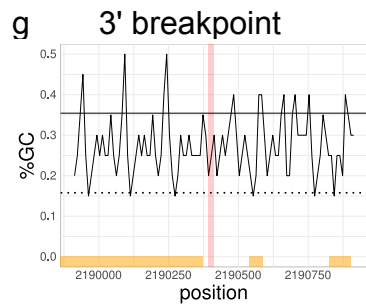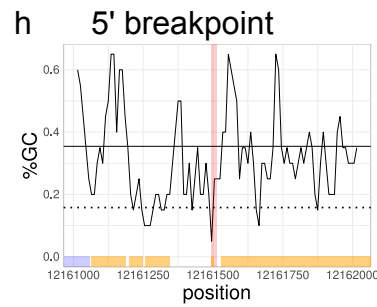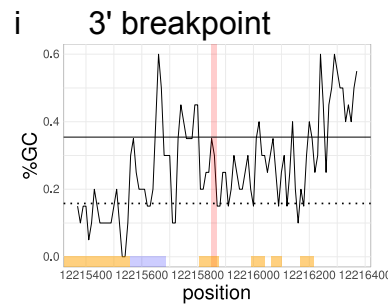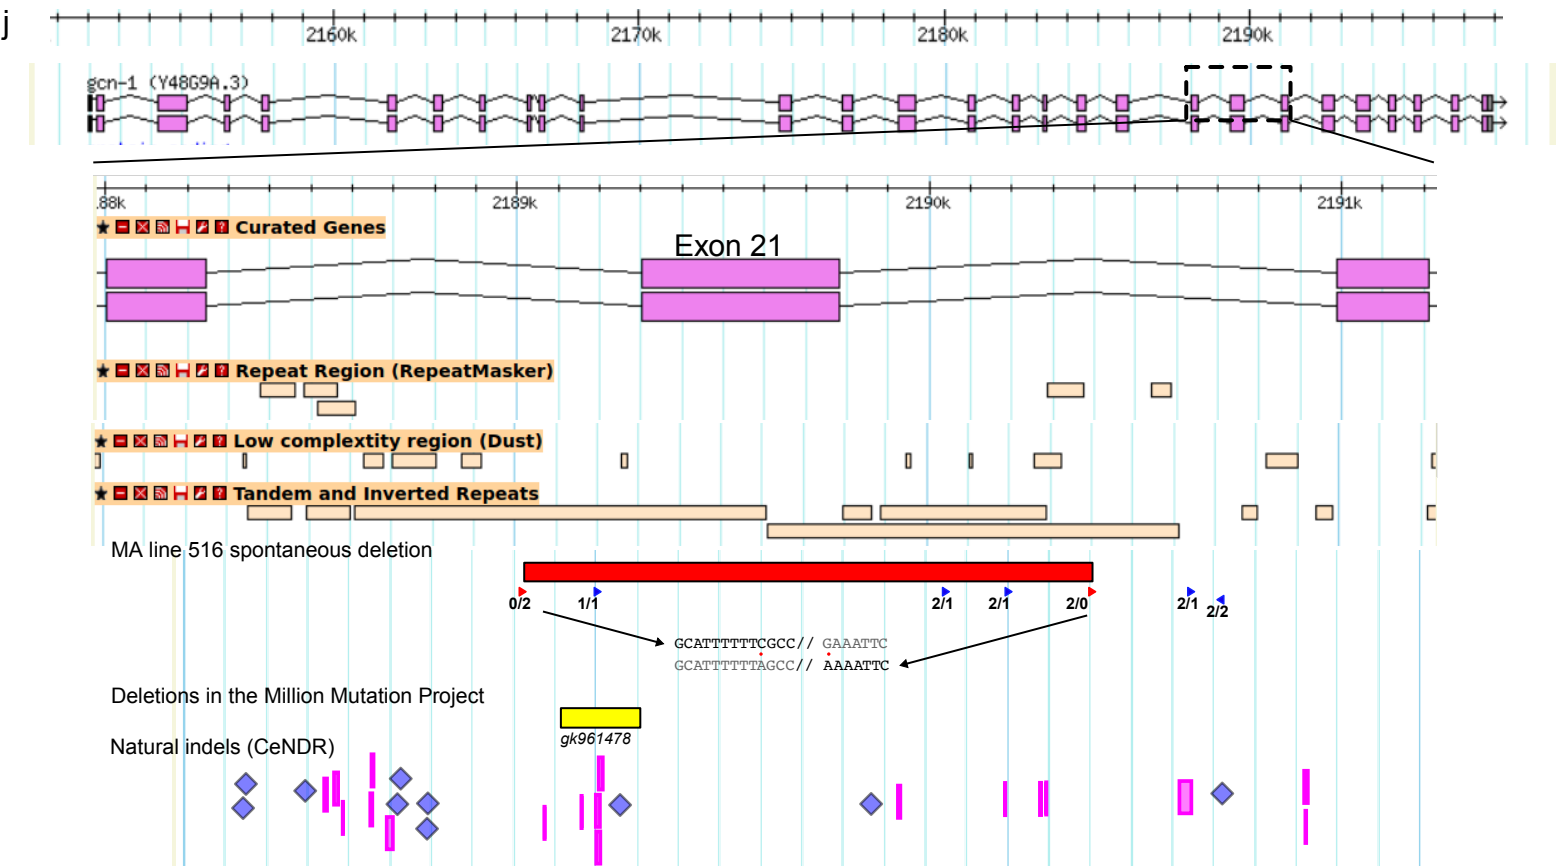

Supplement: supp [file elife_poa_e54928_Figure_5_figure_supplement_1.pdf › elife_poa_e54928_Figure_5_figure_supplement_1.pdf]

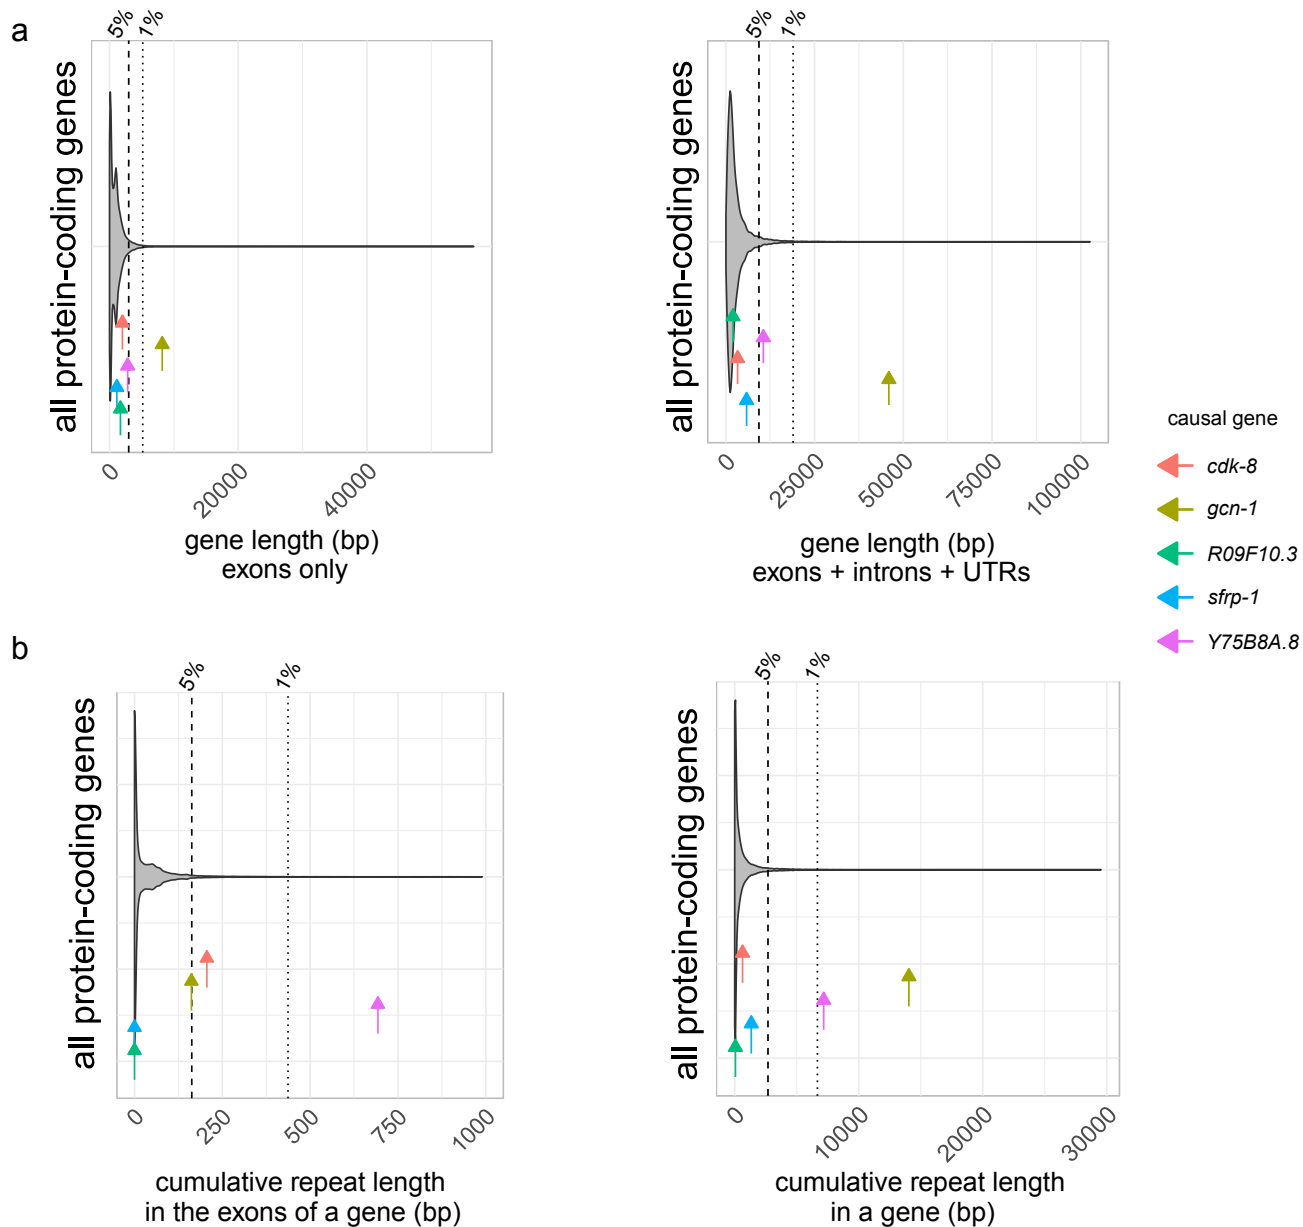

**c data: natural polymorphism (CeNDR)**

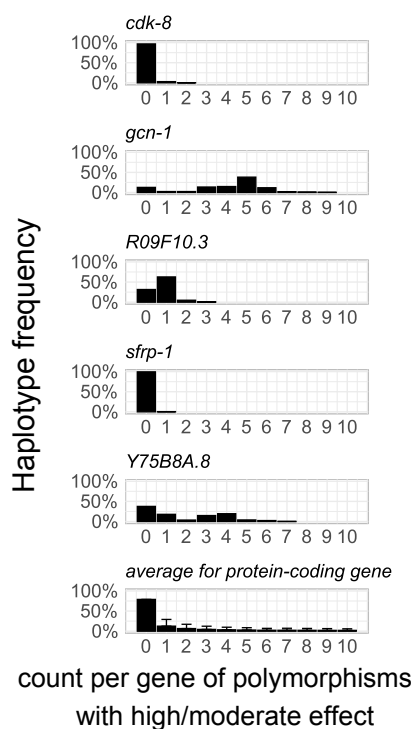

Supplement: supp [file elife_poa_e54928_Figure_6_figure_supplement_1.pdf › elife_poa_e54928_Figure_6_figure_supplement_1.pdf]
